# Supplementary material
Source: PubMed Central journal article supplement (PMC6440870)
Supplement: NIHMS1509874-supplement-1.pdf [file NIHMS1509874-supplement-1.pdf]

**Suppl. Fig. 1.** PDL1 upregulation in OVCA420 cells in response to cisplatin

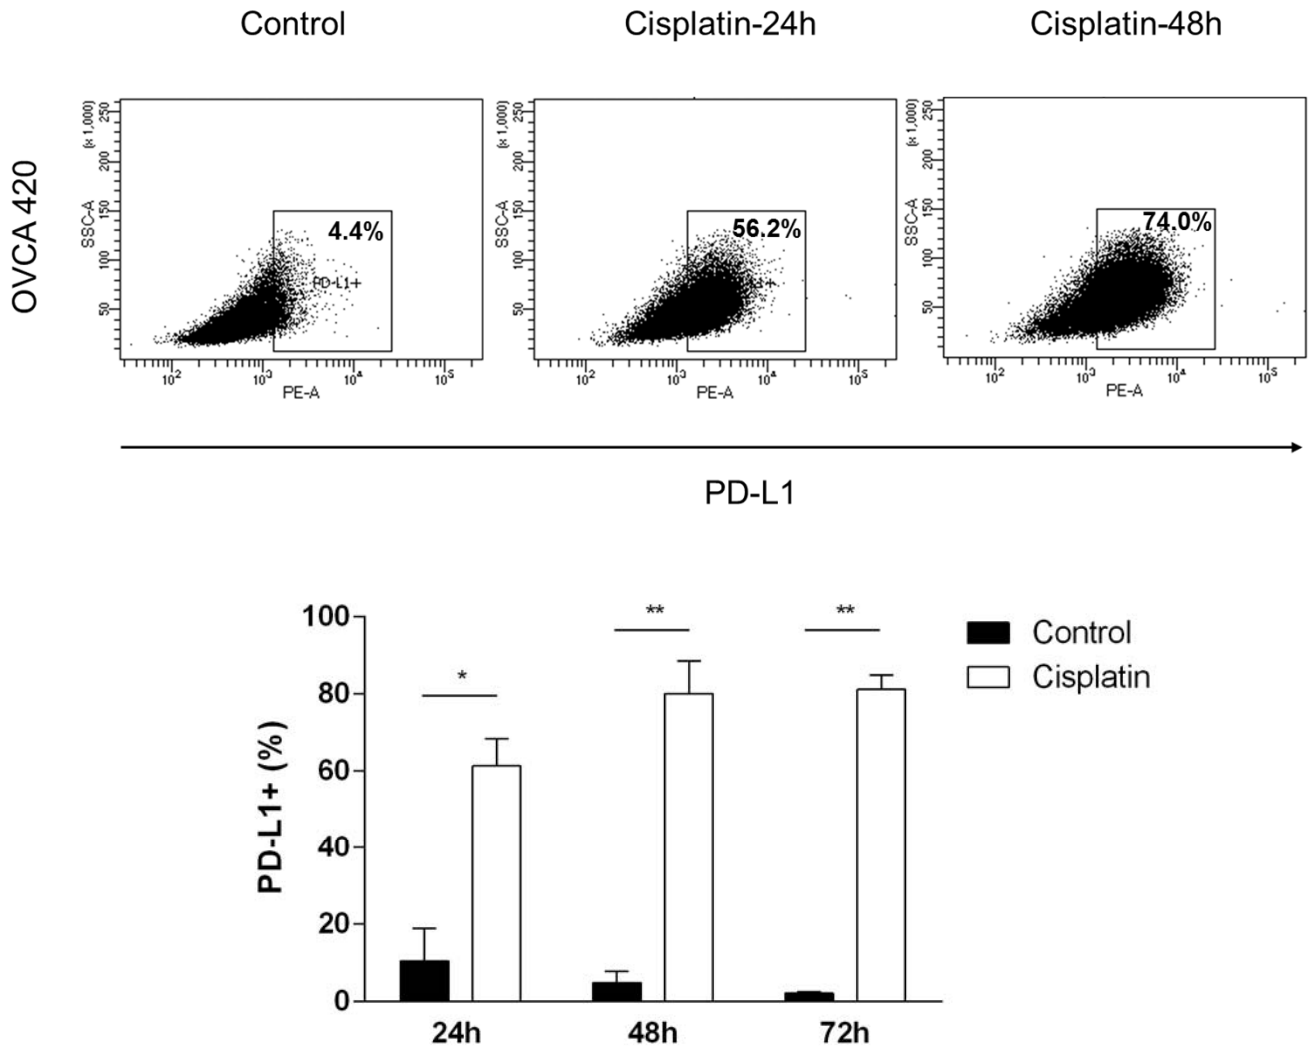

**Supplementary Figure 1.** PD-L1 expression in OVCA420 cells, exposed to cisplatin IC50 for 24, 48 and 72 hours. Untreated cells were used as a control, and isotype control for gating. Average values for the group and SD are shown. \*  $p < 0.05$ , \*\*  $p < 0.01$  Student t test.
