# Supplementary material
Source: PubMed Central journal article supplement (PMC6440870)
Supplement: NIHMS1509874-supplement-3.pdf [file NIHMS1509874-supplement-3.pdf]

**Suppl. Fig. 3.** PD-L1 expression in response to interferons.

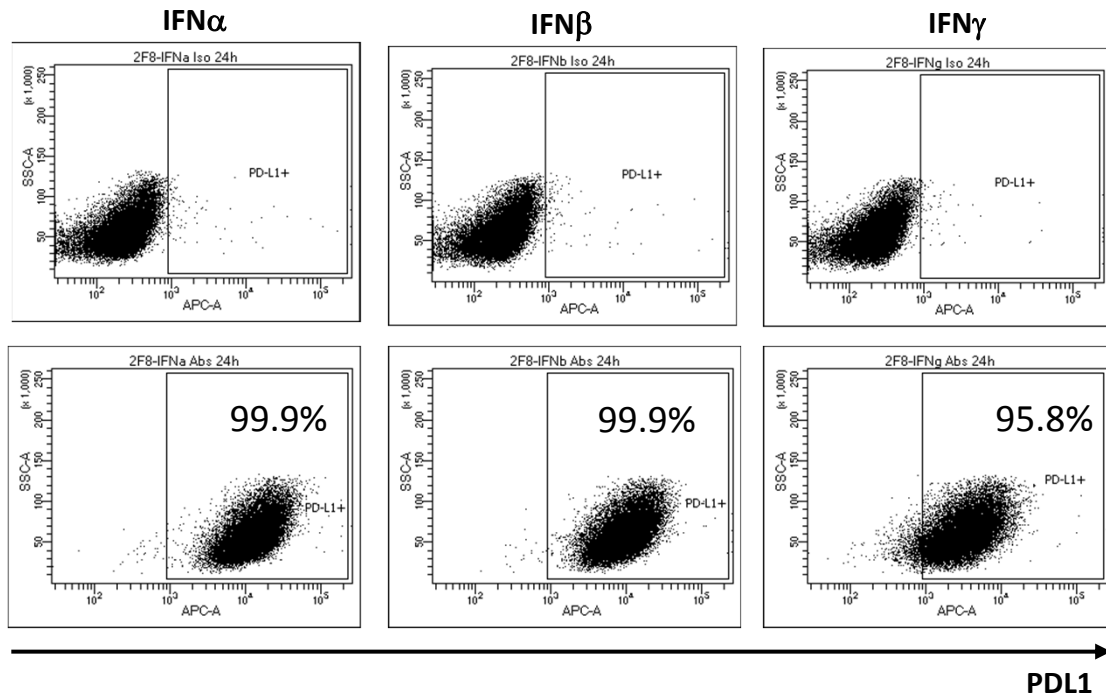

**Supplementary Figure 3.** PD-L1 expression detected by flow cytometry in 2F8 cells treated with IFN $\alpha$  (10,000 IU/ml), IFN $\beta$  (10,000 IU/ml), or IFN $\gamma$  (10 ng/ml) for 24 hours. Percentages represent positive cells. Gates were set up based on staining with isotype control antibody (top panels).
