# Supplementary material
Source: PubMed Central journal article supplement (PMC6440870)
Supplement: NIHMS1509874-supplement-4.pdf [file NIHMS1509874-supplement-4.pdf]

**Suppl. Fig. 4.** STING and cGAS expression in 2F8 and 2F8cis cells treated with IC50 dose of cisplatin

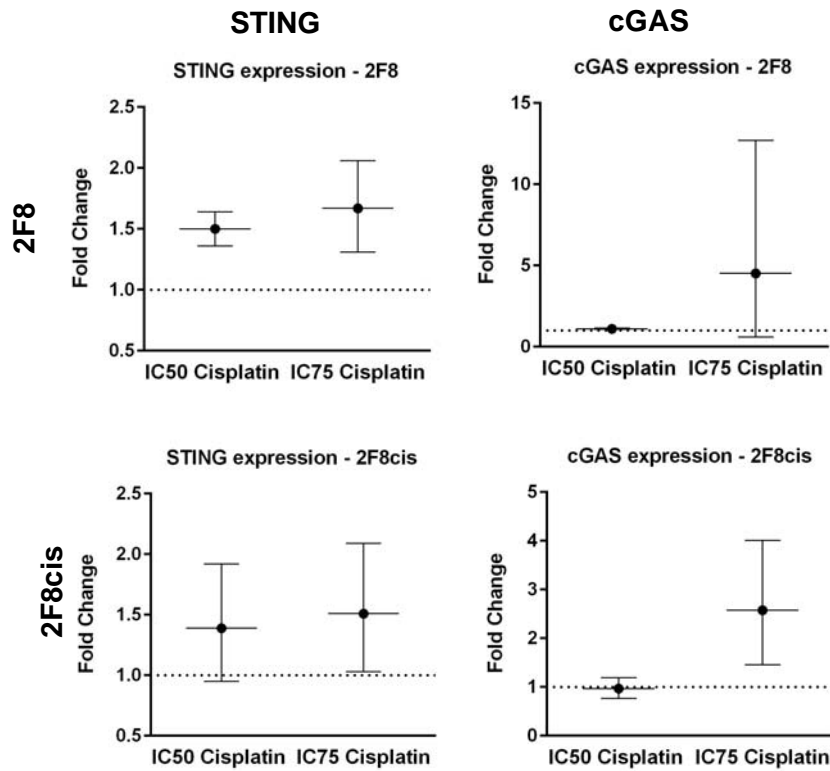

**Supplementary Figure 4.** Densitometry of STING and cGAS expression (by Western blot) in 2F8 and 2F8cis cells treated with IC50 dose of cisplatin. A One-sample t-test on the  $\log_2FC$  was used to compare 2F8/2F8cis baseline with the treatment groups. Confidence intervals were calculated on the log-scale and the limits were then transformed to the scale of the fold-changes (by exponentiating).
