# Supplementary material
Source: PubMed Central journal article supplement (PMC6440870)
Supplement: NIHMS1509874-supplement-5.pdf [file NIHMS1509874-supplement-5.pdf]

**Supplementary Table 1.** 2F8cis cell-specific variants

| Chr | Position               | Ref_allele | Alt_allele |
|-----|------------------------|------------|------------|
| 1   | 1:57393454-57393454    | A          | T          |
| 1   | 1:59852323-59852323    | A          | T          |
| 1   | 1:64566263-64566263    | G          | T          |
| 1   | 1:85085099-85085099    | G          | T          |
| 1   | 1:86529517-86529517    | G          | T          |
| 1   | 1:90802389-90802389    | C          | A          |
| 1   | 1:128349354-128349354  | A          | G          |
| 1   | 1:131929690-131929690  | A          | C          |
| 1   | 1:151715746-151715746  | G          | T          |
| 1   | 1:156007060-156007060  | C          | A          |
| 1   | 1:176774833-176774833  | C          | T          |
| 1   | 1:179681673-179681673  | G          | T          |
| 1   | 1:180904474-180904474  | G          | A          |
| 1   | 1:183316665-183316665  | G          | T          |
| 1   | 1:190800239-190800239  | T          | G          |
| 1   | 1:191311489-191311489  | C          | A          |
| 10  | 10:5086718-5086718     | G          | T          |
| 10  | 10:36993649-36993649   | T          | C          |
| 10  | 10:39532098-39532098   | G          | C          |
| 10  | 10:45092735-45092735   | G          | T          |
| 10  | 10:59166599-59166599   | A          | C          |
| 10  | 10:75927408-75927408   | T          | C          |
| 10  | 10:77096324-77096324   | C          | A          |
| 10  | 10:79548865-79548865   | T          | A          |
| 10  | 10:83316081-83316081   | C          | A          |
| 10  | 10:115401782-115401782 | T          | C          |
| 10  | 10:117820579-117820579 | G          | C          |
| 10  | 10:119211764-119211764 | T          | C          |
| 10  | 10:128365122-128365122 | G          | C          |
| 11  | 11:3969570-3969570     | A          | G          |
| 11  | 11:20709660-20709660   | T          | A          |
| 11  | 11:21148074-21148074   | G          | A          |
| 11  | 11:22956424-22956424   | C          | T          |
| 11  | 11:31081484-31081484   | G          | T          |
| 11  | 11:32250249-32250249   | A          | G          |
| 11  | 11:40736537-40736537   | G          | T          |
| 11  | 11:43421134-43421134   | T          | C          |
| 11  | 11:44548879-44548879   | C          | T          |
| 11  | 11:51825119-51825119   | C          | G          |
| 11  | 11:70652909-70652909   | C          | T          |
| 11  | 11:74900454-74900454   | T          | A          |

|                           |   |   |
|---------------------------|---|---|
| 11 11:75313067-75313067   | G | A |
| 11 11:80389117-80389117   | A | G |
| 11 11:83946218-83946218   | C | A |
| 11 11:83946220-83946220   | A | C |
| 11 11:88073727-88073727   | G | T |
| 11 11:95384992-95384992   | G | A |
| 11 11:97167679-97167679   | C | G |
| 11 11:105131619-105131619 | A | G |
| 11 11:116354443-116354443 | C | T |
| 11 11:119725138-119725138 | A | T |
| 12 12:86883316-86883316   | C | T |
| 12 12:100403448-100403448 | T | C |
| 12 12:110637253-110637253 | C | T |
| 13 13:33039769-33039769   | A | G |
| 13 13:46686901-46686901   | C | A |
| 13 13:58191863-58191863   | C | A |
| 13 13:73801080-73801080   | C | A |
| 13 13:86046632-86046632   | C | G |
| 13 13:96651090-96651090   | G | A |
| 13 13:118387089-118387089 | G | C |
| 14 14:65856472-65856472   | T | C |
| 14 14:120941706-120941706 | G | A |
| 14 14:122020006-122020006 | G | A |
| 14 14:122020007-122020007 | G | T |
| 15 15:38491612-38491612   | T | C |
| 15 15:57963852-57963852   | G | T |
| 15 15:76174636-76174636   | T | G |
| 15 15:76451369-76451369   | T | C |
| 15 15:77783405-77783405   | A | T |
| 15 15:77790743-77790743   | C | A |
| 15 15:81621126-81621126   | G | A |
| 15 15:81627114-81627114   | C | A |
| 15 15:81627115-81627115   | A | T |
| 15 15:102216165-102216165 | C | T |
| 15 15:102298912-102298912 | G | C |
| 15 15:102298913-102298913 | G | A |
| 16 16:10413704-10413704   | C | A |
| 16 16:17641391-17641391   | G | A |
| 16 16:17641392-17641392   | G | C |
| 16 16:18249535-18249535   | G | C |
| 16 16:20657531-20657531   | A | G |
| 16 16:20680757-20680757   | A | T |
| 16 16:21938062-21938062   | C | A |

|                         |   |   |
|-------------------------|---|---|
| 16 16:21938063-21938063 | C | T |
| 16 16:92606056-92606056 | G | T |
| 16 16:96002530-96002530 | A | C |
| 17 17:13810466-13810466 | C | A |
| 17 17:24573514-24573514 | G | T |
| 17 17:35524507-35524507 | G | C |
| 17 17:45674137-45674137 | A | C |
| 17 17:46194214-46194214 | T | G |
| 17 17:46194215-46194215 | C | T |
| 17 17:65833089-65833089 | A | G |
| 17 17:74649731-74649731 | G | T |
| 17 17:74668837-74668837 | A | C |
| 17 17:74668841-74668841 | G | T |
| 18 18:7905461-7905461   | A | G |
| 18 18:10594335-10594335 | A | C |
| 18 18:56432300-56432300 | A | T |
| 19 19:3352588-3352588   | G | T |
| 19 19:4105426-4105426   | G | C |
| 19 19:4105427-4105427   | A | T |
| 19 19:5943570-5943570   | A | C |
| 19 19:6908084-6908084   | A | C |
| 19 19:24100872-24100872 | A | C |
| 19 19:37961083-37961083 | C | A |
| 19 19:40929257-40929257 | G | A |
| 19 19:40952373-40952373 | G | A |
| 19 19:46259201-46259201 | G | T |
| 19 19:46307435-46307435 | G | T |
| 19 19:46307436-46307436 | G | T |
| 19 19:46551672-46551672 | G | A |
| 2 2:6440591-6440591     | G | T |
| 2 2:25206171-25206171   | G | T |
| 2 2:25211191-25211191   | G | A |
| 2 2:25527531-25527531   | T | A |
| 2 2:25938298-25938298   | C | A |
| 2 2:25938299-25938299   | C | A |
| 2 2:30825493-30825493   | A | G |
| 2 2:130422666-130422666 | C | A |
| 2 2:130986783-130986783 | A | G |
| 2 2:140168073-140168073 | C | T |
| 2 2:160720945-160720945 | G | A |
| 2 2:163629188-163629188 | C | A |
| 3 3:5561188-5561188     | C | G |
| 3 3:36088544-36088544   | G | A |

|                         |   |   |
|-------------------------|---|---|
| 3 3:87913119-87913119   | A | T |
| 3 3:89409120-89409120   | C | A |
| 3 3:97741309-97741309   | G | T |
| 3 3:102165455-102165455 | C | A |
| 3 3:104653496-104653496 | G | C |
| 3 3:113629882-113629882 | A | T |
| 3 3:131248453-131248453 | T | G |
| 3 3:132983149-132983149 | T | A |
| 4 4:32801203-32801203   | C | A |
| 4 4:32801206-32801206   | G | T |
| 4 4:66839913-66839913   | A | G |
| 4 4:80953845-80953845   | T | C |
| 4 4:101177738-101177738 | C | T |
| 4 4:115759989-115759989 | A | C |
| 4 4:116692959-116692959 | G | T |
| 4 4:126318031-126318031 | C | A |
| 4 4:147931698-147931698 | C | T |
| 4 4:149644016-149644016 | G | A |
| 5 5:5740540-5740540     | G | T |
| 5 5:35974422-35974422   | G | A |
| 5 5:44473424-44473424   | T | A |
| 5 5:65392377-65392377   | A | T |
| 5 5:72941423-72941423   | T | A |
| 5 5:77407730-77407730   | C | G |
| 5 5:103579740-103579740 | A | C |
| 5 5:125386156-125386156 | C | T |
| 5 5:137501684-137501684 | G | C |
| 5 5:137747516-137747516 | G | T |
| 5 5:143715791-143715791 | A | G |
| 5 5:145096084-145096084 | G | A |
| 6 6:17286929-17286929   | T | G |
| 6 6:33442018-33442018   | A | G |
| 6 6:39359988-39359988   | C | G |
| 6 6:40476489-40476489   | A | T |
| 6 6:71953061-71953061   | G | C |
| 6 6:81962125-81962125   | C | G |
| 6 6:113341917-113341917 | G | T |
| 6 6:113736401-113736401 | T | C |
| 6 6:119937804-119937804 | G | A |
| 6 6:126836248-126836248 | C | A |
| 6 6:138147673-138147673 | A | G |
| 7 7:16564548-16564548   | T | A |
| 7 7:28962140-28962140   | G | C |

|   |                         |   |   |
|---|-------------------------|---|---|
|   | 7 7:34257392-34257392   | C | A |
|   | 7 7:45720437-45720437   | G | A |
|   | 7 7:80393441-80393441   | A | C |
|   | 7 7:97712662-97712662   | G | T |
|   | 7 7:99479968-99479968   | G | T |
|   | 7 7:119785432-119785432 | G | A |
|   | 7 7:132949920-132949920 | G | A |
|   | 7 7:141458741-141458741 | C | A |
|   | 8 8:22535369-22535369   | T | G |
|   | 8 8:39046562-39046562   | G | A |
|   | 8 8:78509611-78509611   | A | T |
|   | 8 8:88317969-88317969   | A | C |
|   | 8 8:94582918-94582918   | C | T |
|   | 8 8:106884768-106884768 | G | A |
|   | 8 8:106885604-106885604 | T | C |
|   | 8 8:119095346-119095346 | G | T |
|   | 8 8:119242247-119242247 | G | A |
|   | 9 9:21795558-21795558   | T | A |
|   | 9 9:21795559-21795559   | C | T |
|   | 9 9:44715375-44715375   | A | C |
|   | 9 9:49061147-49061147   | G | A |
|   | 9 9:53460909-53460909   | C | A |
|   | 9 9:53460910-53460910   | T | A |
|   | 9 9:66542535-66542535   | T | C |
|   | 9 9:80143694-80143694   | G | T |
|   | 9 9:90205171-90205171   | C | G |
|   | 9 9:100834528-100834528 | C | A |
|   | 9 9:108480439-108480439 | A | T |
|   | 9 9:110173957-110173957 | G | A |
|   | 9 9:120131419-120131419 | A | G |
| X | X:94209619-94209619     | C | A |
| X | X:160123845-160123845   | T | A |

| <b>Consequence</b> | <b>MGI gene symbol</b> | <b>Uniprot ID</b> | <b>Amino_acids</b> |
|--------------------|------------------------|-------------------|--------------------|
| missense_variant   | Tyw5                   | A2RSX7            | L/I                |
| missense_variant   | Bmpr2                  | O35607            | E/D                |
| missense_variant   | Creb1                  | Q01147            | S/I                |
| missense_variant   | A530032D15Rik          | E9Q422            | Q/K                |
| missense_variant   | Ptma                   | P26350            | G/V                |
| missense_variant   | Col6a3                 | J3QQ16            | A/S                |
| missense_variant   | Mcm6                   | P97311            | F/S                |
| missense_variant   | Nucks1                 | Q80XU3            | K/Q                |
| missense_variant   | Fam129a                | Q3UW53            | E/D                |
| missense_variant   | Tor1aip1               | Q921T2            | K/N                |
| missense_variant   | Cep170                 | H7BX26            | E/K                |
| missense_variant   | Sccpdh                 | Q8R127            | G/V                |
| missense_variant   | Pycr2                  | Q922Q4            | G/D                |
| synonymous_variant | Aida                   | Q8C4Q6            | G                  |
| missense_variant   | Rps6kc1                | E9QMX4            | K/T                |
| missense_variant   | Nenf                   | Q9CQ45            | G/V                |
| missense_variant   | Syne1                  | -                 | P/T                |
| synonymous_variant | Hdac2                  | -                 | F                  |
| synonymous_variant | Fyn                    | P39688            | A                  |
| missense_variant   | Prep                   | Q9QUR6            | A/S                |
| synonymous_variant | Sept10                 | -                 | V                  |
| missense_variant   | Mmp11                  | Q02853            | T/A                |
| synonymous_variant | Col18a1                | P39061            | G                  |
| missense_variant   | Mier2                  | Q3U3N0            | E/D                |
| missense_variant   | Slc41a2                | Q8BYR8            | A/S                |
| missense_variant   | Zfc3h1                 | B2RT41            | Y/H                |
| missense_variant   | Rap1b                  | Q99JI6            | D/E                |
| missense_variant   | Cand1                  | Q6ZQ38            | D/G                |
| missense_variant   | Coq10a                 | E9Q3H6            | S/R                |
| missense_variant   | Pes1                   | Q9EQ61            | K/R                |
| missense_variant   | Aftph                  | Q80WT5            | K/M                |
| missense_variant   | Peli1                  | Q8C669            | A/T                |
| missense_variant   | Commd1                 | Q8K4M5            | G/E                |
| missense_variant   | Asb3                   | Q9WV72            | G/V                |
| synonymous_variant | Nprl3                  | Q8VIJ8            | C                  |
| missense_variant   | Nudcd2                 | Q9CQ48            | D/Y                |
| missense_variant   | Pttg1                  | Q9CQJ7            | K/E                |
| synonymous_variant | Rnf145                 | Q5SWK7            | T                  |
| missense_variant   | Jade2                  | Q6ZQF7            | A/P                |
| missense_variant   | Pfn1                   | P62962            | G/D                |
| missense_variant   | Tsr1                   | Q5SWD9            | N/K                |

|                    |           |        |     |
|--------------------|-----------|--------|-----|
| missense_variant   | Rpa1      | Q5SWN2 | P/L |
| synonymous_variant | Zfp207    | Q9JMD0 | P   |
| synonymous_variant | Ddx52     | Q8K301 | L   |
| missense_variant   | Ddx52     | Q8K301 | Q/P |
| missense_variant   | Vezf1     | Q5SXC4 | S/I |
| missense_variant   | Slc35b1   | E0CZ89 | D/N |
| missense_variant   | Kpnb1     | P70168 | V/L |
| missense_variant   | Mettl2    | Q8BMK1 | I/V |
| synonymous_variant | Rnf157    | A2AAN9 | R   |
| synonymous_variant | Rptor     | A2ACM0 | T   |
| synonymous_variant | Irf2bpl   | Q8K3X4 | Q   |
| missense_variant   | Ttc7b     | E9Q6P5 | D/G |
| missense_variant   | Dync1h1   | Q9JHU4 | P/S |
| missense_variant   | Serpinb9b | Q9DAV6 | I/V |
| missense_variant   | Nup153    | E9Q3G8 | G/V |
| missense_variant   | Ubqln1    | Q8R317 | A/S |
| missense_variant   | Slc12a7   | Q9WVL3 | A/D |
| missense_variant   | Cox7c     | P17665 | R/P |
| synonymous_variant | Hmgcr     | Q01237 | G   |
| missense_variant   | Mrps30    | Q9D0G0 | A/G |
| missense_variant   | Ccdc25    | Q78PG9 | L/P |
| synonymous_variant | Ipo5      | Q8BKC5 | K   |
| synonymous_variant | Ubac2     | Q8R1K1 | R   |
| missense_variant   | Ubac2     | Q8R1K1 | A/S |
| missense_variant   | Azin1     | O35484 | S/G |
| missense_variant   | Tbc1d31   | Q6NXY1 | A/S |
| synonymous_variant | Plec      | Q9QXS1 | A   |
| missense_variant   | Mroh1     | E0CZ22 | L/P |
| synonymous_variant | Myh9      | Q8VDD5 | S   |
| missense_variant   | Myh9      | Q8VDD5 | A/S |
| missense_variant   | Ep300     | B2RWS6 | R/Q |
| synonymous_variant | Ep300     | B2RWS6 | S   |
| missense_variant   | Ep300     | B2RWS6 | S/C |
| missense_variant   | Itgb7     | P26011 | D/N |
| missense_variant   | Espl1     | P60330 | Q/H |
| missense_variant   | Espl1     | P60330 | A/T |
| missense_variant   | Nubp1     | Q9R060 | A/E |
| synonymous_variant | Smpd4     | Q6ZPR5 | Q   |
| missense_variant   | Smpd4     | Q6ZPR5 | A/P |
| missense_variant   | Trmt2a    | Q3UYU2 | S/T |
| missense_variant   | Psmd2     | Q8VDM4 | E/G |
| missense_variant   | Eif4g1    | Q6NZJ6 | N/Y |
| missense_variant   | Tmem41a   | Q9D8U2 | W/C |

|                    |         |        |     |
|--------------------|---------|--------|-----|
| stop_gained        | Tmem41a | Q9D8U2 | W/* |
| missense_variant   | Runx1   | Q3UM65 | R/S |
| missense_variant   | Brwd1   | Q921C3 | L/V |
| missense_variant   | Afdn    | Q9QZQ1 | T/N |
| missense_variant   | Pkd1    | O08852 | A/S |
| missense_variant   | Cchcr1  | Q8K2I2 | G/A |
| missense_variant   | Tmem63b | Q3TWI9 | F/V |
| missense_variant   | Polh    | Q9JJN0 | T/P |
| synonymous_variant | Polh    | Q9JJN0 | E   |
| missense_variant   | Ppp4r1  | E9QPR5 | N/D |
| missense_variant   | Birc6   | O88738 | L/F |
| missense_variant   | Birc6   | O88738 | T/P |
| missense_variant   | Birc6   | O88738 | G/V |
| missense_variant   | Wac     | Q924H7 | Y/C |
| missense_variant   | Esco1   | Q69Z69 | I/S |
| missense_variant   | Gramd3  | Q9D2W5 | E/V |
| missense_variant   | Cpt1a   | P97742 | G/V |
| missense_variant   | Pitpnm1 | O35954 | D/H |
| missense_variant   | Pitpnm1 | O35954 | D/V |
| synonymous_variant | Pola2   | P33611 | S   |
| missense_variant   | Prdx5   | P99029 | F/L |
| missense_variant   | Tjp2    | Q9Z0U1 | L/V |
| missense_variant   | Myof    | Q69ZN7 | R/S |
| synonymous_variant | Blnk    | Q9QUN3 | H   |
| synonymous_variant | Blnk    | Q9QUN3 | S   |
| missense_variant   | Gbf1    | Q6DFZ1 | G/V |
| missense_variant   | Nfkb2   | Q9WTK5 | R/M |
| missense_variant   | Nfkb2   | Q9WTK5 | R/S |
| synonymous_variant | Arl3    | Q9WUL7 | S   |
| missense_variant   | Usp6nl  | Q80XC3 | G/W |
| missense_variant   | Nelfb   | -      | P/T |
| missense_variant   | Nelfb   | -      | L/F |
| missense_variant   | Traf2   | P39429 | R/S |
| missense_variant   | Camsap1 | -      | G/V |
| missense_variant   | Camsap1 | -      | G/C |
| missense_variant   | Asb6    | Q91ZU1 | L/P |
| synonymous_variant | Pced1a  | Q6P1Z5 | G   |
| missense_variant   | Atrn    | Q9WU60 | T/A |
| synonymous_variant | Esf1    | Q3V1V3 | E   |
| synonymous_variant | Top1    | Q04750 | K   |
| missense_variant   | Serinc3 | Q9QZI9 | Q/H |
| missense_variant   | Pex2    | Q91YZ5 | G/A |
| missense_variant   | Acad9   | Q8JZN5 | R/Q |



|                    |          |        |     |
|--------------------|----------|--------|-----|
| missense_variant   | Hdgf     | P51859 | K/M |
| missense_variant   | Flad1    | Q8R123 | R/L |
| missense_variant   | Pde4dip  | Q80YT7 | L/M |
| missense_variant   | Vangl1   | Q80Z96 | A/S |
| missense_variant   | Slc16a1  | P53986 | M/I |
| missense_variant   | Rnpc3    | Q3UZ01 | L/Q |
| missense_variant   | Hadh     | Q61425 | N/H |
| missense_variant   | Gstcd    | Q5RL51 | Q/H |
| missense_variant   | Lym2     | Q8R033 | L/I |
| missense_variant   | Lym2     | Q8R033 | A/S |
| synonymous_variant | Tlr4     | Q9QUK6 | A   |
| synonymous_variant | Lurap1l  | Q8K2P1 | L   |
| missense_variant   | Jak1     | B1ASP2 | E/K |
| missense_variant   | Efcab14  | Q6PCQ6 | R/S |
| missense_variant   | Prdx1    | P35700 | A/S |
| missense_variant   | Adprhl2  | Q8CG72 | V/L |
| synonymous_variant | Plod1    | Q9R0E2 | K   |
| missense_variant   | Clstn1   | Q9EPL2 | G/D |
| missense_variant   | Steap1   | Q9CWR7 | A/E |
| synonymous_variant | Afap1    | Q80YS6 | R   |
| missense_variant   | Ldb2     | O55203 | Q/L |
| missense_variant   | Lias     | Q99M04 | Q/L |
| missense_variant   | Slain2   | Q8CI08 | L/H |
| missense_variant   | Igfbp7   | E9Q5D9 | K/N |
| missense_variant   | Ptpn13   | G5E8B1 | E/A |
| synonymous_variant | Ubc      | P0CG50 | E   |
| missense_variant   | Pop7     | Q9DCH2 | A/G |
| missense_variant   | Tsc22d4  | Q3U1U6 | G/V |
| synonymous_variant | Usp42    | B2RQC2 | L   |
| missense_variant   | Arpc1a   | Q9R0Q6 | V/I |
| missense_variant   | Cav2     | Q9WVC3 | M/R |
| missense_variant   | Exoc4    | O35382 | S/G |
| missense_variant   | Slc37a3  | -      | G/R |
| missense_variant   | Ssbp1    | Q9CYR0 | S/C |
| missense_variant   | Polr1a   | O35134 | G/R |
| missense_variant   | Mrpl19   | Q9D338 | R/P |
| missense_variant   | Camk1    | Q91YS8 | Q/K |
| synonymous_variant | Sec13    | Q9D1M0 | G   |
| missense_variant   | Wnk1     | P83741 | A/V |
| missense_variant   | Ndufa9   | Q9DC69 | R/M |
| missense_variant   | Mgst1    | E9QJW0 | E/G |
| synonymous_variant | Arhgap35 | Q91YM2 | V   |
| missense_variant   | Actn4    | P57780 | P/R |

|                    |               |        |     |
|--------------------|---------------|--------|-----|
| synonymous_variant | 4931406P16Rik | Q8C5X1 | G   |
| synonymous_variant | Rpl18         | P35980 | E   |
| missense_variant   | Furin         | P23188 | Y/D |
| missense_variant   | Clns1a        | Q923F1 | A/S |
| missense_variant   | Rps3          | P62908 | S/Y |
| synonymous_variant | Eri2          | Q5BKS4 | A   |
| missense_variant   | Zranb1        | Q7M760 | R/K |
| missense_variant   | Pnpla2        | Q8BJ56 | P/T |
| missense_variant   | Slc20a2       | Q80UP8 | V/G |
| synonymous_variant | Tusc3         | Q8BTV1 | R   |
| missense_variant   | Slc10a7       | Q5PT53 | M/L |
| synonymous_variant | Adcy7         | P51829 | R   |
| missense_variant   | Fam192a       | Q91WE2 | A/T |
| missense_variant   | Chtf8         | P0CG14 | A/V |
| synonymous_variant | Chtf8         | P0CG14 | L   |
| missense_variant   | Cdh13         | Q9WTR5 | A/S |
| missense_variant   | Cdh13         | Q9WTR5 | D/N |
| stop_gained        | Kank2         | Q8BX02 | K/* |
| synonymous_variant | Kank2         | Q8BX02 | E   |
| missense_variant   | Phldb1        | Q6PDH0 | L/R |
| synonymous_variant | Zw10          | O54692 | Q   |
| missense_variant   | Atm           | Q62388 | S/I |
| missense_variant   | Atm           | Q62388 | S/C |
| missense_variant   | Usp3          | Q91W36 | R/G |
| missense_variant   | Senp6         | F6Z9A1 | W/C |
| missense_variant   | Tbc1d2b       | Q3U0J8 | Q/H |
| missense_variant   | Stag1         | Q9D3E6 | T/N |
| missense_variant   | Lamb2         | Q61292 | S/C |
| missense_variant   | Smarcc1       | P97496 | D/N |
| synonymous_variant | Rpsa          | P14206 | P   |
| missense_variant   | Eif2s3x       | Q9Z0N1 | A/S |
| missense_variant   | Pdha1         | P35486 | S/C |

## Codons

Tta/Ata  
gaA/gaT  
aGt/aTt  
Caa/Aaa  
gGt/gTt  
Gct/Tct  
tTc/tCc  
Aaa/Caa  
gaG/gaT  
aaG/aaT  
Gag/Aag  
gGc/gTc  
gGt/gAt  
ggG/ggT  
aAg/aCg  
gGa/gTa  
Cct/Act  
ttT/ttC  
gcG/gcC  
Gcc/Tcc  
gtT/gtG  
Acc/Gcc  
ggG/ggT  
gaA/gaT  
Gct/Tct  
Tac/Cac  
gaC/gaG  
gAt/gGt  
agC/agG  
aAg/aGg  
aAg/aTg  
Gct/Act  
gGa/gAa  
gGt/gTt  
tgT/tgC  
Gat/Tat  
Aag/Gag  
acC/acT  
Gct/Cct  
gGc/gAc  
aaT/aaA

cCc/cTc  
ccA/ccG  
ctC/ctA  
cAg/cCg  
aGt/aTt  
Gac/Aac  
Gtg/Ctg  
Att/Gtt  
agG/agA  
acA/acT  
caG/caA  
gAc/gGc  
Ccc/Tcc  
Att/Gtt  
gGc/gTc  
Gct/Tct  
gCc/gAc  
cGt/cCt  
ggC/ggT  
gCt/gGt  
cTg/cCg  
aaG/aaA  
agG/agA  
Gcc/Tcc  
Agc/Ggc  
Gcc/Tcc  
gcA/gcC  
cTc/cCc  
tcT/tcA  
Gcc/Tcc  
cGa/cAa  
tcC/tcA  
Agt/Tgt  
Gac/Aac  
caG/caC  
Gct/Act  
gCa/gAa  
caG/caA  
Gcc/Ccc  
aGc/aCc  
gAg/gGg  
Aat/Tat  
tgG/tgT

tGg/tAg  
Cgc/Agc  
Ttg/Gtg  
aCt/aAt  
Gcc/Tcc  
gGc/gCc  
Ttc/Gtc  
Act/Cct  
gaG/gaA  
Aac/Gac  
ttG/ttT  
Aca/Cca  
gGt/gTt  
tAc/tGc  
aTt/aGt  
gAg/gTg  
gGc/gTc  
Gac/Cac  
gAc/gTc  
tcT/tcG  
ttT/ttG  
Tta/Gta  
agG/agT  
caC/caT  
agC/agT  
gGt/gTt  
aGg/aTg  
agG/agT  
agC/agT  
Ggg/Tgg  
Ccc/Acc  
Ctc/Ttc  
agA/agT  
gGc/gTc  
Ggc/Tgc  
cTc/cCc  
ggG/ggT  
Acc/Gcc  
gaG/gaA  
aaG/aaA  
caG/caT  
gGc/gCc  
cGg/cAg

aAg/aTg  
cGc/cTc  
Ctg/Atg  
Gcc/Tcc  
atG/atC  
cTg/cAg  
Aac/Cac  
caA/caT  
Ctt/Att  
Gcc/Tcc  
gcA/gcG  
Ttg/Ctg  
Gaa/Aaa  
agA/agC  
Gct/Tct  
Gta/Tta  
aaG/aaA  
gGc/gAc  
gCg/gAg  
cgG/cgA  
cAg/cTg  
cAg/cTg  
cTt/cAt  
aaG/aaC  
gAa/gCa  
gaG/gaA  
gCc/gGc  
gGc/gTc  
Ttg/Ctg  
Gtc/Atc  
aTg/aGg  
Agt/Ggt  
Gga/Cga  
Agt/Tgt  
Ggg/Cgg  
cGc/cCc  
Cag/Aag  
ggA/ggG  
gCa/gTa  
aGg/aTg  
gAg/gGg  
gtA/gtT  
cCg/cGg

ggG/ggT  
gaG/gaA  
Tac/Gac  
Gcc/Tcc  
tCc/tAc  
gcC/gcT  
aGa/aAa  
Cct/Act  
gTt/gGt  
agG/agA  
Atg/Ttg  
Agg/Cgg  
Gca/Aca  
gCt/gTt  
ttA/ttG  
Gcg/Tcg  
Gac/Aac  
Aag/Tag  
gaG/gaA  
cTt/cGt  
caG/caA  
aGt/aTt  
Agt/Tgt  
Agg/Ggg  
tgG/tgT  
caG/caC  
aCt/aAt  
Agt/Tgt  
Gac/Aac  
ccA/ccG  
Gct/Tct  
Agt/Tgt
