# Supplementary material
Source: PubMed Central journal article supplement (PMC6440870)
Supplement: NIHMS1509874-supplement-6.pdf [file NIHMS1509874-supplement-6.pdf]

2B. Differentially expressed genes following IFN alpha treatment of 2F8 cells. Positive effect size means up

| Gene symbol          | mean_intensity | mean_counts | total_counts | effect_size | tagwise_dispersion |
|----------------------|----------------|-------------|--------------|-------------|--------------------|
| <i>Oas1g</i>         | -13.39490502   | 4186        | 16742        | 8.902773044 | 0.043084316        |
| <i>Tgtp2</i>         | -11.5575389    | 23703       | 94813        | 8.685684979 | 0.047192593        |
| <i>Tgtp1</i>         | -11.51842336   | 23984       | 95937        | 8.630384667 | 0.047423905        |
| <i>Oas1a</i>         | -12.78360245   | 5805        | 23219        | 8.333618702 | 0.043353433        |
| <i>Ifi44</i>         | -11.36892598   | 23503       | 94012        | 8.300770766 | 0.152274267        |
| <i>Oas2</i>          | -12.62423366   | 5644        | 22577        | 7.959209111 | 0.042285857        |
| <i>ligp1</i>         | -10.73538387   | 31757       | 127028       | 7.630141599 | 0.041193732        |
| <i>Oas3</i>          | -12.8035002    | 3654        | 14617        | 7.446525339 | 0.047822074        |
| <i>Ifi44l</i>        | -14.14129032   | 944         | 3777         | 7.410002438 | 0.055666131        |
| <i>Zbp1</i>          | -11.85567767   | 7600        | 30400        | 7.011414446 | 0.056157114        |
| <i>Oasl2</i>         | -11.39958507   | 11653       | 46612        | 6.958518749 | 0.039720921        |
| <i>Rsad2</i>         | -12.61546959   | 3340        | 13358        | 6.878124956 | 0.054953087        |
| <i>Usp18</i>         | -11.07813988   | 15443       | 61773        | 6.877009391 | 0.040119748        |
| <i>Gbp3</i>          | -9.898880737   | 40780       | 163119       | 6.460058498 | 0.060262005        |
| <i>Gbp7</i>          | -11.89482177   | 5365        | 21460        | 6.393551202 | 0.043089831        |
| <i>Ddx60</i>         | -13.06262924   | 1664        | 6657         | 6.389270775 | 0.043919738        |
| <i>Oasl1</i>         | -12.74403865   | 2224        | 8896         | 6.333304767 | 0.040773336        |
| <i>Slfn2</i>         | -13.45655828   | 1070        | 4281         | 6.294559876 | 0.048887075        |
| <i>Ifit3</i>         | -9.082977582   | 84822       | 339287       | 6.291354983 | 0.056450545        |
| <i>Ifit3b</i>        | -9.456465359   | 57679       | 230717       | 6.266834112 | 0.052444032        |
| <i>Gm4951</i>        | -12.54020369   | 2599        | 10397        | 6.230149059 | 0.044320314        |
| <i>Ccrl2</i>         | -14.04252555   | 579         | 2317         | 6.221237605 | 0.073793182        |
| <i>Ifit1</i>         | -9.69577524    | 44151       | 176605       | 6.210235946 | 0.047403738        |
| <i>Rtp4</i>          | -12.30890622   | 3230        | 12919        | 6.20723619  | 0.040511569        |
| <i>Pydc4</i>         | -14.19940806   | 487         | 1948         | 6.195154671 | 0.069350807        |
| <i>Irf7</i>          | -9.280318608   | 63901       | 255603       | 6.117653977 | 0.044297574        |
| <i>Mx2</i>           | -12.63262862   | 2181        | 8724         | 6.070617004 | 0.045848363        |
| <i>Olfr56</i>        | -10.01683024   | 28872       | 115488       | 5.995089141 | 0.087703386        |
| <i>Oas1c</i>         | -14.50774535   | 321         | 1283         | 5.983945199 | 0.070925799        |
| <i>Tap1</i>          | -12.70283308   | 1864        | 7456         | 5.892467765 | 0.042404575        |
| <i>Mpeg1</i>         | -12.7189357    | 1814        | 7254         | 5.872685051 | 0.041586586        |
| <i>Phf11b</i>        | -11.65319546   | 4942        | 19768        | 5.742402416 | 0.117630987        |
| <i>Igtp</i>          | -10.84080666   | 11110       | 44442        | 5.737122814 | 0.100289769        |
| <i>Batf2</i>         | -15.04244406   | 156         | 622          | 5.607694963 | 0.083288111        |
| <i>Phf11d</i>        | -10.96889688   | 8973        | 35891        | 5.563326269 | 0.103952596        |
| <i>Cxcl10</i>        | -12.63988167   | 1624        | 6494         | 5.471177311 | 0.239791662        |
| <i>Slfn8</i>         | -11.09781698   | 7495        | 29979        | 5.461994097 | 0.357138925        |
| <i>Psmb8</i>         | -15.11545521   | 134         | 536          | 5.461672666 | 0.081820316        |
| <i>Oas1b</i>         | -12.74298298   | 1418        | 5674         | 5.427493623 | 0.056550486        |
| <i>Ms4a4d</i>        | -14.44201368   | 258         | 1033         | 5.422261357 | 0.068812882        |
| <i>Phf11a</i>        | -12.13964073   | 2418        | 9673         | 5.277736715 | 0.073716084        |
| <i>2010002M12Rik</i> | -11.99630509   | 2783        | 11133        | 5.276725936 | 0.040269546        |
| <i>Gbp10</i>         | -11.31316925   | 5189        | 20756        | 5.1519923   | 0.077162959        |
| <i>Gbp2</i>          | -10.91887516   | 7633        | 30533        | 5.130950653 | 0.088925537        |

|                      |              |        |        |             |             |
|----------------------|--------------|--------|--------|-------------|-------------|
| <b>Bst2</b>          | -10.36111643 | 12948  | 51794  | 5.082788805 | 0.035329701 |
| <b>Ifih1</b>         | -13.02804398 | 882    | 3530   | 5.041375265 | 0.049310793 |
| <b>Irgm2</b>         | -10.47529192 | 11319  | 45277  | 5.03598749  | 0.045279213 |
| <b>Pydc3</b>         | -13.39505037 | 601    | 2405   | 5.010662039 | 0.0525701   |
| <b>Isg15</b>         | -9.944146532 | 18391  | 73563  | 4.948179798 | 0.076597236 |
| <b>Psemb9</b>        | -15.39098631 | 78     | 314    | 4.910610446 | 0.117232599 |
| <b>Gm6904</b>        | -12.87844945 | 960    | 3838   | 4.905246251 | 0.057570666 |
| <b>Ifi47</b>         | -10.30510425 | 11937  | 47747  | 4.794373199 | 0.292319097 |
| <b>Gm14446</b>       | -11.63419598 | 3358   | 13432  | 4.756097398 | 0.165600978 |
| <b>Trim34b</b>       | -13.8210433  | 346    | 1384   | 4.754659619 | 0.076990982 |
| <b>Hsh2d</b>         | -15.48637234 | 64     | 255    | 4.719838403 | 0.095607928 |
| <b>Gbp5</b>          | -13.48944905 | 468    | 1870   | 4.68833329  | 0.058473957 |
| <b>Trim34a</b>       | -12.60984219 | 1108   | 4433   | 4.655787538 | 0.071888098 |
| <b>Uba7</b>          | -11.71810071 | 2696   | 10784  | 4.650491647 | 0.078025649 |
| <b>Apol10b</b>       | -13.51902208 | 403    | 1613   | 4.420432403 | 0.344233874 |
| <b>Phf11c</b>        | -12.02049177 | 1736   | 6945   | 4.368151314 | 0.073264343 |
| <b>Slfn1</b>         | -15.73426238 | 39     | 157    | 4.224058323 | 0.121465904 |
| <b>Trim12a</b>       | -11.98332557 | 1648   | 6594   | 4.18424883  | 0.081558523 |
| <b>C4b</b>           | -13.83478441 | 254    | 1016   | 4.131193965 | 0.077787553 |
| <b>Gm4841</b>        | -11.93478715 | 1662   | 6650   | 4.096355109 | 0.047965333 |
| <b>Dhx58</b>         | -11.63759562 | 2219   | 8877   | 4.081001352 | 0.120841535 |
| <b>F830016B08Rik</b> | -13.72192325 | 276    | 1104   | 4.074349315 | 0.096436614 |
| <b>Parp14</b>        | -10.67653253 | 5749   | 22995  | 4.069167584 | 0.035585689 |
| <b>Meiob</b>         | -15.4941918  | 44     | 178    | 4.011052293 | 0.095974035 |
| <b>Abi3bp</b>        | -12.34386292 | 1045   | 4180   | 3.987351094 | 0.045549789 |
| <b>Lgals3bp</b>      | -9.63493463  | 15600  | 62400  | 3.980652473 | 0.055700201 |
| <b>Misp</b>          | -14.28259122 | 145    | 579    | 3.908524805 | 0.082534524 |
| <b>Trim21</b>        | -10.84993444 | 4386   | 17544  | 3.867163679 | 0.072576285 |
| <b>Trim12c</b>       | -10.67753124 | 5205   | 20819  | 3.858318968 | 0.120806461 |
| <b>Ube2l6</b>        | -10.46426796 | 6383   | 25531  | 3.842651353 | 0.144135495 |
| <b>Ly6e</b>          | -7.566849468 | 114615 | 458459 | 3.818844495 | 0.201357364 |
| <b>Tap2</b>          | -13.06565555 | 466    | 1863   | 3.808699341 | 0.058951317 |
| <b>Gbp2b</b>         | -14.59186249 | 101    | 404    | 3.800807896 | 0.0971911   |
| <b>Herc6</b>         | -10.10209416 | 8978   | 35911  | 3.799719272 | 0.10827779  |
| <b>Irgm1</b>         | -9.669193414 | 13723  | 54892  | 3.784703458 | 0.063155673 |
| <b>Stat1</b>         | -7.899422979 | 79194  | 316775 | 3.74484867  | 0.073238176 |
| <b>Parp9</b>         | -10.85525495 | 4110   | 16438  | 3.740329269 | 0.124403186 |
| <b>Gbp4</b>          | -10.6684955  | 4859   | 19437  | 3.67717001  | 0.339420201 |
| <b>Nlrc5</b>         | -12.42344325 | 830    | 3320   | 3.677116678 | 0.130754541 |
| <b>Apod</b>          | -9.431390987 | 16154  | 64617  | 3.627003094 | 0.058132068 |
| <b>Hap1</b>          | -13.15134122 | 387    | 1548   | 3.606075456 | 0.079265549 |
| <b>Stat2</b>         | -9.541313173 | 14041  | 56163  | 3.564405285 | 0.05635428  |
| <b>Sp100</b>         | -10.15613815 | 7544   | 30178  | 3.551782554 | 0.047948299 |
| <b>Trim30a</b>       | -9.707563504 | 11770  | 47081  | 3.542020678 | 0.053845528 |
| <b>Dtx3l</b>         | -10.56626392 | 4810   | 19240  | 3.465710516 | 0.058539017 |
| <b>Ifit2</b>         | -8.653085375 | 32877  | 131509 | 3.458984057 | 0.0823714   |
| <b>Apol9a</b>        | -8.958069512 | 22838  | 91351  | 3.354172977 | 0.08361389  |

|                 |              |        |        |             |             |
|-----------------|--------------|--------|--------|-------------|-------------|
| <b>Gm4070</b>   | -7.070918798 | 150884 | 603538 | 3.348941242 | 0.201577364 |
| <b>Gvin1</b>    | -7.070918798 | 150884 | 603538 | 3.348941242 | 0.201577364 |
| <b>Tuba8</b>    | -15.6644902  | 26     | 106    | 3.264990388 | 0.139600178 |
| <b>Gbp9</b>     | -10.07227569 | 7168   | 28670  | 3.252493179 | 0.165465832 |
| <b>Sp110</b>    | -10.64973441 | 3995   | 15981  | 3.249326793 | 0.036334227 |
| <b>Il18bp</b>   | -13.30587544 | 280    | 1118   | 3.246021468 | 0.060191924 |
| <b>Samd9l</b>   | -8.945983624 | 21680  | 86718  | 3.221901384 | 0.051489895 |
| <b>Apol9b</b>   | -8.945830094 | 21606  | 86423  | 3.208396999 | 0.074858337 |
| <b>Trim30d</b>  | -9.826825416 | 8767   | 35068  | 3.16810932  | 0.064365864 |
| <b>Tmem229b</b> | -13.30605769 | 266    | 1065   | 3.122043007 | 0.245140386 |
| <b>Cyp26a1</b>  | -15.14761821 | 40     | 162    | 3.094761561 | 0.089245141 |
| <b>Tlr3</b>     | -10.55471308 | 4077   | 16307  | 3.087937277 | 0.054573557 |
| <b>Gbp11</b>    | -11.95572331 | 1006   | 4025   | 3.08245539  | 0.080478974 |
| <b>Irf5</b>     | -12.70798292 | 474    | 1896   | 3.069498375 | 0.196248346 |
| <b>Ddx58</b>    | -9.738865521 | 9106   | 36424  | 3.059703995 | 0.071465737 |
| <b>Slfn9</b>    | -10.30470459 | 5195   | 20780  | 3.038544288 | 0.321671139 |
| <b>Oas1e</b>    | -16.3476759  | 11     | 44     | 2.997231269 | 0.100797624 |
| <b>AI607873</b> | -9.803095719 | 8238   | 32951  | 2.971475925 | 0.121307958 |
| <b>H2-T22</b>   | -8.016100038 | 47806  | 191222 | 2.915747175 | 0.066277365 |
| <b>Ifi27l2a</b> | -10.33742312 | 4645   | 18579  | 2.902136086 | 0.033676522 |
| <b>Psmb10</b>   | -11.02437929 | 2334   | 9334   | 2.894983837 | 0.058373607 |
| <b>Parp12</b>   | -10.45691862 | 4100   | 16402  | 2.88798686  | 0.053691396 |
| <b>Ifi205</b>   | -11.01035929 | 2355   | 9419   | 2.880938473 | 0.036602648 |
| <b>Ifi35</b>    | -10.31399814 | 4636   | 18545  | 2.844522487 | 0.034548901 |
| <b>Bmp10</b>    | -16.42609029 | 9      | 37     | 2.84040249  | 0.083865352 |
| <b>Tmprss2</b>  | -16.42609029 | 9      | 37     | 2.84040249  | 0.083865352 |
| <b>Cfb</b>      | -10.85049483 | 2698   | 10792  | 2.830852992 | 0.036252363 |
| <b>Irf9</b>     | -9.757023751 | 7937   | 31749  | 2.801864919 | 0.034707774 |
| <b>Slc13a1</b>  | -15.64193086 | 22     | 87     | 2.799283441 | 0.170892291 |
| <b>Parp10</b>   | -9.304488232 | 12358  | 49432  | 2.777784411 | 0.041060104 |
| <b>Parp11</b>   | -10.28186214 | 4613   | 18451  | 2.76164992  | 0.034550829 |
| <b>Helz2</b>    | -10.09381896 | 5536   | 22143  | 2.739508181 | 0.126311716 |
| <b>Inmt</b>     | -16.48023683 | 8      | 33     | 2.732109415 | 0.086260313 |
| <b>Xaf1</b>     | -9.385039132 | 11170  | 44682  | 2.730237996 | 0.064287205 |
| <b>Nmi</b>      | -11.24340461 | 1714   | 6858   | 2.700158522 | 0.038863745 |
| <b>Cyp26c1</b>  | -14.57782473 | 59     | 237    | 2.665732612 | 0.076329952 |
| <b>Ifitm3</b>   | -8.633568387 | 22903  | 91611  | 2.659180921 | 0.038374651 |
| <b>Mndal</b>    | -9.682977943 | 7973   | 31892  | 2.634661485 | 0.096410743 |
| <b>Ednrb</b>    | -16.53076788 | 8      | 33     | 2.631047323 | 0.267202351 |
| <b>Btc</b>      | -12.80881883 | 348    | 1394   | 2.601876322 | 0.241433749 |
| <b>Irf4</b>     | -16.55710801 | 7      | 28     | 2.578367065 | 0.088058499 |
| <b>Ifi203</b>   | -7.668783161 | 58394  | 233575 | 2.575761631 | 0.110346221 |
| <b>Tor3a</b>    | -9.573097408 | 8670   | 34682  | 2.574645191 | 0.10799567  |
| <b>Spats2l</b>  | -14.91734588 | 40     | 162    | 2.562054451 | 0.119375656 |
| <b>Piwil4</b>   | -15.53687762 | 21     | 84     | 2.539386294 | 0.088796611 |
| <b>Pax5</b>     | -15.07984584 | 34     | 135    | 2.537159119 | 0.088271563 |
| <b>Hrh2</b>     | -16.23137982 | 10     | 40     | 2.53667626  | 0.099704947 |

|                      |              |       |        |             |             |
|----------------------|--------------|-------|--------|-------------|-------------|
| <b>Apol10a</b>       | -16.02864726 | 12    | 50     | 2.53667626  | 0.09685576  |
| <b>Olfr99</b>        | -15.88480623 | 15    | 60     | 2.53667626  | 0.172762683 |
| <b>Epsti1</b>        | -15.14143734 | 31    | 125    | 2.519336639 | 0.080846329 |
| <b>Calcb</b>         | -14.72204183 | 48    | 191    | 2.510829798 | 0.074882774 |
| <b>C2</b>            | -16.59937709 | 7     | 27     | 2.4938289   | 0.183215084 |
| <b>Rasgef1b</b>      | -16.60335595 | 6     | 26     | 2.485871172 | 0.1325207   |
| <b>Apol11b</b>       | -16.26841237 | 9     | 37     | 2.462611164 | 0.096067745 |
| <b>Irf1</b>          | -9.815440587 | 6575  | 26300  | 2.460176958 | 0.235998986 |
| <b>Gm12185</b>       | -12.17154689 | 613   | 2452   | 2.452080438 | 0.068694255 |
| <b>Mov10</b>         | -9.220816414 | 11624 | 46495  | 2.419998164 | 0.175574922 |
| <b>Casp1</b>         | -14.86270901 | 40    | 159    | 2.411816989 | 0.081011567 |
| <b>C130026I21Rik</b> | -11.45479484 | 1232  | 4926   | 2.409658483 | 0.080762307 |
| <b>Il15</b>          | -11.60131775 | 1073  | 4292   | 2.408941656 | 0.174663313 |
| <b>4-Sep</b>         | -14.55799877 | 54    | 217    | 2.402198265 | 0.111837736 |
| <b>Znfx1</b>         | -9.173031145 | 11976 | 47902  | 2.398849049 | 0.0674628   |
| <b>Cd274</b>         | -12.02267382 | 696   | 2782   | 2.380136729 | 0.204941235 |
| <b>Oas1d</b>         | -16.65847428 | 6     | 23     | 2.375634511 | 0.124090217 |
| <b>4930579F01Rik</b> | -15.8608552  | 14    | 56     | 2.361434773 | 0.14045595  |
| <b>Tapbp</b>         | -8.130705172 | 33671 | 134684 | 2.360506919 | 0.154778391 |
| <b>Kcnh4</b>         | -16.32123964 | 8     | 33     | 2.356956617 | 0.085998144 |
| <b>Dock10</b>        | -14.48753762 | 57    | 228    | 2.335481195 | 0.150767765 |
| <b>H2-Q10</b>        | -11.06799658 | 1732  | 6926   | 2.314318987 | 0.039857383 |
| <b>Oas1h</b>         | -15.35271056 | 23    | 92     | 2.279111751 | 0.111681567 |
| <b>Dusp28</b>        | -16.71426017 | 5     | 20     | 2.264062735 | 0.101551395 |
| <b>Apol7e</b>        | -14.70177041 | 44    | 178    | 2.263690573 | 0.158860249 |
| <b>Apol6</b>         | -13.10410831 | 223   | 891    | 2.199545552 | 0.267353144 |
| <b>Hdc</b>           | -14.25364446 | 68    | 272    | 2.194861574 | 0.147722386 |
| <b>Gm7030</b>        | -10.20664912 | 3871  | 15485  | 2.176675288 | 0.041513709 |
| <b>Trex1</b>         | -10.86564478 | 1984  | 7936   | 2.154512565 | 0.042802594 |
| <b>Gm8909</b>        | -10.61361713 | 2547  | 10189  | 2.149659718 | 0.040011988 |
| <b>H2-Q1</b>         | -10.02885092 | 4559  | 18236  | 2.141230205 | 0.044521347 |
| <b>A530032D15Rik</b> | -12.08410964 | 584   | 2337   | 2.139734039 | 0.060612817 |
| <b>Eif2ak2</b>       | -9.515022477 | 7603  | 30413  | 2.1358342   | 0.047471495 |
| <b>Erap1</b>         | -10.31249433 | 3414  | 13655  | 2.131252233 | 0.034846535 |
| <b>Capn13</b>        | -14.42648522 | 55    | 220    | 2.12111376  | 0.103325086 |
| <b>Fbxo39</b>        | -16.78618069 | 4     | 17     | 2.120221699 | 0.100108883 |
| <b>Srms</b>          | -16.78618069 | 4     | 17     | 2.120221699 | 0.100736435 |
| <b>H2-Q2</b>         | -13.07920558 | 212   | 849    | 2.107027791 | 0.060447774 |
| <b>Cnksr1</b>        | -15.0032161  | 31    | 123    | 2.102631945 | 0.124679633 |
| <b>H2-BI</b>         | -12.02281184 | 610   | 2440   | 2.095870237 | 0.069066483 |
| <b>H2-Q6</b>         | -10.63747144 | 2434  | 9734   | 2.095207754 | 0.046016655 |
| <b>Ly6c2</b>         | -10.69574879 | 2296  | 9183   | 2.084458748 | 0.043084193 |
| <b>Ly6c1</b>         | -8.074328745 | 31616 | 126463 | 2.083079472 | 0.050697887 |
| <b>Plekha4</b>       | -13.98817862 | 83    | 333    | 2.063736661 | 0.06876492  |
| <b>Tmem140</b>       | -11.05728364 | 1574  | 6298   | 2.049236661 | 0.041393709 |
| <b>H2-Q7</b>         | -9.141370205 | 10663 | 42652  | 2.04745132  | 0.048438474 |
| <b>Ntf3</b>          | -13.66915053 | 114   | 456    | 2.044363731 | 0.064130259 |

|                      |              |        |        |             |             |
|----------------------|--------------|--------|--------|-------------|-------------|
| <b>Hs3st3a1</b>      | -14.40059112 | 54     | 218    | 2.039370564 | 0.091412994 |
| <b>1700123I01Rik</b> | -16.13366324 | 9      | 35     | 2.038962234 | 0.078305881 |
| <b>Slc6a1</b>        | -16.84196658 | 4      | 15     | 2.008649923 | 0.103512738 |
| <b>Pla1a</b>         | -13.66947991 | 114    | 456    | 2.000993851 | 0.158352415 |
| <b>BC147527</b>      | -14.28455235 | 60     | 240    | 1.999514392 | 0.068269128 |
| <b>Ly6i</b>          | -12.58372083 | 330    | 1322   | 1.978777854 | 0.051355781 |
| <b>Mnda</b>          | -8.980121077 | 12310  | 49240  | 1.963434446 | 0.170875346 |
| <b>H2-D1</b>         | -7.762697467 | 40974  | 163897 | 1.963394064 | 0.047059595 |
| <b>H2-T3</b>         | -16.5209627  | 6      | 22     | 1.957510499 | 0.108544865 |
| <b>Gm11127</b>       | -9.998652663 | 4350   | 17402  | 1.950314127 | 0.035417143 |
| <b>Slc22a30</b>      | -16.52877583 | 6      | 22     | 1.941884227 | 0.134490996 |
| <b>Spaca1</b>        | -16.87534942 | 4      | 14     | 1.941884227 | 0.11404955  |
| <b>Ly6a</b>          | -6.507472366 | 142268 | 569070 | 1.939695119 | 0.035083031 |
| <b>Tnfsf10</b>       | -12.26018102 | 455    | 1821   | 1.938164135 | 0.122203248 |
| <b>Ccdc146</b>       | -14.36555915 | 54     | 218    | 1.937584253 | 0.113045336 |
| <b>Cngb3</b>         | -14.41341445 | 52     | 208    | 1.924111758 | 0.100968899 |
| <b>Casp4</b>         | -14.31842525 | 58     | 230    | 1.919934137 | 0.11851638  |
| <b>Tmem106a</b>      | -11.0471058  | 1505   | 6019   | 1.918847405 | 0.035204414 |
| <b>B2m</b>           | -7.351106504 | 60356  | 241424 | 1.90437979  | 0.036863133 |
| <b>Patl2</b>         | -7.347395712 | 60567  | 242267 | 1.903797014 | 0.036872148 |
| <b>Fat3</b>          | -14.7237085  | 37     | 148    | 1.888457244 | 0.095387183 |
| <b>Kcng2</b>         | -14.02043945 | 75     | 301    | 1.883383181 | 0.07343388  |
| <b>H2-K1</b>         | -11.44064417 | 1002   | 4006   | 1.882662042 | 0.042016559 |
| <b>Ifi204</b>        | -8.825581887 | 13886  | 55543  | 1.872655252 | 0.170843272 |
| <b>Gm6034</b>        | -9.927300781 | 4528   | 18110  | 1.868693775 | 0.035216569 |
| <b>Mb</b>            | -14.66511652 | 40     | 158    | 1.862540374 | 0.136099472 |
| <b>Daxx</b>          | -9.455924162 | 7226   | 28903  | 1.858844815 | 0.03465362  |
| <b>Gm5431</b>        | -11.97096841 | 589    | 2357   | 1.856350824 | 0.058687333 |
| <b>Usp17lb</b>       | -15.22208328 | 22     | 87     | 1.847219133 | 0.087136739 |
| <b>Sult6b1</b>       | -14.01049839 | 75     | 301    | 1.807955114 | 0.162826889 |
| <b>Apol7a</b>        | -11.60092015 | 852    | 3406   | 1.794466353 | 0.214570835 |
| <b>Ntm</b>           | -14.27771626 | 56     | 225    | 1.79004302  | 0.102302223 |
| <b>Ifi202b</b>       | -7.825958406 | 36186  | 144746 | 1.779156565 | 0.115236834 |
| <b>Pyhin1</b>        | -14.1662616  | 64     | 255    | 1.776563569 | 0.107254326 |
| <b>Vmn2r47</b>       | -16.06358775 | 8      | 34     | 1.773648108 | 0.085594291 |
| <b>Kif5c</b>         | -13.13403139 | 178    | 712    | 1.769129647 | 0.10667534  |
| <b>Adar</b>          | -8.412385198 | 19806  | 79225  | 1.760014436 | 0.05586109  |
| <b>Lgals9</b>        | -8.281650935 | 22456  | 89822  | 1.749346782 | 0.038475182 |
| <b>Dll1</b>          | -14.48762794 | 44     | 178    | 1.747513894 | 0.084066786 |
| <b>Mup15</b>         | -15.2399717  | 20     | 82     | 1.746903766 | 0.091618735 |
| <b>Psme1</b>         | -10.33751384 | 2872   | 11490  | 1.740892787 | 0.048667785 |
| <b>Aire</b>          | -14.41151992 | 54     | 216    | 1.739644526 | 0.22034093  |
| <b>Tbxas1</b>        | -16.28356852 | 6      | 26     | 1.739151673 | 0.087262443 |
| <b>Tnfrsf14</b>      | -14.45851011 | 46     | 183    | 1.738610254 | 0.078757618 |
| <b>Psme2</b>         | -8.509072611 | 17752  | 71009  | 1.727987392 | 0.039894949 |
| <b>Dennd6b</b>       | -12.07645255 | 498    | 1992   | 1.711776415 | 0.054544081 |
| <b>Igf2bp1</b>       | -14.15177955 | 62     | 247    | 1.705444216 | 0.080612476 |

|                       |              |       |        |             |             |
|-----------------------|--------------|-------|--------|-------------|-------------|
| <b>Mitd1</b>          | -10.91404614 | 1586  | 6342   | 1.704645352 | 0.033985489 |
| <b>Samhd1</b>         | -9.162283884 | 9286  | 37142  | 1.697340371 | 0.132936199 |
| <b>Rnf135</b>         | -11.42248968 | 956   | 3826   | 1.685726196 | 0.076579424 |
| <b>6030498E09Rik</b>  | -14.08458343 | 65    | 261    | 1.679871805 | 0.07681373  |
| <b>9930111J21Rik2</b> | -10.15537678 | 3373  | 13491  | 1.66914935  | 0.074249975 |
| <b>Psme2b</b>         | -10.99488123 | 1444  | 5777   | 1.667150842 | 0.035447461 |
| <b>Serpinb9e</b>      | -16.32210619 | 6     | 24     | 1.662076333 | 0.084087543 |
| <b>Tdrd7</b>          | -9.594289522 | 5834  | 23338  | 1.652439446 | 0.037562422 |
| <b>Slfn4</b>          | -13.41504876 | 128   | 510    | 1.652405934 | 0.068345021 |
| <b>9930111J21Rik1</b> | -9.945763523 | 4113  | 16452  | 1.644297515 | 0.064749784 |
| <b>Rnasel</b>         | -12.15238714 | 453   | 1811   | 1.628595854 | 0.109884677 |
| <b>Wisp2</b>          | -11.91408057 | 571   | 2285   | 1.622891958 | 0.092893548 |
| <b>3110062M04Rik</b>  | -10.28752663 | 2888  | 11554  | 1.613080501 | 0.042128964 |
| <b>Trafd1</b>         | -9.751935119 | 4895  | 19580  | 1.602929721 | 0.035044436 |
| <b>Clec2d</b>         | -10.47894564 | 2401  | 9603   | 1.60171296  | 0.132461023 |
| <b>Apobec1</b>        | -10.32499919 | 2770  | 11080  | 1.599726037 | 0.048680431 |
| <b>Mkl</b>            | -9.664302765 | 5341  | 21364  | 1.599505795 | 0.040112262 |
| <b>Prl2c1</b>         | -13.84791494 | 82    | 329    | 1.596495752 | 0.172986496 |
| <b>Isg20</b>          | -9.447454658 | 6704  | 26815  | 1.591460074 | 0.12241454  |
| <b>Rnf31</b>          | -11.04917842 | 1327  | 5307   | 1.58070731  | 0.036166169 |
| <b>Prl2c5</b>         | -13.42897707 | 124   | 494    | 1.572701834 | 0.121627465 |
| <b>Sp140</b>          | -10.25327097 | 2908  | 11634  | 1.534134798 | 0.05434528  |
| <b>Xdh</b>            | -9.594524369 | 5624  | 22494  | 1.521448527 | 0.087840519 |
| <b>Pnpt1</b>          | -9.616093379 | 5451  | 21803  | 1.520610923 | 0.041935119 |
| <b>Gsdmd</b>          | -15.35604811 | 17    | 67     | 1.514750962 | 0.096677874 |
| <b>Tor1aip1</b>       | -8.169634501 | 23078 | 92313  | 1.510895662 | 0.036050073 |
| <b>Crispld2</b>       | -14.40067086 | 45    | 179    | 1.497613817 | 0.107395438 |
| <b>Ifitm1</b>         | -15.19650358 | 20    | 78     | 1.49291343  | 0.084504286 |
| <b>Lck</b>            | -14.53913161 | 38    | 153    | 1.49035588  | 0.06455837  |
| <b>Trim15</b>         | -14.35050835 | 46    | 186    | 1.482178044 | 0.081726948 |
| <b>Corin</b>          | -14.18394726 | 55    | 220    | 1.481144148 | 0.082213756 |
| <b>Pml</b>            | -9.073824746 | 9452  | 37810  | 1.480335023 | 0.139290323 |
| <b>Fmo3</b>           | -13.86091622 | 77    | 309    | 1.478510806 | 0.09741543  |
| <b>Aox1</b>           | -11.5838666  | 750   | 3000   | 1.474039242 | 0.046686103 |
| <b>Glb1l3</b>         | -14.34809012 | 46    | 186    | 1.466973757 | 0.081749069 |
| <b>Lgals8</b>         | -7.551303963 | 42275 | 169099 | 1.461117765 | 0.062071424 |
| <b>Fbxw24</b>         | -15.76259455 | 10    | 42     | 1.459343779 | 0.078044849 |
| <b>H2-T23</b>         | -8.97556655  | 10142 | 40567  | 1.447215843 | 0.05605909  |
| <b>Tcirg1</b>         | -8.366756452 | 18490 | 73960  | 1.426675963 | 0.050901316 |
| <b>Serpinb9</b>       | -10.02608274 | 3502  | 14010  | 1.422126859 | 0.034468633 |
| <b>H2-M3</b>          | -11.56835429 | 747   | 2988   | 1.414476583 | 0.04991142  |
| <b>Aim1</b>           | -12.68249271 | 248   | 992    | 1.407609595 | 0.128429327 |
| <b>Fbxw17</b>         | -11.34696416 | 932   | 3727   | 1.404112443 | 0.055495015 |
| <b>Adamts6</b>        | -11.88494007 | 538   | 2152   | 1.379627224 | 0.04650718  |
| <b>Pglyrp1</b>        | -15.77280005 | 10    | 40     | 1.37439426  | 0.068671201 |
| <b>Adcy8</b>          | -15.08845961 | 21    | 84     | 1.372529136 | 0.0826858   |
| <b>Aldh3a1</b>        | -9.831338127 | 4216  | 16862  | 1.35976181  | 0.050432018 |

|                      |              |       |       |             |             |
|----------------------|--------------|-------|-------|-------------|-------------|
| <b>Apobec3</b>       | -10.7852668  | 1630  | 6520  | 1.348180311 | 0.115591181 |
| <b>C1rb</b>          | -11.22418296 | 1026  | 4103  | 1.333509344 | 0.037842585 |
| <b>Zc3hav1</b>       | -8.88884482  | 10765 | 43061 | 1.331691692 | 0.115227342 |
| <b>C1ra</b>          | -10.42414313 | 2276  | 9103  | 1.320123003 | 0.033308004 |
| <b>Pappa2</b>        | -13.25821363 | 133   | 533   | 1.312889086 | 0.07804911  |
| <b>Agrn</b>          | -9.071050956 | 8760  | 35038 | 1.296104231 | 0.040543431 |
| <b>Tgm2</b>          | -9.991735611 | 3494  | 13977 | 1.293346571 | 0.052513035 |
| <b>Mup2</b>          | -13.35645776 | 119   | 477   | 1.286641811 | 0.065831859 |
| <b>Celsr1</b>        | -15.50718174 | 13    | 52    | 1.277022222 | 0.072079725 |
| <b>Trim69</b>        | -14.57143454 | 34    | 138   | 1.276714435 | 0.063176656 |
| <b>Ankrd37</b>       | -13.87163869 | 72    | 289   | 1.274744314 | 0.104023743 |
| <b>Bco2</b>          | -14.88512313 | 25    | 101   | 1.268376473 | 0.099605536 |
| <b>Atp10a</b>        | -10.44239769 | 2197  | 8787  | 1.267372103 | 0.032380628 |
| <b>Shisa5</b>        | -8.150876894 | 21721 | 86883 | 1.262825739 | 0.034564565 |
| <b>Rimbp2</b>        | -14.36860727 | 42    | 169   | 1.251586057 | 0.072950343 |
| <b>Adgb</b>          | -14.41984031 | 40    | 160   | 1.247100384 | 0.066054443 |
| <b>Mettl21e</b>      | -14.66957242 | 32    | 127   | 1.229474263 | 0.114764856 |
| <b>Pnp</b>           | -9.772263555 | 4254  | 17014 | 1.229258396 | 0.037576439 |
| <b>Insl6</b>         | -11.9679893  | 476   | 1903  | 1.220595929 | 0.082721217 |
| <b>Apol7c</b>        | -15.04646299 | 21    | 83    | 1.217630454 | 0.06660494  |
| <b>Phactr1</b>       | -11.01824306 | 1239  | 4957  | 1.213648684 | 0.10658826  |
| <b>Zfp619</b>        | -12.77383709 | 210   | 840   | 1.209400192 | 0.077264889 |
| <b>1700093K21Rik</b> | -14.57221375 | 34    | 136   | 1.205821328 | 0.091270284 |
| <b>Rbm43</b>         | -10.42744774 | 2186  | 8743  | 1.196780463 | 0.034146098 |
| <b>Lrrd1</b>         | -13.23236775 | 133   | 531   | 1.195162703 | 0.096393697 |
| <b>Pnp2</b>          | -10.78815657 | 1516  | 6062  | 1.177406404 | 0.035944412 |
| <b>Ptprh</b>         | -14.58453723 | 33    | 132   | 1.176401078 | 0.062037755 |
| <b>Ip6k3</b>         | -13.46129567 | 104   | 417   | 1.174604448 | 0.072462343 |
| <b>Il12rb1</b>       | -14.8276926  | 26    | 103   | 1.169663416 | 0.069976287 |
| <b>Cldn23</b>        | -14.07075877 | 56    | 226   | 1.164186223 | 0.101323309 |
| <b>Omp</b>           | -14.33568782 | 43    | 171   | 1.157576268 | 0.078720148 |
| <b>Trim56</b>        | -11.18442631 | 1013  | 4051  | 1.152466673 | 0.04023263  |
| <b>Hist1h2bc</b>     | -9.886347045 | 3736  | 14946 | 1.143902403 | 0.065184898 |
| <b>Usp25</b>         | -9.83399745  | 3895  | 15581 | 1.140838631 | 0.035418102 |
| <b>Il15ra</b>        | -12.72770818 | 215   | 859   | 1.140555114 | 0.055608632 |
| <b>Spaca6</b>        | -11.7194193  | 594   | 2377  | 1.135195813 | 0.059689526 |
| <b>Trim14</b>        | -12.53245986 | 262   | 1048  | 1.119591577 | 0.075852056 |
| <b>Vwa5a</b>         | -9.103978393 | 8069  | 32276 | 1.107585212 | 0.054319476 |
| <b>Dapp1</b>         | -11.69686696 | 604   | 2416  | 1.105220285 | 0.077203465 |
| <b>Ovol1</b>         | -14.66664384 | 30    | 119   | 1.101800025 | 0.070419339 |
| <b>Pnpla7</b>        | -11.74965071 | 564   | 2256  | 1.087497712 | 0.04277972  |
| <b>Acacb</b>         | -12.24226456 | 346   | 1386  | 1.068704083 | 0.080660251 |
| <b>Dcp2</b>          | -10.31217118 | 2372  | 9488  | 1.063564579 | 0.045449105 |
| <b>Hist1h2bh</b>     | -11.87154794 | 499   | 1997  | 1.059250457 | 0.064340747 |
| <b>Hist1h2ba</b>     | -12.50966311 | 264   | 1055  | 1.056784931 | 0.077985077 |
| <b>Nampt</b>         | -9.023200599 | 8594  | 34377 | 1.055116938 | 0.05786398  |
| <b>Slfn3</b>         | -11.78496904 | 540   | 2162  | 1.052388194 | 0.049717704 |

|                  |              |        |         |             |             |
|------------------|--------------|--------|---------|-------------|-------------|
| <b>Ubc</b>       | -5.19750198  | 392880 | 1571518 | 1.050954349 | 0.039551337 |
| <b>Nqo1</b>      | -9.604636773 | 4815   | 19260   | 1.043500033 | 0.06515886  |
| <b>Nlgn2</b>     | -10.4593484  | 2056   | 8224    | 1.042453217 | 0.078750893 |
| <b>Foxf1</b>     | -12.08673035 | 398    | 1590    | 1.040989681 | 0.048009122 |
| <b>Hist1h2be</b> | -10.37735897 | 2221   | 8885    | 1.037953696 | 0.06099103  |
| <b>Hist1h2bl</b> | -11.57598338 | 668    | 2673    | 1.030474715 | 0.071878815 |
| <b>Syt8</b>      | -11.32390644 | 859    | 3436    | 1.02961595  | 0.069069415 |
| <b>Hist1h2bj</b> | -12.12831729 | 384    | 1534    | 1.022035399 | 0.076386636 |
| <b>Tor1aip2</b>  | -7.396010737 | 43578  | 174313  | 1.021328976 | 0.077608239 |
| <b>Hist1h2bf</b> | -11.75673189 | 556    | 2226    | 1.020015705 | 0.078168327 |
| <b>Hist1h2bq</b> | -10.7018938  | 1600   | 6398    | 1.01876238  | 0.067319155 |
| <b>Hist1h2br</b> | -10.7018938  | 1600   | 6398    | 1.01876238  | 0.067319155 |
| <b>Pcdh15</b>    | -11.72017313 | 574    | 2296    | 1.01320886  | 0.077707528 |
| <b>Gbp8</b>      | -11.24186232 | 933    | 3731    | 1.009810406 | 0.07726973  |
| <b>Plekha2</b>   | -10.65469679 | 1676   | 6702    | 1.005811886 | 0.078617709 |
| <b>Rnf114</b>    | -9.918269025 | 3450   | 13798   | 0.99700792  | 0.041462144 |
| <b>Rnpepl1</b>   | -11.84765822 | 502    | 2010    | 0.994067396 | 0.063272053 |
| <b>Trim26</b>    | -8.717150108 | 11557  | 46227   | 0.993114208 | 0.08046427  |
| <b>Arc</b>       | -12.43122676 | 280    | 1120    | 0.992514741 | 0.072592476 |
| <b>Pcgf5</b>     | -10.54113227 | 1846   | 7382    | 0.992481161 | 0.039906312 |
| <b>Hist1h2bg</b> | -11.29194196 | 878    | 3510    | 0.992458234 | 0.062954847 |
| <b>Enpp4</b>     | -10.32854625 | 2296   | 9183    | 0.9907208   | 0.049211343 |
| <b>Hist1h2bn</b> | -11.83465589 | 511    | 2043    | 0.984132603 | 0.082909317 |
| <b>Tnnt3</b>     | -12.01868904 | 420    | 1680    | 0.983810712 | 0.055282358 |
| <b>Osgin1</b>    | -12.20187405 | 348    | 1394    | 0.976288772 | 0.050615317 |
| <b>Ogfr</b>      | -9.427584504 | 5620   | 22481   | 0.971484064 | 0.060880357 |
| <b>Srxn1</b>     | -9.465634042 | 5418   | 21671   | 0.971465663 | 0.05561363  |
| <b>Rhobtb2</b>   | -11.27035981 | 886    | 3543    | 0.970739447 | 0.043914857 |
| <b>Hist1h2bk</b> | -11.62765202 | 626    | 2502    | 0.970470807 | 0.075713986 |
| <b>Islr</b>      | -12.9995071  | 158    | 634     | 0.967412194 | 0.080193016 |
| <b>Idnk</b>      | -10.95165349 | 1218   | 4870    | 0.964319264 | 0.041449672 |
| <b>Hist1h2bp</b> | -11.06241169 | 1095   | 4379    | 0.956128608 | 0.061439804 |
| <b>Snca</b>      | -12.11076717 | 383    | 1532    | 0.954106762 | 0.069485685 |
| <b>Amer1</b>     | -11.27452024 | 885    | 3540    | 0.952685108 | 0.067754324 |
| <b>Cmtr1</b>     | -9.058182726 | 8043   | 32172   | 0.95172036  | 0.033913517 |
| <b>Etnk1</b>     | -9.143153383 | 7372   | 29489   | 0.941940569 | 0.036287743 |
| <b>Myo7a</b>     | -9.031843128 | 8260   | 33042   | 0.93698176  | 0.043745505 |
| <b>Cacna2d3</b>  | -12.96963796 | 160    | 639     | 0.930100941 | 0.065031025 |
| <b>Slc25a22</b>  | -10.22111735 | 2497   | 9989    | 0.922771955 | 0.033693742 |
| <b>Asb13</b>     | -11.45994928 | 722    | 2886    | 0.913336488 | 0.041236784 |
| <b>Spag16</b>    | -12.87133369 | 175    | 700     | 0.910600915 | 0.05931765  |
| <b>Hist1h2bm</b> | -12.44916268 | 268    | 1074    | 0.90183112  | 0.066727569 |
| <b>Sptlc2</b>    | -9.516370708 | 5021   | 20084   | 0.896199137 | 0.037219692 |
| <b>Nell1</b>     | -12.57388702 | 235    | 939     | 0.890488215 | 0.05254359  |
| <b>Vmn2r60</b>   | -13.2733678  | 116    | 465     | 0.886389277 | 0.067454613 |
| <b>Zfhx2</b>     | -11.89944648 | 463    | 1852    | 0.883291476 | 0.056737551 |
| <b>Stxbp1</b>    | -9.317219593 | 6152   | 24608   | 0.869905669 | 0.063304579 |



|                      |              |       |        |             |             |
|----------------------|--------------|-------|--------|-------------|-------------|
| <b>Cfh</b>           | -11.2380666  | 892   | 3570   | 0.859159412 | 0.044215038 |
| <b>Ikbke</b>         | -11.8501477  | 485   | 1939   | 0.854332055 | 0.059265194 |
| <b>Zdhhc18</b>       | -10.66861198 | 1568  | 6273   | 0.851085899 | 0.034204861 |
| <b>Aida</b>          | -9.242466091 | 6533  | 26132  | 0.847429402 | 0.035179681 |
| <b>Ccdc167</b>       | -9.521518432 | 4935  | 19739  | 0.845640893 | 0.033287776 |
| <b>Zcchc6</b>        | -9.503700178 | 5023  | 20092  | 0.83644761  | 0.036037443 |
| <b>Nub1</b>          | -8.826046906 | 9926  | 39704  | 0.836404158 | 0.054278725 |
| <b>Pdgfrb</b>        | -8.358182524 | 15806 | 63226  | 0.82939389  | 0.044159598 |
| <b>Jade2</b>         | -10.35184009 | 2166  | 8662   | 0.826751963 | 0.062429579 |
| <b>Bnip3</b>         | -10.26962803 | 2351  | 9405   | 0.825253934 | 0.04770952  |
| <b>Masp1</b>         | -12.04543215 | 393   | 1571   | 0.82491062  | 0.047722747 |
| <b>Asah2</b>         | -10.60572521 | 1680  | 6722   | 0.822678319 | 0.063985515 |
| <b>Pgd</b>           | -9.062509141 | 7746  | 30984  | 0.792207722 | 0.041780953 |
| <b>Sycp3</b>         | -10.93501222 | 1189  | 4755   | 0.789962437 | 0.042351506 |
| <b>Nt5c3</b>         | -9.658008485 | 4262  | 17049  | 0.780857656 | 0.047134463 |
| <b>Greb1l</b>        | -12.08927208 | 373   | 1492   | 0.7808212   | 0.051858696 |
| <b>Atm</b>           | -10.26911719 | 2310  | 9242   | 0.767450209 | 0.046254595 |
| <b>Angpt1</b>        | -10.42416071 | 1977  | 7908   | 0.766826158 | 0.043251013 |
| <b>Mill2</b>         | -11.84133546 | 474   | 1896   | 0.747539976 | 0.04456846  |
| <b>Arel1</b>         | -10.12395325 | 2654  | 10614  | 0.746724974 | 0.040959214 |
| <b>Whamm</b>         | -11.4329966  | 715   | 2859   | 0.744969968 | 0.050028792 |
| <b>Ehd4</b>          | -10.49935323 | 1826  | 7306   | 0.743450628 | 0.04791263  |
| <b>Papd7</b>         | -9.547173098 | 4704  | 18816  | 0.738819605 | 0.034434784 |
| <b>Tmco4</b>         | -11.82392518 | 480   | 1921   | 0.723645961 | 0.047653759 |
| <b>Ddx24</b>         | -8.549605733 | 12750 | 50998  | 0.723352911 | 0.048056849 |
| <b>Grik3</b>         | -12.31309665 | 294   | 1176   | 0.721555304 | 0.050286589 |
| <b>Chpt1</b>         | -8.61479922  | 11865 | 47460  | 0.700049972 | 0.035655126 |
| <b>Tnnt2</b>         | -9.251825647 | 6268  | 25070  | 0.694996763 | 0.036054649 |
| <b>Cox18</b>         | -10.39062359 | 2005  | 8020   | 0.692389617 | 0.033910225 |
| <b>Tmem184b</b>      | -7.959412056 | 22856 | 91424  | 0.691897702 | 0.039918484 |
| <b>Cutc</b>          | -11.60048936 | 596   | 2386   | 0.691809646 | 0.04123963  |
| <b>Stard3</b>        | -10.92383213 | 1176  | 4702   | 0.688154006 | 0.037816102 |
| <b>Fndc3a</b>        | -9.836475152 | 3488  | 13951  | 0.684623013 | 0.040100812 |
| <b>Pmepa1</b>        | -10.05234969 | 2804  | 11217  | 0.682040354 | 0.033181193 |
| <b>Zufsp</b>         | -11.27703176 | 824   | 3297   | 0.678595709 | 0.046131844 |
| <b>N4bp1</b>         | -9.699797089 | 3980  | 15921  | 0.668453283 | 0.035210021 |
| <b>A630033H2ORik</b> | -10.54643572 | 1703  | 6811   | 0.654298014 | 0.034121766 |
| <b>Smg7</b>          | -8.952468285 | 8369  | 33475  | 0.646980509 | 0.034595474 |
| <b>Esd</b>           | -7.166489124 | 50006 | 200022 | 0.646097636 | 0.04166059  |
| <b>Zcchc2</b>        | -9.465129117 | 5014  | 20058  | 0.6443709   | 0.03838473  |
| <b>Sema3a</b>        | -8.150256722 | 18635 | 74539  | 0.636229513 | 0.035909259 |
| <b>Map2k1</b>        | -9.318676728 | 5783  | 23131  | 0.623473599 | 0.037740865 |
| <b>Fam46a</b>        | -10.43718391 | 1886  | 7544   | 0.619196889 | 0.032656784 |
| <b>Mrpl30</b>        | -9.959053593 | 3029  | 12117  | 0.594370461 | 0.03333178  |
| <b>Elf1</b>          | -8.713982735 | 10518 | 42074  | 0.588408916 | 0.036245025 |
| <b>Gbe1</b>          | -10.02087287 | 2844  | 11375  | 0.583826034 | 0.032723327 |
| <b>Lsp1</b>          | -8.754313248 | 10097 | 40389  | 0.582278347 | 0.0353999   |

|                  |              |       |        |              |             |
|------------------|--------------|-------|--------|--------------|-------------|
| <b>Aldoa</b>     | -6.551129371 | 91362 | 365447 | 0.577134879  | 0.035723514 |
| <b>Atp6v0a1</b>  | -9.20772619  | 6213  | 24852  | -0.627707142 | 0.033517932 |
| <b>Gnl3l</b>     | -9.221558118 | 6128  | 24514  | -0.630897006 | 0.034645504 |
| <b>Slc12a2</b>   | -10.20003793 | 2304  | 9215   | -0.631914367 | 0.033309161 |
| <b>Tmem184c</b>  | -10.5048361  | 1699  | 6797   | -0.63873274  | 0.032796278 |
| <b>Enah</b>      | -9.439041215 | 4939  | 19756  | -0.645042643 | 0.033620614 |
| <b>Agtppb1</b>   | -9.522956181 | 4549  | 18195  | -0.651790776 | 0.036046633 |
| <b>Tenm3</b>     | -8.912022197 | 8382  | 33528  | -0.65850437  | 0.034858499 |
| <b>Flot1</b>     | -10.3085676  | 2080  | 8318   | -0.668789905 | 0.037764564 |
| <b>Etv5</b>      | -11.05723206 | 986   | 3942   | -0.693156851 | 0.040238906 |
| <b>Nop10</b>     | -10.31863049 | 2066  | 8262   | -0.695406501 | 0.036395013 |
| <b>Aktip</b>     | -9.210610475 | 6260  | 25039  | -0.708194057 | 0.034719829 |
| <b>Scand1</b>    | -10.99250183 | 1056  | 4225   | -0.726975282 | 0.038941942 |
| <b>Trp53inp1</b> | -10.31564887 | 2086  | 8346   | -0.731302304 | 0.036940539 |
| <b>Jund</b>      | -9.194581467 | 6442  | 25770  | -0.746259021 | 0.0482744   |
| <b>Lrrn3</b>     | -11.17643336 | 900   | 3600   | -0.782049472 | 0.056212306 |
| <b>Celf4</b>     | -11.75976554 | 495   | 1980   | -0.78386111  | 0.044646824 |
| <b>Otud6b</b>    | -10.32939516 | 2072  | 8287   | -0.797245155 | 0.03204298  |
| <b>Rcn2</b>      | -9.629263592 | 4191  | 16764  | -0.810621724 | 0.038269891 |
| <b>H2afj</b>     | -10.0732327  | 2715  | 10860  | -0.814756919 | 0.043780506 |
| <b>Prelp</b>     | -11.05393124 | 1007  | 4029   | -0.818005348 | 0.038513051 |
| <b>Col6a2</b>    | -9.893007772 | 3237  | 12947  | -0.835029895 | 0.040348712 |
| <b>Uggt2</b>     | -10.20821793 | 2362  | 9446   | -0.836929855 | 0.039276156 |
| <b>Lin7c</b>     | -9.960532345 | 3029  | 12115  | -0.852106328 | 0.036681516 |
| <b>Ass1</b>      | -10.05778433 | 2752  | 11007  | -0.868606496 | 0.033071816 |
| <b>Polr3g</b>    | -12.06825921 | 370   | 1482   | -0.87377135  | 0.060026287 |
| <b>Fez1</b>      | -10.14609308 | 2543  | 10172  | -0.877976262 | 0.047199813 |
| <b>Itm2a</b>     | -10.74258392 | 1410  | 5641   | -0.892127968 | 0.048798988 |
| <b>Egfl7</b>     | -12.45851238 | 250   | 1001   | -0.893207838 | 0.05784306  |
| <b>Cdkn1a</b>    | -8.640688612 | 11439 | 45756  | -0.91067004  | 0.033955796 |
| <b>Tmem184a</b>  | -13.42129884 | 95    | 381    | -0.923165665 | 0.060540002 |
| <b>Pmm1</b>      | -9.949390735 | 3212  | 12846  | -0.930986693 | 0.07219029  |
| <b>Taf13</b>     | -11.39301826 | 735   | 2941   | -0.956396111 | 0.040493947 |
| <b>Osbpl6</b>    | -11.3890844  | 743   | 2973   | -0.991898137 | 0.039910653 |
| <b>Ctsf</b>      | -12.59521545 | 228   | 914    | -1.026567896 | 0.079294265 |
| <b>Nefm</b>      | -12.06601776 | 385   | 1541   | -1.03518258  | 0.059860902 |
| <b>Pgap1</b>     | -12.85729778 | 177   | 709    | -1.067522963 | 0.080350078 |
| <b>Nipal1</b>    | -12.94295809 | 160   | 638    | -1.079086378 | 0.056502415 |
| <b>Nlrc3</b>     | -12.28013566 | 312   | 1246   | -1.08824055  | 0.05842319  |
| <b>Rhob</b>      | -9.626844068 | 4591  | 18363  | -1.094465547 | 0.086404017 |
| <b>Clu</b>       | -12.03000886 | 410   | 1640   | -1.122163245 | 0.067838031 |
| <b>Satb1</b>     | -12.5388683  | 243   | 973    | -1.12621009  | 0.072977922 |
| <b>Fam212b</b>   | -11.19913117 | 958   | 3833   | -1.157427976 | 0.066085199 |
| <b>Mturn</b>     | -12.66673016 | 226   | 902    | -1.159337362 | 0.119435052 |
| <b>Crmp1</b>     | -12.22052755 | 336   | 1346   | -1.168990497 | 0.052619403 |
| <b>Tfb2m</b>     | -10.98573344 | 1210  | 4838   | -1.187298388 | 0.092629738 |
| <b>AU021092</b>  | -12.4496426  | 277   | 1109   | -1.205535327 | 0.08079362  |

|                |              |      |       |              |             |
|----------------|--------------|------|-------|--------------|-------------|
| <b>Pcolce2</b> | -11.22054565 | 954  | 3815  | -1.240534423 | 0.063349703 |
| <b>Islr2</b>   | -15.14930506 | 18   | 70    | -1.258890074 | 0.073180882 |
| <b>Sort1</b>   | -11.10162812 | 1084 | 4336  | -1.268802805 | 0.068832988 |
| <b>Galnt18</b> | -13.82737628 | 72   | 286   | -1.301430634 | 0.115097782 |
| <b>Gap43</b>   | -15.07900267 | 19   | 77    | -1.316607193 | 0.075417137 |
| <b>Ddah2</b>   | -12.42064409 | 290  | 1162  | -1.321743067 | 0.0682187   |
| <b>Cobl</b>    | -12.98118474 | 174  | 698   | -1.357452136 | 0.121569326 |
| <b>Btg2</b>    | -11.70538197 | 601  | 2403  | -1.40211012  | 0.044845726 |
| <b>Il17d</b>   | -15.1367806  | 20   | 78    | -1.488733405 | 0.119512287 |
| <b>Camsap3</b> | -14.58901158 | 36   | 142   | -1.542817572 | 0.130891594 |
| <b>Ifi27</b>   | -9.280186131 | 7169 | 28675 | -1.591300293 | 0.035199878 |
| <b>Fhl1</b>    | -12.64342964 | 268  | 1070  | -1.647727833 | 0.114665095 |
| <b>H60b</b>    | -12.22510108 | 384  | 1535  | -1.655147489 | 0.046438708 |
| <b>Klf2</b>    | -12.87725559 | 213  | 851   | -1.701468606 | 0.136415915 |
| <b>Cldn1</b>   | -14.14107171 | 59   | 235   | -1.745550126 | 0.110435994 |
| <b>Ccdc80</b>  | -14.14644747 | 58   | 231   | -1.772950373 | 0.074516041 |
| <b>Id4</b>     | -14.24500636 | 60   | 240   | -1.778356857 | 0.230936074 |
| <b>Areg</b>    | -14.90594746 | 31   | 123   | -1.796248998 | 0.28128819  |
| <b>Fxyd1</b>   | -15.16945018 | 20   | 82    | -1.806386495 | 0.090535326 |
| <b>Ces1d</b>   | -15.71413726 | 12   | 46    | -1.815624633 | 0.087351252 |
| <b>Akr1c18</b> | -14.55866925 | 45   | 180   | -1.998328945 | 0.18565916  |
| <b>H60c</b>    | -13.60729785 | 112  | 446   | -2.07805972  | 0.065870595 |
| <b>Gm10324</b> | -16.87534942 | 4    | 14    | -2.2012505   | 0.106858666 |
| <b>Cox6b2</b>  | -16.86371942 | 4    | 15    | -2.224510507 | 0.154728921 |
| <b>Ace2</b>    | -16.74764302 | 5    | 20    | -2.456663311 | 0.195657389 |
| <b>Cldn18</b>  | -16.67042195 | 6    | 22    | -2.611105452 | 0.092799553 |

regulation in IFN $\alpha$  treated cells comp

| <b>p_value_edgeR</b> | <b>q_value_edgeR</b> |
|----------------------|----------------------|
| 7.18E-109            | 1.46E-105            |
| 2.68E-122            | 2.18E-118            |
| 2.27E-121            | 1.23E-117            |
| 3.75E-111            | 1.02E-107            |
| 9.66E-39             | 2.92E-36             |
| 5.51E-111            | 1.28E-107            |
| 2.48E-127            | 4.05E-123            |
| 2.23E-90             | 2.79E-87             |
| 1.27E-66             | 6.88E-64             |
| 2.16E-81             | 1.96E-78             |
| 1.45E-114            | 5.91E-111            |
| 3.35E-76             | 2.18E-73             |
| 3.94E-114            | 1.28E-110            |
| 5.98E-74             | 3.74E-71             |
| 1.44E-93             | 2.35E-90             |
| 5.50E-81             | 4.72E-78             |
| 2.45E-89             | 2.67E-86             |
| 1.05E-68             | 6.11E-66             |
| 6.74E-77             | 4.58E-74             |
| 4.48E-82             | 4.29E-79             |
| 2.33E-83             | 2.37E-80             |
| 1.57E-43             | 6.10E-41             |
| 1.84E-89             | 2.14E-86             |
| 4.43E-92             | 6.56E-89             |
| 1.72E-44             | 6.99E-42             |
| 3.09E-94             | 5.60E-91             |
| 1.21E-77             | 8.60E-75             |
| 1.02E-46             | 4.39E-44             |
| 6.14E-41             | 2.04E-38             |
| 2.02E-80             | 1.57E-77             |
| 1.22E-80             | 9.94E-78             |
| 2.73E-32             | 6.18E-30             |
| 2.28E-38             | 6.74E-36             |
| 1.41E-30             | 3.06E-28             |
| 1.38E-35             | 3.57E-33             |
| 5.10E-15             | 5.98E-13             |
| 2.15E-10             | 2.00E-08             |
| 1.87E-29             | 3.87E-27             |
| 4.81E-56             | 2.45E-53             |
| 4.98E-38             | 1.45E-35             |
| 1.19E-44             | 4.96E-42             |
| 6.01E-79             | 4.45E-76             |
| 7.49E-43             | 2.84E-40             |
| 1.58E-37             | 4.44E-35             |

|          |             |
|----------|-------------|
| 1.39E-91 | 1.89E-88    |
| 9.95E-57 | 5.23E-54    |
| 4.72E-71 | 2.85E-68    |
| 1.09E-50 | 5.37E-48    |
| 9.98E-42 | 3.46E-39    |
| 1.58E-19 | 2.25E-17    |
| 2.88E-48 | 1.34E-45    |
| 9.05E-11 | 8.52E-09    |
| 2.60E-19 | 3.66E-17    |
| 5.42E-32 | 1.21E-29    |
| 1.97E-20 | 2.92E-18    |
| 2.34E-42 | 8.47E-40    |
| 7.22E-38 | 2.07E-35    |
| 1.15E-36 | 3.12E-34    |
| 5.53E-08 | 4.31E-06    |
| 2.04E-35 | 5.21E-33    |
| 1.11E-14 | 1.29E-12    |
| 2.49E-30 | 5.34E-28    |
| 1.74E-27 | 3.50E-25    |
| 7.75E-49 | 3.71E-46    |
| 2.50E-20 | 3.68E-18    |
| 1.85E-22 | 3.08E-20    |
| 3.73E-67 | 2.09E-64    |
| 2.77E-16 | 3.44E-14    |
| 3.98E-48 | 1.80E-45    |
| 9.07E-43 | 3.36E-40    |
| 1.32E-22 | 2.26E-20    |
| 2.99E-31 | 6.59E-29    |
| 4.53E-19 | 6.31E-17    |
| 5.79E-16 | 7.04E-14    |
| 1.77E-11 | 1.73E-09    |
| 7.16E-34 | 1.69E-31    |
| 4.01E-18 | 5.49E-16    |
| 8.45E-21 | 1.29E-18    |
| 3.27E-35 | 8.20E-33    |
| 4.53E-30 | 9.58E-28    |
| 1.07E-17 | 1.43E-15    |
| 1.51E-06 | 0.000102554 |
| 4.63E-16 | 5.67E-14    |
| 5.40E-36 | 1.42E-33    |
| 8.89E-24 | 1.65E-21    |
| 3.58E-36 | 9.56E-34    |
| 8.44E-42 | 2.99E-39    |
| 1.70E-37 | 4.68E-35    |
| 4.20E-33 | 9.64E-31    |
| 3.71E-24 | 6.94E-22    |
| 1.47E-22 | 2.49E-20    |

|             |             |
|-------------|-------------|
| 1.43E-09    | 1.23E-07    |
| 1.43E-09    | 1.23E-07    |
| 1.69E-09    | 1.44E-07    |
| 4.21E-11    | 4.04E-09    |
| 8.60E-48    | 3.79E-45    |
| 4.10E-26    | 7.96E-24    |
| 3.76E-34    | 9.28E-32    |
| 1.40E-23    | 2.56E-21    |
| 9.56E-27    | 1.90E-24    |
| 6.03E-07    | 4.36598E-05 |
| 2.82E-12    | 2.95E-10    |
| 6.45E-30    | 1.35E-27    |
| 3.92E-20    | 5.71E-18    |
| 1.53E-08    | 1.24E-06    |
| 6.21E-23    | 1.09E-20    |
| 2.66412E-05 | 0.001427935 |
| 3.08E-08    | 2.45E-06    |
| 3.40E-13    | 3.72E-11    |
| 4.80E-23    | 8.59E-21    |
| 1.34E-43    | 5.32E-41    |
| 2.78E-25    | 5.27E-23    |
| 1.61E-27    | 3.28E-25    |
| 2.12E-39    | 6.63E-37    |
| 1.08E-41    | 3.68E-39    |
| 1.02E-07    | 7.79E-06    |
| 1.02E-07    | 7.79E-06    |
| 8.18E-39    | 2.52E-36    |
| 1.19E-40    | 3.87E-38    |
| 1.72E-06    | 0.000116078 |
| 4.29E-34    | 1.04E-31    |
| 7.63E-40    | 2.44E-37    |
| 3.25E-11    | 3.15E-09    |
| 3.27E-07    | 2.42442E-05 |
| 1.95E-21    | 3.15E-19    |
| 2.35E-33    | 5.48E-31    |
| 3.50E-13    | 3.81E-11    |
| 4.84E-34    | 1.16E-31    |
| 9.22E-14    | 1.02E-11    |
| 6.64643E-05 | 0.003271812 |
| 1.48304E-05 | 0.000827558 |
| 2.20E-06    | 0.000145407 |
| 9.85E-12    | 9.78E-10    |
| 6.44E-12    | 6.56E-10    |
| 3.14E-08    | 2.48E-06    |
| 9.01E-09    | 7.45E-07    |
| 6.96E-10    | 6.30E-08    |
| 1.32E-06    | 9.09719E-05 |

|             |             |
|-------------|-------------|
| 5.92E-07    | 4.30737E-05 |
| 1.55275E-05 | 0.000863498 |
| 9.56E-10    | 8.52E-08    |
| 8.21E-12    | 8.25E-10    |
| 4.16774E-05 | 0.002162713 |
| 1.7557E-05  | 0.000966466 |
| 2.76E-06    | 0.00017696  |
| 2.54604E-05 | 0.001369145 |
| 1.05E-16    | 1.34E-14    |
| 7.70E-07    | 5.48705E-05 |
| 3.14E-10    | 2.88E-08    |
| 4.23E-14    | 4.82E-12    |
| 8.03E-07    | 5.69167E-05 |
| 1.70E-08    | 1.36E-06    |
| 7.96E-17    | 1.02E-14    |
| 9.23E-06    | 0.000533261 |
| 3.96682E-05 | 0.002065027 |
| 2.71806E-05 | 0.001452067 |
| 1.94E-07    | 1.47377E-05 |
| 4.76E-06    | 0.000287076 |
| 1.38E-06    | 9.42797E-05 |
| 7.41E-26    | 1.42E-23    |
| 6.77E-07    | 4.87768E-05 |
| 7.7089E-05  | 0.003738357 |
| 8.05E-06    | 0.000471789 |
| 0.000450837 | 0.017743799 |
| 2.47E-06    | 0.000161616 |
| 5.59E-23    | 9.91E-21    |
| 1.33E-21    | 2.19E-19    |
| 3.07E-23    | 5.56E-21    |
| 5.93E-21    | 9.28E-19    |
| 3.71E-15    | 4.42E-13    |
| 1.32E-19    | 1.91E-17    |
| 3.33E-26    | 6.54E-24    |
| 9.24E-08    | 7.13E-06    |
| 0.000273426 | 0.011724201 |
| 0.000276217 | 0.011782811 |
| 4.81E-14    | 5.41E-12    |
| 3.26E-06    | 0.000204803 |
| 5.40E-13    | 5.83E-11    |
| 1.71E-19    | 2.42E-17    |
| 9.38E-21    | 1.42E-18    |
| 6.31E-18    | 8.50E-16    |
| 6.24E-11    | 5.95E-09    |
| 1.08E-20    | 1.61E-18    |
| 4.94E-18    | 6.70E-16    |
| 6.54E-12    | 6.62E-10    |

|             |             |
|-------------|-------------|
| 4.02E-08    | 3.17E-06    |
| 1.36944E-05 | 0.000769436 |
| 0.00071312  | 0.026348253 |
| 1.63058E-05 | 0.000900635 |
| 7.49E-10    | 6.74E-08    |
| 3.93E-15    | 4.64E-13    |
| 3.421E-05   | 0.001798119 |
| 2.15E-17    | 2.80E-15    |
| 0.000446    | 0.017638658 |
| 1.85E-22    | 3.08E-20    |
| 0.000702309 | 0.026007763 |
| 0.00128245  | 0.043715986 |
| 1.30E-22    | 2.26E-20    |
| 7.71E-07    | 5.48705E-05 |
| 1.76E-06    | 0.000118283 |
| 4.20E-07    | 3.07999E-05 |
| 2.00E-06    | 0.000132785 |
| 1.59E-21    | 2.58E-19    |
| 6.78E-21    | 1.05E-18    |
| 7.03E-21    | 1.08E-18    |
| 1.47E-06    | 0.000100398 |
| 3.98E-09    | 3.34E-07    |
| 1.38E-17    | 1.83E-15    |
| 7.56669E-05 | 0.003680348 |
| 4.44E-21    | 7.02E-19    |
| 3.32877E-05 | 0.001757276 |
| 2.88E-21    | 4.61E-19    |
| 8.66E-13    | 9.29E-11    |
| 4.53E-06    | 0.000275305 |
| 0.000140268 | 0.00640203  |
| 0.000988707 | 0.034794803 |
| 2.42E-06    | 0.000159193 |
| 1.88E-06    | 0.000125042 |
| 1.84E-06    | 0.000122555 |
| 0.000134945 | 0.006176383 |
| 1.07E-06    | 7.4202E-05  |
| 2.21E-12    | 2.32E-10    |
| 1.84E-17    | 2.42E-15    |
| 8.18E-07    | 5.76807E-05 |
| 2.84032E-05 | 0.001512423 |
| 8.49E-14    | 9.48E-12    |
| 0.000286536 | 0.012190117 |
| 0.000415821 | 0.016729342 |
| 2.93E-07    | 2.1932E-05  |
| 1.58E-16    | 1.99E-14    |
| 8.98E-12    | 8.98E-10    |
| 3.42E-07    | 2.51969E-05 |



|             |             |
|-------------|-------------|
| 1.56E-18    | 2.15E-16    |
| 2.86571E-05 | 0.001520974 |
| 1.35E-08    | 1.10E-06    |
| 2.69E-07    | 2.01917E-05 |
| 8.95E-09    | 7.44E-07    |
| 4.41E-17    | 5.70E-15    |
| 0.00080607  | 0.029142006 |
| 3.05E-16    | 3.77E-14    |
| 1.45E-08    | 1.18E-06    |
| 1.03E-09    | 9.04E-08    |
| 7.60E-06    | 0.00044865  |
| 9.05E-07    | 6.32738E-05 |
| 4.30E-14    | 4.86E-12    |
| 1.70E-16    | 2.13E-14    |
| 7.54872E-05 | 0.003680348 |
| 3.72E-12    | 3.86E-10    |
| 1.85E-14    | 2.12E-12    |
| 0.001027967 | 0.03578994  |
| 3.51063E-05 | 0.001839299 |
| 2.20E-15    | 2.64E-13    |
| 6.0629E-05  | 0.003002704 |
| 3.04E-10    | 2.80E-08    |
| 1.56E-06    | 0.00010515  |
| 8.78E-13    | 9.35E-11    |
| 0.000469345 | 0.018295459 |
| 1.25E-14    | 1.44E-12    |
| 0.000111832 | 0.005251271 |
| 0.000175318 | 0.007782978 |
| 3.46E-06    | 0.000215871 |
| 1.28747E-05 | 0.000729893 |
| 1.00167E-05 | 0.00057672  |
| 0.000373858 | 0.015305619 |
| 2.29707E-05 | 0.001247614 |
| 8.65E-11    | 8.19E-09    |
| 1.2901E-05  | 0.000729893 |
| 2.16E-08    | 1.73E-06    |
| 0.000628633 | 0.023492979 |
| 4.48E-09    | 3.74E-07    |
| 1.12E-09    | 9.72E-08    |
| 8.69E-14    | 9.63E-12    |
| 1.48E-09    | 1.27E-07    |
| 0.00039937  | 0.016227765 |
| 1.30E-08    | 1.07E-06    |
| 9.68E-10    | 8.57E-08    |
| 0.000816886 | 0.029447639 |
| 0.000235463 | 0.010149811 |
| 2.65E-09    | 2.24E-07    |

|             |             |
|-------------|-------------|
| 0.000291247 | 0.012358279 |
| 3.37E-11    | 3.25E-09    |
| 0.00031753  | 0.013266245 |
| 1.54E-12    | 1.62E-10    |
| 1.62587E-05 | 0.000900635 |
| 2.90E-10    | 2.68E-08    |
| 4.18E-08    | 3.27E-06    |
| 4.14E-06    | 0.000255714 |
| 0.001435162 | 0.048017831 |
| 5.32919E-05 | 0.002693094 |
| 0.000233456 | 0.010090012 |
| 0.001489866 | 0.049460155 |
| 5.24E-12    | 5.37E-10    |
| 2.07E-11    | 2.02E-09    |
| 9.43418E-05 | 0.004507932 |
| 5.86047E-05 | 0.002911296 |
| 0.001060226 | 0.036755993 |
| 4.64E-10    | 4.22E-08    |
| 6.24152E-05 | 0.003081796 |
| 0.000440012 | 0.017486736 |
| 0.000585041 | 0.022066321 |
| 4.7229E-05  | 0.002425284 |
| 0.000995831 | 0.034935782 |
| 1.80E-10    | 1.69E-08    |
| 0.000415224 | 0.016729342 |
| 1.06E-09    | 9.32E-08    |
| 0.000174641 | 0.007774857 |
| 5.67871E-05 | 0.002837567 |
| 0.000472572 | 0.018370184 |
| 0.001131205 | 0.038885769 |
| 0.000361188 | 0.014861607 |
| 1.62E-08    | 1.30E-06    |
| 1.46256E-05 | 0.000818935 |
| 1.89E-09    | 1.61E-07    |
| 4.75E-06    | 0.000287076 |
| 6.43E-06    | 0.000381267 |
| 0.000107578 | 0.005066131 |
| 2.99E-06    | 0.000189721 |
| 0.0001571   | 0.007071226 |
| 0.00089363  | 0.031792163 |
| 2.98E-07    | 2.21977E-05 |
| 0.000330146 | 0.013688046 |
| 9.85E-07    | 6.85798E-05 |
| 5.42089E-05 | 0.002726173 |
| 0.000311365 | 0.013042119 |
| 1.91677E-05 | 0.001051575 |
| 4.45E-06    | 0.000271804 |

|             |             |
|-------------|-------------|
| 1.27E-07    | 9.66E-06    |
| 7.73312E-05 | 0.003738976 |
| 0.00042236  | 0.016950578 |
| 3.75E-06    | 0.000233158 |
| 4.18561E-05 | 0.002165091 |
| 0.000219294 | 0.00950314  |
| 0.000165444 | 0.007397943 |
| 0.000387915 | 0.01580172  |
| 0.000455816 | 0.017896539 |
| 0.000502881 | 0.019463066 |
| 0.00014439  | 0.006553472 |
| 0.00014439  | 0.006553472 |
| 0.000538475 | 0.020547796 |
| 0.000445294 | 0.017638658 |
| 0.00064139  | 0.023860296 |
| 1.14E-06    | 7.84268E-05 |
| 0.000106917 | 0.005049604 |
| 0.000840762 | 0.030108503 |
| 0.000428552 | 0.017114777 |
| 8.89E-07    | 6.24626E-05 |
| 0.00012006  | 0.005573385 |
| 1.03621E-05 | 0.000594508 |
| 0.001179789 | 0.040372938 |
| 4.79405E-05 | 0.002446803 |
| 2.53226E-05 | 0.001366247 |
| 0.000124121 | 0.005745542 |
| 5.51673E-05 | 0.002765834 |
| 4.94E-06    | 0.000295941 |
| 0.000721741 | 0.026546399 |
| 0.000737529 | 0.027065998 |
| 2.56E-06    | 0.000166056 |
| 0.000164365 | 0.00737786  |
| 0.000466434 | 0.018225591 |
| 0.000411198 | 0.016625449 |
| 2.07E-07    | 1.56451E-05 |
| 7.13E-07    | 5.11796E-05 |
| 8.42E-06    | 0.000489995 |
| 0.000513273 | 0.019818195 |
| 4.68E-07    | 3.41967E-05 |
| 8.40E-06    | 0.000489995 |
| 0.000347362 | 0.014365276 |
| 0.000745501 | 0.027235846 |
| 3.17E-06    | 0.000200136 |
| 0.00016572  | 0.007397943 |
| 0.001318282 | 0.044564492 |
| 0.000261203 | 0.011229677 |
| 0.000758813 | 0.027660167 |

|             |             |
|-------------|-------------|
| 3.88515E-05 | 0.002028996 |
| 0.000521446 | 0.020038772 |
| 3.91E-06    | 0.000242436 |
| 4.92E-06    | 0.000295846 |
| 2.79E-06    | 0.000178283 |
| 7.74E-06    | 0.000455144 |
| 0.000373049 | 0.015305619 |
| 7.86481E-05 | 0.003791396 |
| 0.0013064   | 0.044346849 |
| 0.00010043  | 0.004756989 |
| 0.000203286 | 0.00890413  |
| 0.001459213 | 0.048722158 |
| 9.89322E-05 | 0.004699711 |
| 0.000126403 | 0.005834599 |
| 0.000305912 | 0.012913301 |
| 0.000700914 | 0.026007763 |
| 0.000383259 | 0.015651194 |
| 0.00021036  | 0.009164723 |
| 0.000424621 | 0.016999426 |
| 0.000179493 | 0.007904498 |
| 0.000951892 | 0.033717682 |
| 0.000743353 | 0.02721841  |
| 5.13276E-05 | 0.002605393 |
| 0.000988584 | 0.034794803 |
| 0.000963975 | 0.034071587 |
| 0.001490422 | 0.049460155 |
| 0.000153636 | 0.00695375  |
| 0.000176606 | 0.007798428 |
| 0.000133711 | 0.006137136 |
| 0.00043904  | 0.017486736 |
| 0.000631102 | 0.023531286 |
| 0.000318441 | 0.013270267 |
| 0.00053257  | 0.020370189 |
| 0.000132487 | 0.006098134 |
| 0.001509073 | 0.049875931 |
| 0.000276239 | 0.011782811 |
| 0.000304551 | 0.012889238 |
| 0.00035958  | 0.014832885 |
| 0.00130511  | 0.044346849 |
| 0.000806619 | 0.029142006 |
| 0.000571338 | 0.021599489 |
| 0.001017063 | 0.035486135 |
| 0.000449177 | 0.017721286 |
| 0.000822865 | 0.029597727 |
| 0.001433529 | 0.048017831 |
| 0.000892445 | 0.031792163 |
| 0.001321654 | 0.044585993 |

|             |             |
|-------------|-------------|
| 0.00149586  | 0.049539737 |
| 0.001181901 | 0.040372938 |
| 0.001310105 | 0.044380151 |
| 0.001106084 | 0.038252266 |
| 0.000908046 | 0.032234634 |
| 0.000877915 | 0.031370061 |
| 0.001109208 | 0.038252266 |
| 0.000802933 | 0.029138073 |
| 0.001181091 | 0.040372938 |
| 0.001110428 | 0.038252266 |
| 0.000557754 | 0.021135001 |
| 0.000311359 | 0.013042119 |
| 0.000526309 | 0.020178052 |
| 0.000329913 | 0.013688046 |
| 0.000997001 | 0.034935782 |
| 0.001435171 | 0.048017831 |
| 0.00054131  | 0.020607706 |
| 2.51212E-05 | 0.001359881 |
| 7.39597E-05 | 0.003618916 |
| 0.000175779 | 0.007782978 |
| 9.06362E-05 | 0.004356421 |
| 9.27473E-05 | 0.004444776 |
| 5.33859E-05 | 0.002693094 |
| 2.17601E-05 | 0.001185817 |
| 5.89E-06    | 0.000350446 |
| 0.001038301 | 0.036072641 |
| 9.46482E-05 | 0.004509352 |
| 0.000113805 | 0.005313308 |
| 0.000716282 | 0.026405205 |
| 2.51E-06    | 0.000163855 |
| 0.001006555 | 0.035194848 |
| 0.000598876 | 0.022484068 |
| 8.76E-06    | 0.000507788 |
| 3.29E-06    | 0.000206465 |
| 0.000600344 | 0.022487383 |
| 7.12122E-05 | 0.003494974 |
| 0.000402038 | 0.016295555 |
| 4.54272E-05 | 0.002342373 |
| 3.3325E-05  | 0.001757276 |
| 0.00021499  | 0.009341446 |
| 4.80531E-05 | 0.002446803 |
| 0.000156374 | 0.007058077 |
| 1.36435E-05 | 0.000769226 |
| 0.001326524 | 0.044657817 |
| 2.88E-06    | 0.000183466 |
| 0.000114947 | 0.005351263 |
| 5.69464E-05 | 0.002837567 |

|             |             |
|-------------|-------------|
| 2.57E-06    | 0.000166056 |
| 0.000827032 | 0.029682086 |
| 4.31E-06    | 0.0002639   |
| 0.00055002  | 0.02089052  |
| 0.000515301 | 0.019849427 |
| 2.62E-06    | 0.000169037 |
| 0.000181214 | 0.007958756 |
| 9.47E-10    | 8.48E-08    |
| 0.000800725 | 0.029122805 |
| 0.000309313 | 0.013023125 |
| 2.01E-15    | 2.43E-13    |
| 4.31E-06    | 0.0002639   |
| 4.03E-12    | 4.16E-10    |
| 2.01266E-05 | 0.00110048  |
| 5.52E-06    | 0.000329217 |
| 9.20E-08    | 7.13E-06    |
| 0.000457381 | 0.017914838 |
| 0.001466041 | 0.048850045 |
| 1.17109E-05 | 0.000669536 |
| 0.00011368  | 0.005313308 |
| 4.73328E-05 | 0.002425284 |
| 1.08E-11    | 1.07E-09    |
| 0.000473516 | 0.018370184 |
| 0.000596899 | 0.022461586 |
| 0.000204288 | 0.008924041 |
| 1.22053E-05 | 0.000695361 |
