# Supplementary material
Source: PubMed Central journal article supplement (PMC6440870)
Supplement: NIHMS1509874-supplement-9.pdf [file NIHMS1509874-supplement-9.pdf]

**Supplementary Table 5.** Differentially expressed genes identified by NanoString (2F8 model), significantly differentially expressed

| Gene symbol    | mean_IgG    | mean_PDL1   | mean_Cis    | mean_CisP   | p_value_limma | q_value_limma |
|----------------|-------------|-------------|-------------|-------------|---------------|---------------|
| <b>Msln</b>    | 7.727725168 | 5.152901202 | 7.158239157 | 8.224625692 | 5.0578E-05    | 0.0232        |
| <b>Tpsab1</b>  | 5.26291376  | 9.106569969 | 6.372764078 | 4.22104263  | 6.18653E-05   | 0.0232        |
| <b>Fpr2</b>    | 5.589866751 | 9.849850334 | 7.454197823 | 7.081802126 | 0.000152284   | 0.0381        |
| <b>Il1b</b>    | 5.097043221 | 9.06724461  | 7.21166925  | 5.251641788 | 0.0002102     | 0.0394        |
| <b>Cd207</b>   | 4.98137702  | 7.165268371 | 7.154542048 | 5.641202511 | 0.000337568   | 0.0401        |
| <b>Gbp2b</b>   | 4.184945152 | 9.237186319 | 7.318723033 | 5.203820804 | 0.000452638   | 0.0401        |
| <b>Il7r</b>    | 5.706396248 | 8.543381998 | 7.184415129 | 6.280416655 | 0.000567547   | 0.0401        |
| <b>Ltb</b>     | 4.804127263 | 7.599853042 | 6.823322557 | 5.544059117 | 0.000705302   | 0.0401        |
| <b>Cd79b</b>   | 4.728274944 | 7.545028128 | 5.749926705 | 5.073390364 | 0.000727765   | 0.0401        |
| <b>Card9</b>   | 4.049803057 | 6.618879247 | 5.865629522 | 4.692155931 | 0.000779904   | 0.0401        |
| <b>Cr2</b>     | 3.894828984 | 6.7204319   | 5.368854313 | 4.118394731 | 0.000784102   | 0.0401        |
| <b>Sell</b>    | 5.882944711 | 8.378864964 | 7.479475802 | 6.426756932 | 0.000802681   | 0.0401        |
| <b>Tnfsf10</b> | 4.968264887 | 7.519513553 | 7.086951935 | 5.64149864  | 0.000816926   | 0.0401        |
| <b>Cd4</b>     | 5.028516912 | 7.487423336 | 6.105709975 | 5.319503449 | 0.000899819   | 0.0401        |
| <b>Sh2d1b1</b> | 5.58319053  | 7.773843542 | 6.925867358 | 5.237308494 | 0.000913138   | 0.0401        |
| <b>Cma1</b>    | 5.955190723 | 8.898702527 | 7.67740778  | 5.54613077  | 0.000957226   | 0.0401        |
| <b>H2-Ob</b>   | 6.207908381 | 8.26650848  | 7.509227723 | 6.092625693 | 0.001042614   | 0.0401        |
| <b>Ncr1</b>    | 5.141953285 | 7.897973004 | 6.462125387 | 5.265771076 | 0.001075153   | 0.0401        |
| <b>Hck</b>     | 5.817854643 | 8.454912926 | 7.31167443  | 6.887845865 | 0.001076175   | 0.0401        |
| <b>Icos</b>    | 5.021272145 | 8.130520881 | 7.157241607 | 5.894973987 | 0.001090928   | 0.0401        |
| <b>Mefv</b>    | 5.335548515 | 7.405685666 | 6.263627664 | 5.066888704 | 0.001122959   | 0.0401        |
| <b>Irak2</b>   | 6.343714617 | 8.268515217 | 7.554989345 | 6.310155622 | 0.001428314   | 0.0430        |
| <b>Pycard</b>  | 4.928963693 | 7.35956135  | 6.123199115 | 5.575072358 | 0.001432414   | 0.0430        |
| <b>Btla</b>    | 5.002920107 | 7.215504503 | 6.454859757 | 5.255992043 | 0.001471103   | 0.0430        |
| <b>Havcr2</b>  | 5.014910051 | 7.835247181 | 7.003883013 | 5.228718171 | 0.001487685   | 0.0430        |
| <b>Ly9</b>     | 6.022604135 | 7.986068835 | 7.024602936 | 6.566348678 | 0.001532829   | 0.0430        |
| <b>Ms4a1</b>   | 5.497028487 | 7.501534262 | 6.68516123  | 4.919044369 | 0.001568769   | 0.0430        |
| <b>Cd40</b>    | 5.215998159 | 7.434720175 | 7.041056162 | 5.190985843 | 0.00160694    | 0.0430        |
| <b>Snai1</b>   | 4.874760008 | 6.691575912 | 6.185913468 | 4.319121985 | 0.001730938   | 0.0443        |
| <b>Ebi3</b>    | 4.676839783 | 7.275499231 | 5.946269995 | 5.678088087 | 0.001854627   | 0.0443        |

|                 |             |             |             |             |             |        |
|-----------------|-------------|-------------|-------------|-------------|-------------|--------|
| <b>Oasl1</b>    | 4.394430963 | 6.705331232 | 6.100236681 | 4.322288588 | 0.001985911 | 0.0443 |
| <b>Cmah</b>     | 5.269412562 | 7.379836116 | 6.626174652 | 5.888290249 | 0.001996175 | 0.0443 |
| <b>Tnfsf13b</b> | 3.872963274 | 6.782442596 | 5.760015254 | 4.50814059  | 0.002026388 | 0.0443 |
| <b>Tnfrsf14</b> | 5.40723552  | 7.946467122 | 6.712920171 | 6.08285171  | 0.002036464 | 0.0443 |
| <b>Il7</b>      | 4.960796249 | 6.75701869  | 6.202212181 | 4.953792655 | 0.002072689 | 0.0443 |
| <b>Il16</b>     | 5.880210622 | 7.836884308 | 6.82493833  | 6.389828517 | 0.002204631 | 0.0443 |
| <b>F13a1</b>    | 12.71289785 | 10.09748378 | 11.07110569 | 13.12743413 | 0.002244852 | 0.0443 |
| <b>Il21r</b>    | 5.735953854 | 8.171409334 | 6.561546352 | 6.004370111 | 0.00236077  | 0.0443 |
| <b>Cd274</b>    | 5.586087524 | 8.849533027 | 6.939658433 | 6.638129034 | 0.002363896 | 0.0443 |
| <b>Irf4</b>     | 4.986045037 | 7.142642857 | 6.4553041   | 5.272476399 | 0.002417792 | 0.0443 |
| <b>Ifi44l</b>   | 6.077851438 | 8.854331968 | 6.398109612 | 6.817604249 | 0.002424037 | 0.0443 |
| <b>Icam2</b>    | 5.313504562 | 7.428204265 | 6.287376266 | 5.248173744 | 0.00250798  | 0.0446 |
| <b>Tnf</b>      | 4.581185778 | 7.247732889 | 6.330433465 | 5.135992063 | 0.002556503 | 0.0446 |
| <b>Nlrp3</b>    | 6.003777441 | 8.204452542 | 7.117549702 | 6.819080946 | 0.00261824  | 0.0446 |
| <b>Pparg</b>    | 5.590592985 | 7.504188262 | 6.519074783 | 5.055510039 | 0.002702483 | 0.0450 |
| <b>Cd22</b>     | 5.255351415 | 7.586066784 | 6.093686891 | 6.021667532 | 0.002903771 | 0.0460 |
| <b>Gzmb</b>     | 4.094387367 | 6.826471931 | 5.924624416 | 4.136557826 | 0.00305253  | 0.0460 |
| <b>Tirap</b>    | 4.990543258 | 7.112887435 | 5.970077605 | 5.186055716 | 0.00318853  | 0.0460 |
| <b>Usp18</b>    | 5.373641639 | 7.908889624 | 6.847989418 | 5.690829031 | 0.003225971 | 0.0460 |
| <b>Xcr1</b>     | 5.351995341 | 7.663843343 | 7.063378578 | 5.213129329 | 0.003270042 | 0.0460 |
| <b>Tnfaip3</b>  | 6.217669631 | 7.754516041 | 7.085402128 | 6.045246196 | 0.00329875  | 0.0460 |
| <b>Cxcl10</b>   | 6.116392847 | 9.564056768 | 7.505679283 | 6.916438726 | 0.003449374 | 0.0460 |
| <b>Oas2</b>     | 6.141766144 | 8.81205919  | 7.709182009 | 7.027833838 | 0.003460698 | 0.0460 |
| <b>Traf3</b>    | 6.60909252  | 8.107848969 | 7.531312719 | 6.652730412 | 0.003473455 | 0.0460 |
| <b>Slc11a1</b>  | 5.629132407 | 8.378848516 | 7.421895907 | 6.965693529 | 0.003502241 | 0.0460 |
| <b>Zbp1</b>     | 6.337252209 | 9.806631026 | 8.213236297 | 8.272040958 | 0.003563443 | 0.0460 |
| <b>Socs3</b>    | 5.551659702 | 7.251038654 | 6.841666916 | 6.065021527 | 0.003672943 | 0.0460 |
| <b>Cd3eap</b>   | 5.02831854  | 7.029939204 | 6.113891725 | 5.135992063 | 0.003708657 | 0.0460 |
| <b>Spn</b>      | 5.559400454 | 7.993700484 | 6.071939118 | 6.060155622 | 0.003767208 | 0.0460 |
| <b>Prg2</b>     | 5.294931724 | 8.819457037 | 7.178517049 | 6.269115833 | 0.003807383 | 0.0460 |
| <b>Selplg</b>   | 6.941118822 | 8.822833927 | 8.032083908 | 7.961219154 | 0.003831225 | 0.0460 |
| <b>Rrad</b>     | 5.862714712 | 7.583733384 | 7.355515055 | 5.690306845 | 0.003835399 | 0.0460 |
| <b>Ikzf1</b>    | 5.926178553 | 8.297203034 | 7.265353932 | 6.975672716 | 0.003860054 | 0.0460 |
| <b>Ccr12</b>    | 5.304890218 | 7.06954645  | 6.090888744 | 4.884602182 | 0.004057612 | 0.0476 |

|                 |             |             |             |             |             |        |
|-----------------|-------------|-------------|-------------|-------------|-------------|--------|
| <b>Il12b</b>    | 4.257752977 | 7.366550255 | 6.541629416 | 5.216621271 | 0.004159946 | 0.0476 |
| <b>Xaf1</b>     | 7.282411017 | 9.799597264 | 8.702921445 | 8.654409124 | 0.004188885 | 0.0476 |
| <b>Pdcd1lg2</b> | 5.47575274  | 7.599785178 | 7.040393119 | 4.984863239 | 0.004344893 | 0.0486 |
| <b>Ctsg</b>     | 4.105055855 | 6.137247033 | 5.673891348 | 3.786801231 | 0.004441432 | 0.0488 |
| <b>Rag1</b>     | 4.431459715 | 5.930738562 | 5.825898344 | 3.574802005 | 0.004506352 | 0.0488 |
| <b>Tfeb</b>     | 4.505627174 | 7.038686641 | 5.92104701  | 4.859369955 | 0.004554717 | 0.0488 |
| <b>Card11</b>   | 4.732840202 | 7.14147099  | 5.968229179 | 4.228479466 | 0.005156499 | 0.0542 |
| <b>Ccnd3</b>    | 6.293771333 | 8.367012546 | 7.573453933 | 6.327536729 | 0.005252808 | 0.0542 |
| <b>Klrc2</b>    | 5.536058288 | 8.191417487 | 7.272980848 | 5.67349423  | 0.005284145 | 0.0542 |
| <b>Il25</b>     | 5.050553679 | 7.681405478 | 6.101860284 | 4.293419284 | 0.005411182 | 0.0542 |
| <b>Bcl2</b>     | 5.827068924 | 7.551883614 | 7.054952612 | 6.045528259 | 0.005415667 | 0.0542 |
| <b>Adora2a</b>  | 4.678854777 | 6.715634221 | 6.094637095 | 4.567400389 | 0.005593633 | 0.0547 |
| <b>Tmem173</b>  | 4.936641701 | 7.313579953 | 6.322233256 | 6.395373738 | 0.00561707  | 0.0547 |
| <b>Il4</b>      | 3.698299215 | 6.703793339 | 5.697874628 | 3.934153333 | 0.006104618 | 0.0575 |
| <b>Stat4</b>    | 4.921060453 | 7.892238344 | 6.578470195 | 6.007763413 | 0.006208712 | 0.0575 |
| <b>Isg15</b>    | 6.093874683 | 9.040225906 | 7.971111492 | 7.244589451 | 0.006221002 | 0.0575 |
| <b>Mpped1</b>   | 3.830129631 | 6.234333037 | 5.708820833 | 2.532320754 | 0.006277572 | 0.0575 |
| <b>Tap1</b>     | 6.39931867  | 8.761954319 | 7.641882385 | 7.438283818 | 0.006509034 | 0.0575 |
| <b>Rorc</b>     | 3.710587586 | 6.686748047 | 5.811629602 | 4.011290599 | 0.006513411 | 0.0575 |
| <b>Il11</b>     | 4.47868971  | 6.274498701 | 6.047051396 | 3.808142706 | 0.006611605 | 0.0575 |
| <b>Il6</b>      | 5.574818777 | 7.152052254 | 6.46078813  | 5.405198143 | 0.006709621 | 0.0575 |
| <b>Cmpk2</b>    | 6.142705857 | 7.975014451 | 7.644779229 | 6.086379906 | 0.006711711 | 0.0575 |
| <b>Csf2rb</b>   | 7.081503147 | 9.00960524  | 8.015771664 | 7.850130629 | 0.006737399 | 0.0575 |
| <b>Mx2</b>      | 5.191800413 | 7.412575778 | 6.105709975 | 4.757461994 | 0.006744787 | 0.0575 |
| <b>Ifi44</b>    | 7.231503945 | 10.4686698  | 8.225649409 | 8.974314031 | 0.00722403  | 0.0596 |
| <b>Trp53</b>    | 6.83058176  | 8.238141284 | 8.226600113 | 7.080881318 | 0.007286277 | 0.0596 |
| <b>Sigirr</b>   | 4.752319109 | 7.040091842 | 6.696348125 | 4.922523371 | 0.007307894 | 0.0596 |
| <b>Slamf7</b>   | 4.068303202 | 7.659589595 | 5.875212502 | 5.94196155  | 0.007346118 | 0.0596 |
| <b>Cxcr6</b>    | 5.833992591 | 8.362043491 | 6.949343309 | 7.169177389 | 0.007495057 | 0.0596 |
| <b>H2-Dma</b>   | 5.542774648 | 8.02780256  | 6.964533092 | 5.726233612 | 0.007561669 | 0.0596 |
| <b>Cd7</b>      | 5.240242818 | 7.367516159 | 6.524179135 | 5.179265133 | 0.007580459 | 0.0596 |
| <b>Cd96</b>     | 4.946623247 | 7.073045652 | 6.28996902  | 4.75734877  | 0.007626993 | 0.0596 |
| <b>Bst2</b>     | 8.049879364 | 9.999445221 | 9.910981236 | 9.113376656 | 0.0078104   | 0.0604 |
| <b>Ccr3</b>     | 4.467265907 | 7.211467775 | 5.854550206 | 4.29106961  | 0.008301323 | 0.0626 |

|                  |             |             |             |             |             |        |
|------------------|-------------|-------------|-------------|-------------|-------------|--------|
| <b>Stat1</b>     | 7.603793233 | 10.6248178  | 9.04462162  | 8.880681104 | 0.008423198 | 0.0626 |
| <b>Cxcr5</b>     | 4.218294934 | 6.474024146 | 5.400427199 | 3.58223884  | 0.008494982 | 0.0626 |
| <b>Cxcr4</b>     | 6.542721602 | 8.135583731 | 7.331031982 | 6.98214116  | 0.008518181 | 0.0626 |
| <b>Tlr9</b>      | 6.37372131  | 8.778780655 | 7.669249319 | 7.567093206 | 0.008601917 | 0.0626 |
| <b>Cxcl1</b>     | 3.878555227 | 5.628138825 | 6.076260373 | 4.594154299 | 0.00860297  | 0.0626 |
| <b>Il2rg</b>     | 4.189015273 | 6.308723174 | 5.427611683 | 4.353671309 | 0.008984775 | 0.0642 |
| <b>Psemb9</b>    | 7.28664038  | 9.964065665 | 9.072006839 | 8.430946616 | 0.0090235   | 0.0642 |
| <b>Zap70</b>     | 3.679204865 | 6.606267331 | 5.610485234 | 4.495258015 | 0.009077228 | 0.0642 |
| <b>Fadd</b>      | 4.853406982 | 6.706210243 | 6.037354246 | 4.518992505 | 0.009152705 | 0.0642 |
| <b>Tnfrsf13c</b> | 2.922062577 | 5.52437945  | 4.935784974 | 3.739751438 | 0.009412395 | 0.0651 |
| <b>Xcl1</b>      | 4.985193099 | 7.784511154 | 6.958038951 | 6.3559019   | 0.009463205 | 0.0651 |
| <b>Cd19</b>      | 4.329935668 | 6.73739043  | 5.259085105 | 4.145123532 | 0.009642918 | 0.0657 |
| <b>Ido1</b>      | 4.938095162 | 6.49338318  | 5.900313623 | 4.0770492   | 0.009882249 | 0.0667 |
| <b>Nfatc2</b>    | 4.325813638 | 6.408914739 | 5.688836564 | 4.941907105 | 0.010057707 | 0.0667 |
| <b>Ddx60</b>     | 6.636647471 | 8.953927657 | 7.790502711 | 7.302531436 | 0.010124044 | 0.0667 |
| <b>Cd2</b>       | 4.573080408 | 6.730476211 | 6.096153528 | 4.207430684 | 0.010241718 | 0.0667 |
| <b>Cdh5</b>      | 6.321689069 | 7.766969242 | 7.292979746 | 6.430009804 | 0.010256184 | 0.0667 |
| <b>Pax5</b>      | 5.257914533 | 6.599396897 | 6.087464371 | 4.650493464 | 0.010310222 | 0.0667 |
| <b>Fcer1a</b>    | 6.050024695 | 7.351723776 | 7.194608531 | 5.024795853 | 0.010469065 | 0.0671 |
| <b>Cd8b1</b>     | 4.731411789 | 7.128066487 | 6.378933638 | 5.233504767 | 0.010835686 | 0.0689 |
| <b>Cd8a</b>      | 4.98137702  | 7.362029955 | 6.122701898 | 6.124250158 | 0.01111488  | 0.0692 |
| <b>Irf7</b>      | 5.548148457 | 7.883845114 | 7.038575021 | 5.712885224 | 0.011134457 | 0.0692 |
| <b>Il1rn</b>     | 4.918251338 | 7.621393622 | 6.647838327 | 6.375556447 | 0.01119557  | 0.0692 |
| <b>Gata3</b>     | 4.400750815 | 6.731585786 | 5.488224457 | 4.239751438 | 0.011371272 | 0.0692 |
| <b>Ccl21a</b>    | 6.855850736 | 8.829154402 | 8.036408778 | 6.077171691 | 0.011379728 | 0.0692 |
| <b>Klra15</b>    | 3.946809851 | 5.600538072 | 4.807354922 | 3.528781238 | 0.011446922 | 0.0692 |
| <b>Tnfrsf13b</b> | 4.747506596 | 6.643176444 | 6.125951482 | 5.031968362 | 0.011706251 | 0.0702 |
| <b>Nod1</b>      | 6.272635431 | 7.829614623 | 7.464819503 | 5.932415143 | 0.012460726 | 0.0742 |
| <b>C1ra</b>      | 6.77754755  | 8.40921116  | 7.675317821 | 6.842264533 | 0.01261327  | 0.0743 |
| <b>Mapk11</b>    | 4.337536246 | 6.261220586 | 5.883235088 | 4.354609343 | 0.012685415 | 0.0743 |
| <b>Epsti1</b>    | 3.04248125  | 4.768361501 | 5.121970766 | 2.773189285 | 0.013143971 | 0.0762 |
| <b>Ctsw</b>      | 6.019751382 | 8.389900385 | 6.849379019 | 6.657571476 | 0.013298484 | 0.0762 |
| <b>Cd3g</b>      | 5.293393667 | 7.696128146 | 7.192606267 | 6.587193653 | 0.01334149  | 0.0762 |
| <b>Cxcl9</b>     | 7.819265143 | 12.43863734 | 8.500496675 | 9.923866581 | 0.013402446 | 0.0762 |

|                 |             |             |             |             |             |        |
|-----------------|-------------|-------------|-------------|-------------|-------------|--------|
| <b>Ccl24</b>    | 4.602542439 | 6.637946893 | 5.59164715  | 4.655284028 | 0.013601464 | 0.0766 |
| <b>Cd5</b>      | 3.925813683 | 6.770156164 | 5.599152962 | 4.655284028 | 0.013688571 | 0.0766 |
| <b>Cd69</b>     | 5.884950864 | 8.31508954  | 6.570822182 | 6.019309061 | 0.01380729  | 0.0767 |
| <b>Irak3</b>    | 6.714720962 | 8.156691536 | 7.303580023 | 6.469738609 | 0.013983049 | 0.0771 |
| <b>Ikzf2</b>    | 6.739553211 | 8.040899975 | 7.793447562 | 6.843916365 | 0.014134281 | 0.0774 |
| <b>Ccl22</b>    | 5.161430438 | 7.082433185 | 6.326776425 | 4.811016616 | 0.014400304 | 0.0776 |
| <b>Saa1</b>     | 4.784287815 | 7.514829761 | 6.302343826 | 4.349836172 | 0.014472015 | 0.0776 |
| <b>Csf3r</b>    | 6.04828989  | 8.134223419 | 6.821208715 | 6.433385178 | 0.014486332 | 0.0776 |
| <b>H2-DMb2</b>  | 4.834178938 | 7.120262588 | 6.267162447 | 5.516517041 | 0.014842668 | 0.0782 |
| <b>Gzmm</b>     | 3.525821952 | 6.169501509 | 5.300791705 | 3.367283255 | 0.014941516 | 0.0782 |
| <b>Ifna1</b>    | 6.015663457 | 8.945216692 | 7.559239881 | 5.448705493 | 0.015014017 | 0.0782 |
| <b>Cd80</b>     | 6.073032375 | 7.887941859 | 6.912419082 | 6.585473517 | 0.015043803 | 0.0782 |
| <b>H2-K1</b>    | 8.540730431 | 10.65849425 | 10.12413117 | 9.922132293 | 0.015163851 | 0.0782 |
| <b>C6</b>       | 5.782515681 | 7.67830218  | 7.126823173 | 5.652549853 | 0.01524587  | 0.0782 |
| <b>Il17f</b>    | 3.986040746 | 6.926815122 | 5.938244218 | 3.611899965 | 0.015382319 | 0.0782 |
| <b>Cd79a</b>    | 4.008398767 | 6.003672758 | 5.123108234 | 3.268577185 | 0.015431824 | 0.0782 |
| <b>Cd180</b>    | 7.540247059 | 10.06521884 | 8.542224966 | 9.013390799 | 0.015901301 | 0.0796 |
| <b>Cx3cr1</b>   | 7.864977905 | 9.662493077 | 8.451158392 | 10.10810213 | 0.015916887 | 0.0796 |
| <b>Foxj1</b>    | 4.466179539 | 6.330220515 | 5.966755134 | 3.558666942 | 0.016188451 | 0.0801 |
| <b>Fos</b>      | 7.254793328 | 8.490585219 | 8.19583459  | 7.064424855 | 0.016241806 | 0.0801 |
| <b>Pou2af1</b>  | 4.482776708 | 6.861043682 | 6.070299867 | 4.516588004 | 0.016413715 | 0.0805 |
| <b>Runx3</b>    | 4.561981878 | 6.759202968 | 5.728911096 | 4.513672275 | 0.016822462 | 0.0819 |
| <b>Icosl</b>    | 6.10267779  | 8.409731565 | 7.094925179 | 7.129461552 | 0.017402188 | 0.0836 |
| <b>Serpinb2</b> | 6.050053438 | 7.644485924 | 7.031158962 | 6.454172462 | 0.017587451 | 0.0836 |
| <b>Tlr6</b>     | 6.605602375 | 8.297908572 | 6.669478487 | 7.217096165 | 0.01765436  | 0.0836 |
| <b>Pou2f2</b>   | 5.626772507 | 8.34287447  | 6.177380939 | 6.677054354 | 0.017849321 | 0.0836 |
| <b>Icam1</b>    | 5.941873161 | 7.350674673 | 6.85599464  | 5.789699567 | 0.018033806 | 0.0836 |
| <b>Mmp9</b>     | 4.987795562 | 6.747251867 | 5.500591666 | 4.76499585  | 0.018046016 | 0.0836 |
| <b>Irgm2</b>    | 6.660850934 | 8.971796737 | 7.83354881  | 7.054634897 | 0.01806867  | 0.0836 |
| <b>Notch1</b>   | 6.421607673 | 8.095839676 | 7.327488615 | 6.490047027 | 0.01816794  | 0.0836 |
| <b>Klra2</b>    | 7.4950709   | 10.35177498 | 8.915149107 | 9.000492287 | 0.018197074 | 0.0836 |
| <b>Vwf</b>      | 5.498235967 | 7.231274664 | 6.722010216 | 6.143683602 | 0.018342871 | 0.0836 |
| <b>Ifitm1</b>   | 6.342856095 | 8.211818039 | 7.211053994 | 6.392263702 | 0.018531821 | 0.0836 |
| <b>Mnx1</b>     | 3.928561379 | 6.049960277 | 4.85324519  | 3.549918086 | 0.018586372 | 0.0836 |

|                 |             |             |             |             |             |        |
|-----------------|-------------|-------------|-------------|-------------|-------------|--------|
| <b>Ccl19</b>    | 5.581029201 | 8.208643833 | 6.963772652 | 5.05237762  | 0.018635729 | 0.0836 |
| <b>Erbp2</b>    | 5.587503391 | 7.184274944 | 7.054120608 | 5.62511821  | 0.018749964 | 0.0836 |
| <b>Il2rb</b>    | 6.896401837 | 9.205600701 | 7.733182182 | 7.511810974 | 0.018827573 | 0.0836 |
| <b>Slamf1</b>   | 4.182604266 | 6.927885658 | 5.609676322 | 4.768937679 | 0.019033705 | 0.0836 |
| <b>Ccr5</b>     | 7.718140299 | 10.00461198 | 9.053899774 | 9.439170104 | 0.019113349 | 0.0836 |
| <b>Itgb3</b>    | 4.57290285  | 6.426531142 | 6.186653191 | 4.640560606 | 0.019164216 | 0.0836 |
| <b>Hcst</b>     | 5.72137606  | 7.591533978 | 6.793957476 | 6.291766471 | 0.019512906 | 0.0844 |
| <b>Dpp4</b>     | 6.238622568 | 7.731474627 | 7.504668047 | 6.134188009 | 0.019647991 | 0.0844 |
| <b>Entpd1</b>   | 6.823342126 | 8.287167941 | 7.794818313 | 7.272006959 | 0.019699528 | 0.0844 |
| <b>C8b</b>      | 5.434903955 | 6.567362134 | 5.672979692 | 4.559990516 | 0.01979726  | 0.0844 |
| <b>Arg2</b>     | 4.645160334 | 6.26757119  | 5.672523215 | 3.766480239 | 0.019931045 | 0.0845 |
| <b>Fut7</b>     | 4.72364968  | 6.863545861 | 5.513083235 | 4.393677944 | 0.020237207 | 0.0853 |
| <b>Fcgr1</b>    | 7.558132494 | 9.57129307  | 8.087948473 | 8.851260634 | 0.020533105 | 0.0856 |
| <b>Tnfrsf17</b> | 3.755591953 | 6.227791484 | 5.521998186 | 3.780302429 | 0.020534087 | 0.0856 |
| <b>Gfi1</b>     | 6.274691978 | 7.42971406  | 6.471776384 | 5.648194549 | 0.020893313 | 0.0861 |
| <b>Csf2</b>     | 4.079070383 | 6.105693798 | 5.337206793 | 4.092399337 | 0.02089734  | 0.0861 |
| <b>Nt5e</b>     | 6.45750074  | 7.501217483 | 6.432568143 | 5.960529741 | 0.021058002 | 0.0861 |
| <b>Igll1</b>    | 3.923698289 | 6.368343389 | 5.590565263 | 3.88804719  | 0.021192423 | 0.0861 |
| <b>Tapbp</b>    | 6.213710582 | 7.374726427 | 7.623092766 | 6.609544151 | 0.021344458 | 0.0861 |
| <b>Psmb10</b>   | 5.737372174 | 7.971308793 | 7.341421948 | 6.780516307 | 0.021361709 | 0.0861 |
| <b>Ccl5</b>     | 5.456899252 | 8.169774017 | 6.491044983 | 6.402549853 | 0.02151743  | 0.0863 |
| <b>Cdh1</b>     | 5.672286648 | 6.654304309 | 7.704400498 | 5.025719473 | 0.02165709  | 0.0864 |
| <b>C2</b>       | 6.379177849 | 8.067392437 | 7.503140914 | 6.746979063 | 0.021998647 | 0.0867 |
| <b>Ccl28</b>    | 3.883332433 | 5.496372418 | 4.543801483 | 3.245926548 | 0.022139424 | 0.0867 |
| <b>Timd4</b>    | 4.954682988 | 7.034491958 | 6.276342988 | 5.034040014 | 0.022255855 | 0.0867 |
| <b>Relb</b>     | 7.187921881 | 8.604363429 | 9.001901774 | 7.018205784 | 0.022391538 | 0.0867 |
| <b>C1s1</b>     | 8.52038943  | 9.823252178 | 9.216127881 | 8.300369704 | 0.022407289 | 0.0867 |
| <b>Il5ra</b>    | 4.312796626 | 6.373995221 | 5.695703526 | 4.362802778 | 0.022426988 | 0.0867 |
| <b>Siglec1</b>  | 5.666661543 | 7.731828247 | 7.024792231 | 6.571232846 | 0.022799633 | 0.0877 |
| <b>Cxcl11</b>   | 6.142010597 | 8.486595729 | 7.636058359 | 6.394905614 | 0.023125843 | 0.0885 |
| <b>Ccr4</b>     | 4.241806565 | 6.529926531 | 5.944741376 | 4.414817811 | 0.023418417 | 0.0892 |
| <b>Batf</b>     | 5.662996128 | 7.474981889 | 6.159373934 | 6.118711668 | 0.023703156 | 0.0898 |
| <b>Cd55</b>     | 6.011821092 | 7.13415355  | 6.764938265 | 5.706402361 | 0.023945985 | 0.0902 |
| <b>Klrc1</b>    | 6.466821193 | 9.005627352 | 7.592838912 | 7.351904624 | 0.024509017 | 0.0915 |

|                |             |             |             |             |             |        |
|----------------|-------------|-------------|-------------|-------------|-------------|--------|
| <b>Masp2</b>   | 4.323080408 | 6.251934424 | 6.031922623 | 3.603671309 | 0.024518321 | 0.0915 |
| <b>Lta</b>     | 4.897478608 | 6.718939751 | 6.00218905  | 4.457430684 | 0.024728836 | 0.0918 |
| <b>Lcp1</b>    | 9.273144511 | 11.39447395 | 10.04164063 | 10.39973276 | 0.025239397 | 0.0932 |
| <b>Nfatc4</b>  | 4.907978988 | 6.653524933 | 5.956131518 | 4.987579168 | 0.025512925 | 0.0936 |
| <b>Mst1r</b>   | 4.253436983 | 6.255928247 | 5.893583657 | 4.314641508 | 0.025595244 | 0.0936 |
| <b>Tnfsf15</b> | 4.378555227 | 6.602094487 | 6.020400802 | 4.972368564 | 0.026862048 | 0.0971 |
| <b>Clec7a</b>  | 6.826249024 | 9.552204714 | 8.277922532 | 7.864895879 | 0.02693214  | 0.0971 |
| <b>Stat2</b>   | 6.429851801 | 7.941609805 | 7.599142671 | 6.743270179 | 0.027056497 | 0.0971 |
| <b>Cxcl14</b>  | 8.404113051 | 9.807784557 | 9.370916676 | 8.352164349 | 0.027095137 | 0.0971 |
| <b>Irf8</b>    | 6.7230639   | 8.329673621 | 7.699352597 | 7.562648341 | 0.027228808 | 0.0971 |
| <b>Lck</b>     | 5.17270241  | 6.982976609 | 6.422480934 | 5.456573499 | 0.027305339 | 0.0971 |
| <b>Ccr2</b>    | 8.761686568 | 11.61643254 | 9.591193138 | 9.450551098 | 0.027438166 | 0.0971 |
| <b>Elane</b>   | 5.015300602 | 6.878590448 | 5.965381054 | 4.392226539 | 0.027931155 | 0.0983 |
| <b>Ikbke</b>   | 5.702512666 | 7.299140542 | 6.713553349 | 6.002479018 | 0.028461759 | 0.0997 |
| <b>Klrg1</b>   | 4.938930538 | 6.997517711 | 6.064001261 | 4.399760276 | 0.028567059 | 0.0997 |
