# Supplementary material
Source: PubMed Central journal article supplement (PMC6440870)
Supplement: NIHMS1509874-supplement-10.pdf [file NIHMS1509874-supplement-10.pdf]

**Supplementary Table 6.** Differentially expressed genes (NanoString), significantly different between cc  
Genes with  $p < 0.05$  and  $q < 0.1$  (limma) are shown.

| Gene symbol      | mean_2F8    | mean_2F8lfc | lfc_se   | p_value_limma | q_value_limma |             |
|------------------|-------------|-------------|----------|---------------|---------------|-------------|
| <b>Il3</b>       | 6.444427956 | 2.723308    | -3.72112 | 0.410447      | 6.04E-07      | 0.000126852 |
| <b>Mx1</b>       | 5.273405971 | 1.651148    | -3.62226 | 0.398194      | 6.77E-07      | 0.000126852 |
| <b>Nefl</b>      | 7.680172989 | 4.044934    | -3.63524 | 0.364843      | 3.78E-07      | 0.000126852 |
| <b>Rag1</b>      | 5.359177886 | 2.285708    | -3.07347 | 0.276621      | 6.36E-07      | 0.000126852 |
| <b>Tapbp</b>     | 7.169364075 | 9.629996    | 2.460632 | 0.200546      | 2.58E-06      | 0.000386425 |
| <b>Myc</b>       | 7.886337828 | 10.23152    | 2.345187 | 0.20694       | 4.75E-06      | 0.00050928  |
| <b>Irak3</b>     | 7.672921717 | 4.81118     | -2.86174 | 0.351615      | 4.55E-06      | 0.00050928  |
| <b>Cdk1</b>      | 6.327709907 | 3.856926    | -2.47078 | 0.266764      | 6.24E-06      | 0.000585385 |
| <b>Il25</b>      | 5.986402305 | 3.013428    | -2.97297 | 0.43851       | 1.11E-05      | 0.000924932 |
| <b>Csf1</b>      | 8.486029991 | 11.02117    | 2.535145 | 0.342997      | 1.46E-05      | 0.000939081 |
| <b>Sele</b>      | 5.852679083 | 2.130772    | -3.72191 | 0.634519      | 1.50E-05      | 0.000939081 |
| <b>Pml</b>       | 7.256740227 | 9.37238     | 2.11564  | 0.211113      | 1.50E-05      | 0.000939081 |
| <b>Tnfrsf11b</b> | 6.142981217 | 3.630772    | -2.51221 | 0.353842      | 1.87E-05      | 0.001003995 |
| <b>Klra27</b>    | 4.960037734 | 2.270189    | -2.68985 | 0.399298      | 1.79E-05      | 0.001003995 |
| <b>Il7</b>       | 5.89047254  | 3.089375    | -2.8011  | 0.437171      | 2.02E-05      | 0.001011921 |
| <b>Ulbp1</b>     | 9.603213768 | 6.375759    | -3.22745 | 0.575122      | 3.06E-05      | 0.001433605 |
| <b>Il18rap</b>   | 8.736740312 | 6.835742    | -1.901   | 0.227643      | 5.47E-05      | 0.001731609 |
| <b>Prg2</b>      | 6.248924366 | 3.495701    | -2.75322 | 0.479555      | 4.31E-05      | 0.001731609 |
| <b>Spink5</b>    | 5.336793955 | 1.89872     | -3.43807 | 0.659769      | 4.55E-05      | 0.001731609 |
| <b>Ceacam1</b>   | 6.268001739 | 4.187979    | -2.08002 | 0.290554      | 5.15E-05      | 0.001731609 |
| <b>Il18</b>      | 8.968354436 | 6.116134    | -2.85222 | 0.515545      | 4.88E-05      | 0.001731609 |
| <b>Klra4</b>     | 10.26682931 | 7.15321     | -3.11362 | 0.582401      | 4.79E-05      | 0.001731609 |
| <b>Il9</b>       | 5.283739422 | 2.716535    | -2.5672  | 0.446739      | 5.54E-05      | 0.001731609 |
| <b>Il11</b>      | 5.416018057 | 2.894933    | -2.52109 | 0.419491      | 4.58E-05      | 0.001731609 |
| <b>Hspb2</b>     | 9.772531101 | 7.693352    | -2.07918 | 0.305716      | 6.35E-05      | 0.001905209 |
| <b>Mpo</b>       | 7.927452484 | 4.446987    | -3.48047 | 0.711451      | 7.21E-05      | 0.002079865 |
| <b>Itga2</b>     | 6.92510264  | 5.056772    | -1.86833 | 0.239365      | 7.49E-05      | 0.002081325 |
| <b>Siglec1</b>   | 6.621906005 | 8.609061    | 1.987155 | 0.296967      | 8.74E-05      | 0.002296544 |
| <b>Pvrl2</b>     | 6.002356701 | 8.437731    | 2.435374 | 0.447647      | 9.33E-05      | 0.002296544 |
| <b>Il1r2</b>     | 7.005826702 | 4.634794    | -2.37103 | 0.429522      | 9.49E-05      | 0.002296544 |

|                |             |          |          |          |             |             |
|----------------|-------------|----------|----------|----------|-------------|-------------|
| <b>Col3a1</b>  | 16.86839857 | 14.54463 | -2.32377 | 0.411035 | 9.01E-05    | 0.002296544 |
| <b>F2rl1</b>   | 5.888497652 | 3.337571 | -2.55093 | 0.500077 | 0.000117452 | 0.002444316 |
| <b>Lta</b>     | 5.834641936 | 3.700027 | -2.13462 | 0.369647 | 0.000116275 | 0.002444316 |
| <b>Kit</b>     | 6.551676691 | 4.463799 | -2.08788 | 0.349473 | 0.000109671 | 0.002444316 |
| <b>Nt5e</b>    | 7.419117941 | 5.253297 | -2.16582 | 0.380509 | 0.000117083 | 0.002444316 |
| <b>Fez1</b>    | 9.518912529 | 7.902379 | -1.61653 | 0.14935  | 0.000108789 | 0.002444316 |
| <b>Cebpb</b>   | 8.257001464 | 10.21381 | 1.956807 | 0.310415 | 0.000120586 | 0.002444316 |
| <b>Cma1</b>    | 6.915178304 | 3.705272 | -3.20991 | 0.690669 | 0.000124315 | 0.002453592 |
| <b>Mr1</b>     | 9.24549433  | 7.000386 | -2.24511 | 0.415321 | 0.0001318   | 0.002534622 |
| <b>Mmp9</b>    | 5.92960019  | 8.017164 | 2.087564 | 0.373784 | 0.00015103  | 0.00283181  |
| <b>Tlr5</b>    | 6.639161594 | 4.543138 | -2.09602 | 0.380241 | 0.00015818  | 0.002893533 |
| <b>Klrb1c</b>  | 5.946043682 | 2.641958 | -3.30409 | 0.742386 | 0.000162632 | 0.002904143 |
| <b>Il23r</b>   | 5.709321516 | 2.468362 | -3.24096 | 0.729841 | 0.000171001 | 0.002982579 |
| <b>Hsd11b1</b> | 10.29957539 | 7.334671 | -2.9649  | 0.664614 | 0.000195652 | 0.003334983 |
| <b>Defb1</b>   | 6.458055334 | 4.116791 | -2.34126 | 0.480058 | 0.000202309 | 0.003371811 |
| <b>Cd207</b>   | 5.924309773 | 4.137874 | -1.78644 | 0.287724 | 0.000208757 | 0.003403647 |
| <b>Elk1</b>    | 6.863222996 | 4.981164 | -1.88206 | 0.341788 | 0.000257038 | 0.003583447 |
| <b>Cd79a</b>   | 4.931218381 | 2.509016 | -2.4222  | 0.52884  | 0.000266159 | 0.003583447 |
| <b>Cd96</b>    | 5.880806731 | 2.544464 | -3.33634 | 0.810146 | 0.000285437 | 0.003583447 |
| <b>Lamp3</b>   | 5.125435004 | 2.51776  | -2.60767 | 0.576103 | 0.000236406 | 0.003583447 |
| <b>Il1a</b>    | 5.745926548 | 3.475849 | -2.27008 | 0.487502 | 0.000291454 | 0.003583447 |
| <b>Ido1</b>    | 5.874673353 | 3.7551   | -2.11957 | 0.430912 | 0.00027058  | 0.003583447 |
| <b>Atg10</b>   | 8.970892135 | 7.244764 | -1.72613 | 0.27693  | 0.000248822 | 0.003583447 |
| <b>Dusp6</b>   | 9.633650329 | 11.22418 | 1.590533 | 0.22748  | 0.000287568 | 0.003583447 |
| <b>Ly96</b>    | 10.01329099 | 7.947379 | -2.06591 | 0.412332 | 0.000270326 | 0.003583447 |
| <b>H60a</b>    | 9.347900871 | 5.708843 | -3.63906 | 0.892955 | 0.000275464 | 0.003583447 |
| <b>Elane</b>   | 5.955688118 | 3.382072 | -2.57362 | 0.568571 | 0.000244253 | 0.003583447 |
| <b>Ripk2</b>   | 8.615113099 | 6.699436 | -1.91568 | 0.344701 | 0.000227596 | 0.003583447 |
| <b>Mnx1</b>    | 4.85246167  | 1.802297 | -3.05016 | 0.708454 | 0.000238539 | 0.003583447 |
| <b>Foxj1</b>   | 5.392375836 | 2.299779 | -3.0926  | 0.738775 | 0.000284788 | 0.003583447 |
| <b>Itgb1</b>   | 14.54012948 | 12.19702 | -2.34311 | 0.50408  | 0.000267756 | 0.003583447 |
| <b>Pparg</b>   | 6.541825113 | 4.401972 | -2.13985 | 0.447234 | 0.000303281 | 0.003668721 |
| <b>Zfp13</b>   | 5.587542722 | 3.439923 | -2.14762 | 0.458002 | 0.000334206 | 0.003978648 |
| <b>Anxa1</b>   | 14.764377   | 11.84734 | -2.91704 | 0.704741 | 0.000340885 | 0.003994746 |

|                 |             |          |          |          |             |             |
|-----------------|-------------|----------|----------|----------|-------------|-------------|
| <b>Ccl25</b>    | 6.263635679 | 4.553889 | -1.70975 | 0.297369 | 0.000346611 | 0.003999354 |
| <b>Il1r1</b>    | 9.203760015 | 7.564152 | -1.63961 | 0.269554 | 0.000358186 | 0.004070291 |
| <b>Cxcr1</b>    | 5.507025078 | 2.223308 | -3.28372 | 0.822597 | 0.000366941 | 0.004107546 |
| <b>Arg2</b>     | 5.597702173 | 3.40951  | -2.18819 | 0.483477 | 0.000383114 | 0.004225526 |
| <b>C2</b>       | 7.338741842 | 5.550325 | -1.78842 | 0.348073 | 0.00043333  | 0.004513855 |
| <b>Tlr7</b>     | 10.02615591 | 7.33097  | -2.69519 | 0.656414 | 0.000417004 | 0.004513855 |
| <b>Ctsl</b>     | 11.58698617 | 9.516914 | -2.07007 | 0.452617 | 0.000430952 | 0.004513855 |
| <b>Il1rl1</b>   | 11.22588383 | 9.146371 | -2.07951 | 0.454796 | 0.000425182 | 0.004513855 |
| <b>Mertk</b>    | 9.375851314 | 7.109517 | -2.26633 | 0.525688 | 0.000457875 | 0.004704195 |
| <b>CD209e</b>   | 5.97695152  | 3.587403 | -2.38955 | 0.569424 | 0.000470634 | 0.004769944 |
| <b>Tlr6</b>     | 7.565254786 | 5.784784 | -1.78047 | 0.35554  | 0.000492077 | 0.004909241 |
| <b>Atf1</b>     | 8.184238118 | 6.76845  | -1.41579 | 0.183965 | 0.00049747  | 0.004909241 |
| <b>Ifnl2</b>    | 6.249201375 | 2.930107 | -3.31909 | 0.87141  | 0.000509007 | 0.004957858 |
| <b>Ccl27a</b>   | 6.003363384 | 3.895558 | -2.10781 | 0.487412 | 0.0005509   | 0.005297119 |
| <b>Klra6</b>    | 7.339968575 | 5.304033 | -2.03594 | 0.469067 | 0.000598819 | 0.005684992 |
| <b>Tnfsf13</b>  | 6.565585293 | 4.857443 | -1.70814 | 0.345523 | 0.000618965 | 0.005731153 |
| <b>Usp9y</b>    | 4.781892804 | 2.696159 | -2.08573 | 0.489779 | 0.000617522 | 0.005731153 |
| <b>Tap1</b>     | 7.363622143 | 9.100727 | 1.737105 | 0.358739 | 0.000628095 | 0.005742943 |
| <b>Il5ra</b>    | 5.257833764 | 2.476767 | -2.78107 | 0.727882 | 0.000637207 | 0.005742943 |
| <b>Klra21</b>   | 4.951766392 | 2.987469 | -1.9643  | 0.450136 | 0.000650867 | 0.005742943 |
| <b>Egr1</b>     | 6.626707146 | 8.295193 | 1.668486 | 0.333049 | 0.00065032  | 0.005742943 |
| <b>Tek</b>      | 6.212232131 | 4.820326 | -1.39191 | 0.19947  | 0.000667426 | 0.005820574 |
| <b>Fut7</b>     | 5.666382558 | 3.764432 | -1.90195 | 0.431846 | 0.000690187 | 0.005949889 |
| <b>Klra15</b>   | 4.889279905 | 2.906119 | -1.98316 | 0.465156 | 0.00071193  | 0.006067586 |
| <b>Havcr2</b>   | 5.944968004 | 3.567083 | -2.37789 | 0.609683 | 0.000743682 | 0.006197348 |
| <b>Rps6</b>     | 9.03559764  | 7.535998 | -1.4996  | 0.26731  | 0.000740391 | 0.006197348 |
| <b>Fcer1a</b>   | 7.009464093 | 4.447646 | -2.56182 | 0.680033 | 0.000801129 | 0.00660271  |
| <b>H2-Ea-ps</b> | 4.709672494 | 2.510285 | -2.19939 | 0.557158 | 0.000822416 | 0.006704477 |
| <b>Lgals3</b>   | 14.12017868 | 12.00901 | -2.11116 | 0.529024 | 0.000854074 | 0.006887694 |
| <b>Traf2</b>    | 7.119579688 | 8.605029 | 1.485449 | 0.276834 | 0.000887566 | 0.007081643 |
| <b>Tlr4</b>     | 11.08070824 | 8.642219 | -2.43849 | 0.650613 | 0.000903619 | 0.007133837 |
| <b>C7</b>       | 5.357968246 | 2.34569  | -3.01228 | 0.848345 | 0.000935165 | 0.007305979 |
| <b>Adora2a</b>  | 5.615210953 | 3.851523 | -1.76369 | 0.406183 | 0.000952979 | 0.007368391 |
| <b>Il21</b>     | 5.169595016 | 2.415934 | -2.75366 | 0.769295 | 0.000995401 | 0.007617865 |

|                |             |          |          |          |             |             |
|----------------|-------------|----------|----------|----------|-------------|-------------|
| <b>Cxcl14</b>  | 9.372493493 | 7.713048 | -1.65945 | 0.369656 | 0.001029881 | 0.007756088 |
| <b>Mapk11</b>  | 5.254180312 | 6.713789 | 1.459609 | 0.278039 | 0.001034145 | 0.007756088 |
| <b>Irf1</b>    | 8.500214046 | 10.14793 | 1.647716 | 0.368117 | 0.001070759 | 0.007873229 |
| <b>Abl1</b>    | 7.075934465 | 8.545817 | 1.469883 | 0.286185 | 0.001068488 | 0.007873229 |
| <b>Tnfsf4</b>  | 5.064526479 | 3.093707 | -1.97082 | 0.503236 | 0.001127088 | 0.007974679 |
| <b>Il13ra1</b> | 10.48076621 | 8.686413 | -1.79435 | 0.432919 | 0.001111486 | 0.007974679 |
| <b>Pla2g6</b>  | 5.856585642 | 7.39432  | 1.537735 | 0.323361 | 0.001124402 | 0.007974679 |
| <b>Gfi1</b>    | 7.237347572 | 4.319907 | -2.91744 | 0.838078 | 0.001110013 | 0.007974679 |
| <b>Psm2</b>    | 12.50532701 | 10.83879 | -1.66653 | 0.382504 | 0.001147729 | 0.008044829 |
| <b>Il23a</b>   | 4.914521483 | 2.216535 | -2.69799 | 0.770427 | 0.001180135 | 0.008195379 |
| <b>Cd46</b>    | 4.710882134 | 2.715189 | -1.99569 | 0.520052 | 0.001214982 | 0.008307941 |
| <b>Ccl26</b>   | 5.115956918 | 2.828201 | -2.28776 | 0.628901 | 0.001218498 | 0.008307941 |
| <b>Atg12</b>   | 10.0033275  | 8.718248 | -1.28508 | 0.200439 | 0.001274995 | 0.008614833 |
| <b>Hif1a</b>   | 12.46404873 | 10.53856 | -1.92549 | 0.500571 | 0.001313992 | 0.008799052 |
| <b>Rora</b>    | 7.490247109 | 5.847196 | -1.64305 | 0.393237 | 0.001438676 | 0.009548733 |
| <b>Gpi1</b>    | 10.83689803 | 12.25694 | 1.420038 | 0.292021 | 0.001485453 | 0.009772716 |
| <b>Mst1r</b>   | 5.184153333 | 3.453765 | -1.73039 | 0.437595 | 0.001550163 | 0.01010976  |
| <b>Psm8</b>    | 9.032059844 | 11.09084 | 2.058778 | 0.571111 | 0.001583619 | 0.010238913 |
| <b>Erb2</b>    | 6.537371421 | 8.067343 | 1.529971 | 0.355628 | 0.001655546 | 0.010612476 |
| <b>Il19</b>    | 5.220505513 | 2.897778 | -2.32273 | 0.677576 | 0.001683665 | 0.010701259 |
| <b>Klra3</b>   | 5.395160334 | 2.257856 | -3.1373  | 0.971901 | 0.001699968 | 0.010714085 |
| <b>S100b</b>   | 5.731628475 | 7.006667 | 1.275038 | 0.226351 | 0.001728523 | 0.010803267 |
| <b>Ccr3</b>    | 5.406877237 | 2.522618 | -2.88426 | 0.889591 | 0.001790077 | 0.011095518 |
| <b>Tnfrsf9</b> | 6.630520862 | 4.968362 | -1.66216 | 0.424099 | 0.001823166 | 0.011207985 |
| <b>Smad4</b>   | 11.32940025 | 9.482668 | -1.84673 | 0.508725 | 0.001953944 | 0.011766443 |
| <b>Muc1</b>    | 7.452607297 | 5.174665 | -2.27794 | 0.67915  | 0.001972744 | 0.011766443 |
| <b>Dpp4</b>    | 7.197998973 | 5.393466 | -1.80453 | 0.49272  | 0.001981073 | 0.011766443 |
| <b>Il12rb2</b> | 4.792906599 | 3.107779 | -1.68513 | 0.441427 | 0.00196597  | 0.011766443 |
| <b>Spn</b>     | 6.515822435 | 8.096963 | 1.581141 | 0.396805 | 0.001992451 | 0.011766443 |
| <b>Cxcl15</b>  | 4.809019903 | 2.389975 | -2.41904 | 0.734638 | 0.002010109 | 0.01177798  |
| <b>Klra1</b>   | 5.621755633 | 2.830618 | -2.79114 | 0.886834 | 0.002234933 | 0.012542566 |
| <b>Gtf3c1</b>  | 7.428200059 | 8.551271 | 1.123071 | 0.146476 | 0.002240939 | 0.012542566 |
| <b>Mapk14</b>  | 8.90886984  | 10.09794 | 1.189072 | 0.195913 | 0.002193638 | 0.012542566 |
| <b>Vim</b>     | 12.93582627 | 14.26985 | 1.334024 | 0.286611 | 0.002237215 | 0.012542566 |

|                 |             |          |          |          |             |             |
|-----------------|-------------|----------|----------|----------|-------------|-------------|
| <b>Lrrn3</b>    | 9.329490566 | 7.149765 | -2.17973 | 0.653448 | 0.002186793 | 0.012542566 |
| <b>Psemb10</b>  | 6.685705178 | 8.024116 | 1.338411 | 0.286143 | 0.002174167 | 0.012542566 |
| <b>Map4k2</b>   | 5.32180832  | 7.197323 | 1.875515 | 0.535743 | 0.002260067 | 0.012555929 |
| <b>Tnfsf11</b>  | 6.065538913 | 4.440468 | -1.62507 | 0.431492 | 0.002319136 | 0.012604001 |
| <b>F13a1</b>    | 13.68207055 | 11.82535 | -1.85672 | 0.530099 | 0.002305465 | 0.012604001 |
| <b>Ccl5</b>     | 6.403766291 | 8.186662 | 1.782896 | 0.499778 | 0.002317266 | 0.012604001 |
| <b>Bst1</b>     | 9.550194016 | 7.860705 | -1.68949 | 0.460766 | 0.002340111 | 0.012626498 |
| <b>Abca1</b>    | 11.62139654 | 9.55881  | -2.06259 | 0.61606  | 0.002358267 | 0.012633571 |
| <b>Smad2</b>    | 8.518875715 | 7.395418 | -1.12346 | 0.155701 | 0.002391604 | 0.012721296 |
| <b>H2-Q1</b>    | 4.559778418 | 2.038136 | -2.52164 | 0.798952 | 0.002455156 | 0.012763235 |
| <b>Tnfrsf14</b> | 6.360784453 | 7.991899 | 1.631114 | 0.440435 | 0.002467559 | 0.012763235 |
| <b>Il2rg</b>    | 5.092348217 | 6.856961 | 1.764612 | 0.497781 | 0.002448795 | 0.012763235 |
| <b>Mpped1</b>   | 4.791511341 | 2.13563  | -2.65588 | 0.848508 | 0.002434906 | 0.012763235 |
| <b>Trp53</b>    | 7.793858473 | 9.052347 | 1.258488 | 0.25669  | 0.002542207 | 0.013059282 |
| <b>Ccl19</b>    | 6.534156192 | 4.468102 | -2.06605 | 0.629834 | 0.002626134 | 0.013398641 |
| <b>Ccr1</b>     | 10.41723035 | 8.642009 | -1.77522 | 0.510544 | 0.002647562 | 0.0134167   |
| <b>Clec4n</b>   | 10.0304781  | 8.119724 | -1.91075 | 0.571342 | 0.002741208 | 0.013798029 |
| <b>Gpr183</b>   | 7.19146836  | 5.902028 | -1.28944 | 0.289324 | 0.002929603 | 0.014648014 |
| <b>Msr1</b>     | 11.72775007 | 9.812099 | -1.91565 | 0.581896 | 0.002956117 | 0.014682701 |
| <b>Pmch</b>     | 4.942010534 | 2.94607  | -1.99594 | 0.623124 | 0.003163266 | 0.015608219 |
| <b>Cd40lg</b>   | 7.101840786 | 4.880836 | -2.221   | 0.718703 | 0.003261189 | 0.015882415 |
| <b>Cd55</b>     | 6.971191294 | 5.340942 | -1.63025 | 0.468545 | 0.003246962 | 0.015882415 |
| <b>Epcam</b>    | 7.621219763 | 5.353439 | -2.26778 | 0.740123 | 0.00332695  | 0.016098147 |
| <b>Lyz2</b>     | 16.01938736 | 14.2451  | -1.77429 | 0.53887  | 0.003442778 | 0.0163423   |
| <b>Ccr9</b>     | 6.937114388 | 5.082061 | -1.85505 | 0.573754 | 0.003442747 | 0.0163423   |
| <b>Cd86</b>     | 9.044578147 | 7.25631  | -1.78827 | 0.544548 | 0.003430345 | 0.0163423   |
| <b>Ctsg</b>     | 5.028781238 | 3.383671 | -1.64511 | 0.48392  | 0.003518723 | 0.016597749 |
| <b>Stat3</b>    | 9.010185768 | 10.18221 | 1.172027 | 0.239252 | 0.003562224 | 0.016697924 |
| <b>Il2</b>      | 5.011850217 | 2.2536   | -2.75825 | 0.949218 | 0.003683821 | 0.017137313 |
| <b>Il27</b>     | 4.52795712  | 2.214017 | -2.31394 | 0.774868 | 0.003749522 | 0.017137313 |
| <b>Egfr</b>     | 7.053234733 | 5.295557 | -1.75768 | 0.542564 | 0.003793059 | 0.017137313 |
| <b>Amica1</b>   | 8.425875637 | 6.699418 | -1.72646 | 0.5268   | 0.003728647 | 0.017137313 |
| <b>Cd99</b>     | 10.07541437 | 8.659812 | -1.4156  | 0.380366 | 0.003707151 | 0.017137313 |
| <b>Il15</b>     | 8.107422022 | 6.381546 | -1.72588 | 0.528423 | 0.003791365 | 0.017137313 |

|                  |             |          |          |          |             |             |
|------------------|-------------|----------|----------|----------|-------------|-------------|
| <b>S100a8</b>    | 9.925300766 | 8.097387 | -1.82791 | 0.576412 | 0.003894858 | 0.017491877 |
| <b>Il1rl2</b>    | 6.70606596  | 5.437632 | -1.26843 | 0.308314 | 0.003932805 | 0.017557165 |
| <b>Mef2c</b>     | 11.20574335 | 9.584626 | -1.62112 | 0.486658 | 0.003986967 | 0.017589559 |
| <b>Bcl2</b>      | 6.787172872 | 8.034409 | 1.247236 | 0.297273 | 0.003973625 | 0.017589559 |
| <b>Ccl28</b>     | 4.755808639 | 2.236309 | -2.5195  | 0.867638 | 0.004013498 | 0.017603063 |
| <b>Cd164</b>     | 12.66255214 | 10.92769 | -1.73487 | 0.540103 | 0.004055278 | 0.017682898 |
| <b>Thbd</b>      | 7.535547803 | 6.066118 | -1.46943 | 0.418909 | 0.00414429  | 0.017966575 |
| <b>Cklf</b>      | 7.538435714 | 6.19069  | -1.34775 | 0.358346 | 0.004191774 | 0.018067994 |
| <b>Tlr8</b>      | 10.38065383 | 8.634509 | -1.74615 | 0.550001 | 0.004229132 | 0.018124852 |
| <b>Bid</b>       | 7.564870619 | 8.866185 | 1.301314 | 0.338029 | 0.004377808 | 0.018550035 |
| <b>Fasl</b>      | 5.431243354 | 3.543564 | -1.88768 | 0.616118 | 0.004364145 | 0.018550035 |
| <b>Icam4</b>     | 5.047375916 | 2.948588 | -2.09879 | 0.711449 | 0.00452935  | 0.019084341 |
| <b>Il17b</b>     | 5.882778723 | 3.97435  | -1.90843 | 0.630687 | 0.004562668 | 0.019117322 |
| <b>Cd276</b>     | 6.692577655 | 7.992524 | 1.299947 | 0.343721 | 0.004648355 | 0.019322311 |
| <b>Mcam</b>      | 7.770274411 | 8.94017  | 1.169895 | 0.269187 | 0.004711442 | 0.019322311 |
| <b>Colec12</b>   | 11.2852294  | 9.491189 | -1.79404 | 0.584319 | 0.004714644 | 0.019322311 |
| <b>Nfatc2</b>    | 5.235766052 | 6.706561 | 1.470795 | 0.433199 | 0.004697338 | 0.019322311 |
| <b>Masp2</b>     | 5.256660577 | 3.28932  | -1.96734 | 0.664986 | 0.004882318 | 0.019686767 |
| <b>Atg5</b>      | 9.14338654  | 7.815194 | -1.32819 | 0.364108 | 0.004872639 | 0.019686767 |
| <b>Ccl6</b>      | 10.88477156 | 9.121719 | -1.76305 | 0.57442  | 0.004872535 | 0.019686767 |
| <b>Dusp4</b>     | 7.705161859 | 8.816484 | 1.111322 | 0.237171 | 0.004993297 | 0.020026592 |
| <b>C8b</b>       | 6.377532822 | 3.664706 | -2.71283 | 0.986098 | 0.005145838 | 0.02052861  |
| <b>Ifna1</b>     | 6.976548079 | 4.553183 | -2.42337 | 0.872627 | 0.005359473 | 0.021155814 |
| <b>Akt3</b>      | 10.81760718 | 9.48254  | -1.33507 | 0.377779 | 0.005339028 | 0.021155814 |
| <b>Tnfrsf10b</b> | 8.258420371 | 7.148154 | -1.11027 | 0.25096  | 0.00564789  | 0.02206207  |
| <b>Ctsh</b>      | 11.16486347 | 9.586739 | -1.57812 | 0.505929 | 0.005633098 | 0.02206207  |
| <b>Pnma1</b>     | 5.672207599 | 3.674007 | -1.9982  | 0.699197 | 0.005698772 | 0.022145485 |
| <b>Smpd3</b>     | 6.736354283 | 5.525478 | -1.21088 | 0.316794 | 0.005768193 | 0.022296366 |
| <b>Gzmm</b>      | 4.457252594 | 3.02738  | -1.42987 | 0.436252 | 0.005797055 | 0.022296366 |
| <b>Map2k1</b>    | 11.28062623 | 10.01323 | -1.26739 | 0.352535 | 0.005936682 | 0.022601583 |
| <b>Cxcl13</b>    | 9.65662312  | 7.167971 | -2.48865 | 0.916135 | 0.005916764 | 0.022601583 |
| <b>Ifnb1</b>     | 5.318388579 | 3.243708 | -2.07468 | 0.741087 | 0.006043176 | 0.022799145 |
| <b>Il1rap</b>    | 10.26430865 | 8.51461  | -1.7497  | 0.595206 | 0.006049478 | 0.022799145 |
| <b>Ikzf2</b>     | 7.702327174 | 6.60475  | -1.09758 | 0.251008 | 0.006079772 | 0.022799145 |

|                |             |          |          |          |             |             |
|----------------|-------------|----------|----------|----------|-------------|-------------|
| <b>Cd80</b>    | 7.025299021 | 5.754671 | -1.27063 | 0.358487 | 0.006159998 | 0.022985068 |
| <b>Abcb1a</b>  | 7.02065389  | 5.792581 | -1.22807 | 0.335675 | 0.00623858  | 0.023163046 |
| <b>Cr2</b>     | 4.816162191 | 3.186868 | -1.62929 | 0.547723 | 0.006500642 | 0.02401715  |
| <b>C4b</b>     | 9.126494729 | 10.32656 | 1.200068 | 0.324988 | 0.006563814 | 0.024131671 |
| <b>Cd163</b>   | 8.532873769 | 6.736632 | -1.79624 | 0.628821 | 0.006640706 | 0.024295266 |
| <b>Tank</b>    | 10.41238546 | 8.826935 | -1.58545 | 0.532824 | 0.006835372 | 0.024886063 |
| <b>Chit1</b>   | 6.430470729 | 4.407735 | -2.02274 | 0.739997 | 0.007031342 | 0.025475877 |
| <b>Cxcl12</b>  | 10.70099044 | 11.75426 | 1.053265 | 0.239753 | 0.007172197 | 0.025861287 |
| <b>Atg7</b>    | 6.911158514 | 8.023186 | 1.112028 | 0.282633 | 0.007313562 | 0.026244838 |
| <b>Il13</b>    | 5.655069278 | 3.727662 | -1.92741 | 0.704876 | 0.007438902 | 0.026441596 |
| <b>Itga1</b>   | 8.938559258 | 7.709923 | -1.22864 | 0.356013 | 0.007432042 | 0.026441596 |
| <b>Creb5</b>   | 7.264265916 | 5.945447 | -1.31882 | 0.409561 | 0.00762557  | 0.026977252 |
| <b>Tfrc</b>    | 11.32689166 | 9.939999 | -1.38689 | 0.447139 | 0.007700076 | 0.027112945 |
| <b>Cd7</b>     | 6.182486698 | 4.827213 | -1.35527 | 0.434818 | 0.007992645 | 0.027627306 |
| <b>Tgfb1</b>   | 8.790130433 | 10.11095 | 1.320823 | 0.416221 | 0.007993501 | 0.027627306 |
| <b>Trem1</b>   | 6.948444412 | 5.536443 | -1.412   | 0.464527 | 0.007975121 | 0.027627306 |
| <b>Ms4a2</b>   | 5.547174978 | 3.704003 | -1.84317 | 0.674498 | 0.007901987 | 0.027627306 |
| <b>Ifih1</b>   | 8.329638409 | 6.854399 | -1.47524 | 0.499348 | 0.008119542 | 0.027934203 |
| <b>Tnfsf8</b>  | 4.980227766 | 3.633839 | -1.34639 | 0.435187 | 0.008342207 | 0.028439342 |
| <b>Igll1</b>   | 4.826617235 | 2.915934 | -1.91068 | 0.713329 | 0.008311237 | 0.028439342 |
| <b>Il17f</b>   | 4.881264529 | 2.263416 | -2.61785 | 1.038463 | 0.008570917 | 0.029086823 |
| <b>Vcam1</b>   | 11.19810109 | 9.454588 | -1.74351 | 0.64074  | 0.008694659 | 0.029373848 |
| <b>Mefv</b>    | 6.281773533 | 4.967444 | -1.31433 | 0.424241 | 0.008803269 | 0.029607407 |
| <b>Ifna4</b>   | 6.769977221 | 3.911925 | -2.85805 | 1.152298 | 0.008898078 | 0.029792673 |
| <b>H2-Dma</b>  | 6.480034913 | 8.487141 | 2.007106 | 0.769305 | 0.008938433 | 0.029794778 |
| <b>Cd34</b>    | 9.320480208 | 8.232267 | -1.08821 | 0.293092 | 0.009091978 | 0.030039574 |
| <b>Cxcl3</b>   | 5.377687179 | 3.138716 | -2.23897 | 0.878792 | 0.009084808 | 0.030039574 |
| <b>Pax5</b>    | 6.207257241 | 4.596787 | -1.61047 | 0.586737 | 0.009419916 | 0.030986565 |
| <b>Pik3cg</b>  | 7.774979527 | 6.461838 | -1.31314 | 0.437155 | 0.009832987 | 0.031925282 |
| <b>Ifit2</b>   | 9.208216016 | 7.641737 | -1.56648 | 0.570268 | 0.009817062 | 0.031925282 |
| <b>Cdkn1a</b>  | 9.63094737  | 10.55714 | 0.926193 | 0.177334 | 0.009819143 | 0.031925282 |
| <b>Jak3</b>    | 6.267496364 | 7.482883 | 1.215387 | 0.383881 | 0.01002215  | 0.032399193 |
| <b>Il22ra2</b> | 6.494642902 | 4.726654 | -1.76799 | 0.678035 | 0.010365564 | 0.033222962 |
| <b>Itga4</b>   | 9.218163594 | 7.946731 | -1.27143 | 0.419948 | 0.0103319   | 0.033222962 |

|                |             |          |          |          |             |             |
|----------------|-------------|----------|----------|----------|-------------|-------------|
| <b>Il13ra2</b> | 4.905284028 | 3.709101 | -1.19618 | 0.377371 | 0.010425492 | 0.033272846 |
| <b>Klrg1</b>   | 5.882288344 | 4.291307 | -1.59098 | 0.59157  | 0.010474852 | 0.033288725 |
| <b>Atm</b>     | 9.395264128 | 7.912087 | -1.48318 | 0.539176 | 0.010705063 | 0.033876783 |
| <b>Ifna2</b>   | 5.115459779 | 3.703012 | -1.41245 | 0.505388 | 0.010995622 | 0.034599198 |
| <b>Il4</b>     | 4.60076133  | 2.965863 | -1.6349  | 0.621017 | 0.011025611 | 0.034599198 |
| <b>Mapk1</b>   | 11.87703289 | 10.68549 | -1.19154 | 0.38238  | 0.011100888 | 0.034690274 |
| <b>Mapk8</b>   | 9.915726422 | 8.363591 | -1.55214 | 0.582888 | 0.011344638 | 0.035304892 |
| <b>H2-D1</b>   | 11.96554042 | 12.96042 | 0.994877 | 0.256945 | 0.011503107 | 0.035503417 |
| <b>Cxcr5</b>   | 5.131548388 | 3.171755 | -1.95979 | 0.787632 | 0.011499285 | 0.035503417 |
| <b>Igf2r</b>   | 8.980592874 | 10.12261 | 1.142017 | 0.357206 | 0.011558614 | 0.035528528 |
| <b>Psmc7</b>   | 11.24299419 | 10.23996 | -1.00304 | 0.265609 | 0.011730857 | 0.035910787 |
| <b>Tbx21</b>   | 6.646553476 | 4.858877 | -1.78768 | 0.708437 | 0.011866599 | 0.036178657 |
| <b>Cx3cr1</b>  | 8.829913902 | 9.860676 | 1.030763 | 0.288125 | 0.011959326 | 0.036313744 |
| <b>Ccr8</b>    | 6.810981472 | 5.223934 | -1.58705 | 0.610285 | 0.012117208 | 0.036635636 |
| <b>Lamp2</b>   | 13.76359832 | 12.36735 | -1.39625 | 0.510114 | 0.012163031 | 0.036635636 |
| <b>Tnf</b>     | 5.522326895 | 4.085655 | -1.43667 | 0.532482 | 0.012213716 | 0.036641148 |
| <b>Oas3</b>    | 6.475809119 | 5.113789 | -1.36202 | 0.494098 | 0.012409601 | 0.03708048  |
| <b>Eng</b>     | 8.420637746 | 9.33175  | 0.911112 | 0.202031 | 0.012713337 | 0.037837311 |
| <b>Stat1</b>   | 8.568031456 | 9.877079 | 1.309048 | 0.469293 | 0.012856458 | 0.038112028 |
| <b>Tab1</b>    | 6.957570444 | 8.129687 | 1.172117 | 0.392218 | 0.013158549 | 0.038701613 |
| <b>Tgfbr1</b>  | 10.62190706 | 9.2492   | -1.37271 | 0.507718 | 0.013139363 | 0.038701613 |
| <b>Il22ra1</b> | 6.3094534   | 4.635497 | -1.67396 | 0.668168 | 0.013236236 | 0.038778035 |
| <b>Il18r1</b>  | 7.58633775  | 6.187441 | -1.3989  | 0.523956 | 0.013317717 | 0.038864932 |
| <b>Ccnd3</b>   | 7.255305661 | 8.316892 | 1.061586 | 0.324331 | 0.013433346 | 0.039009439 |
| <b>Bmi1</b>    | 9.714397816 | 8.517991 | -1.19641 | 0.40996  | 0.01347126  | 0.039009439 |
| <b>Cd53</b>    | 7.770638542 | 6.469844 | -1.30079 | 0.473023 | 0.013690111 | 0.039388481 |
| <b>Txk</b>     | 5.632507265 | 4.191826 | -1.44068 | 0.550744 | 0.013707191 | 0.039388481 |
| <b>Cd9</b>     | 11.51071209 | 10.42366 | -1.08706 | 0.345277 | 0.013859489 | 0.039674109 |
| <b>Fcer2a</b>  | 4.903374532 | 2.673767 | -2.22961 | 0.955821 | 0.014100683 | 0.040207545 |
| <b>Nfkb2</b>   | 9.057086697 | 10.13305 | 1.07596  | 0.340703 | 0.014153056 | 0.040207545 |
| <b>Maf</b>     | 6.502936809 | 7.372106 | 0.869169 | 0.181808 | 0.014457985 | 0.040918824 |
| <b>Il17a</b>   | 4.551524653 | 3.259028 | -1.2925  | 0.478473 | 0.014755576 | 0.041604068 |
| <b>Il7r</b>    | 6.661815525 | 5.488377 | -1.17344 | 0.40862  | 0.014822839 | 0.041637188 |
| <b>Thy1</b>    | 7.963145162 | 6.890846 | -1.0723  | 0.347002 | 0.01512529  | 0.042328236 |



|                |             |          |          |          |             |             |
|----------------|-------------|----------|----------|----------|-------------|-------------|
| <b>Cd97</b>    | 7.396865327 | 8.307704 | 0.910839 | 0.237181 | 0.016189723 | 0.045079625 |
| <b>Il6</b>     | 6.527210546 | 4.832952 | -1.69426 | 0.711552 | 0.016228665 | 0.045079625 |
| <b>Nfatc4</b>  | 5.86129641  | 5.048174 | -0.81312 | 0.148076 | 0.0170162   | 0.047092804 |
| <b>Jak1</b>    | 11.41968485 | 10.1194  | -1.30028 | 0.506497 | 0.017435724 | 0.048076444 |
| <b>C6</b>      | 6.740726273 | 5.643864 | -1.09686 | 0.384192 | 0.017691471 | 0.048602943 |
| <b>Blk</b>     | 4.559778418 | 2.471505 | -2.08827 | 0.943859 | 0.01881502  | 0.05131369  |
| <b>A2m</b>     | 7.078837739 | 5.60103  | -1.47781 | 0.618665 | 0.018789471 | 0.05131369  |
| <b>Tnfsf15</b> | 5.320837382 | 3.912593 | -1.40824 | 0.584388 | 0.019374955 | 0.052017984 |
| <b>Ikbkb</b>   | 7.632300075 | 8.46681  | 0.83451  | 0.194995 | 0.019420047 | 0.052017984 |
| <b>Stat5b</b>  | 8.901849949 | 7.877955 | -1.0239  | 0.347543 | 0.019347234 | 0.052017984 |
| <b>H2-K1</b>   | 9.507243165 | 10.62619 | 1.118946 | 0.409517 | 0.019160723 | 0.052017984 |
| <b>Ctla4</b>   | 7.065224716 | 5.709158 | -1.35607 | 0.554526 | 0.019377875 | 0.052017984 |
| <b>Il11ra1</b> | 6.955523344 | 5.750276 | -1.20525 | 0.46733  | 0.019675617 | 0.052514992 |
| <b>Csf3</b>    | 6.517281138 | 4.02742  | -2.48986 | 1.163967 | 0.020000339 | 0.053004431 |
| <b>Prf1</b>    | 5.945941803 | 4.744438 | -1.2015  | 0.466939 | 0.019935298 | 0.053004431 |
| <b>Il5</b>     | 6.358866699 | 4.581917 | -1.77695 | 0.794542 | 0.020222141 | 0.05340354  |
| <b>Hcst</b>    | 6.678316098 | 5.686753 | -0.99156 | 0.333454 | 0.020591936 | 0.054189304 |
| <b>Ltf</b>     | 6.022567283 | 4.098506 | -1.92406 | 0.878311 | 0.020769879 | 0.054466467 |
| <b>Klra5</b>   | 6.027416423 | 4.615582 | -1.41183 | 0.605044 | 0.021759187 | 0.056861988 |
| <b>Spp1</b>    | 14.70371314 | 13.36357 | -1.34014 | 0.565503 | 0.022060802 | 0.057450005 |
| <b>Tnfsf12</b> | 6.650773694 | 7.490615 | 0.839841 | 0.221581 | 0.022154531 | 0.057494457 |
| <b>Il17rb</b>  | 6.410047661 | 4.704572 | -1.70548 | 0.778404 | 0.022794653 | 0.05895169  |
| <b>Reps1</b>   | 8.081061937 | 8.869932 | 0.78887  | 0.185626 | 0.024322632 | 0.062638707 |
| <b>Tap2</b>    | 6.568212361 | 7.668111 | 1.099898 | 0.432093 | 0.024387337 | 0.062638707 |
| <b>Kdr</b>     | 7.306024125 | 6.423813 | -0.88221 | 0.275237 | 0.024605475 | 0.062983297 |
| <b>Gata3</b>   | 5.326408572 | 6.458745 | 1.132336 | 0.456126 | 0.024851342 | 0.063224991 |
| <b>Sh2d1b1</b> | 6.542795498 | 4.778331 | -1.76446 | 0.828259 | 0.024868496 | 0.063224991 |
| <b>Clec5a</b>  | 8.815578244 | 7.3842   | -1.43138 | 0.64057  | 0.025105341 | 0.063611505 |
| <b>Tnfrsf8</b> | 4.952465578 | 3.549613 | -1.40285 | 0.625368 | 0.025332294 | 0.06397044  |
| <b>Casp1</b>   | 10.41744879 | 9.102713 | -1.31474 | 0.578711 | 0.026245498 | 0.066054105 |
| <b>Cd38</b>    | 9.717962463 | 8.784881 | -0.93308 | 0.32867  | 0.026810594 | 0.067250654 |
| <b>Ifi44</b>   | 8.195027448 | 9.517962 | 1.322935 | 0.588585 | 0.027017196 | 0.067542991 |
| <b>Nfatc3</b>  | 8.221144429 | 7.207427 | -1.01372 | 0.392023 | 0.027587792 | 0.068740346 |
| <b>Cd244</b>   | 6.526288343 | 5.288999 | -1.23729 | 0.54051  | 0.027785717 | 0.069004265 |

|                 |             |          |          |          |             |             |
|-----------------|-------------|----------|----------|----------|-------------|-------------|
| <b>Oasl1</b>    | 5.31881516  | 6.476989 | 1.158174 | 0.491319 | 0.027975159 | 0.069017663 |
| <b>Bcl10</b>    | 10.03870914 | 9.116011 | -0.9227  | 0.326774 | 0.027908442 | 0.069017663 |
| <b>Ccl11</b>    | 7.945046334 | 6.750656 | -1.19439 | 0.515237 | 0.028093771 | 0.069083042 |
| <b>Il17ra</b>   | 7.251089746 | 8.034459 | 0.783369 | 0.206474 | 0.028286737 | 0.0693128   |
| <b>Cd36</b>     | 8.875754667 | 7.459215 | -1.41654 | 0.65357  | 0.02837204  | 0.0693128   |
| <b>C3ar1</b>    | 11.25593616 | 10.17277 | -1.08317 | 0.445163 | 0.028562119 | 0.069444908 |
| <b>Hmgb1</b>    | 11.9620862  | 10.84925 | -1.11284 | 0.465245 | 0.028611302 | 0.069444908 |
| <b>Mbl2</b>     | 5.135652179 | 3.445873 | -1.68978 | 0.816151 | 0.028773472 | 0.069447483 |
| <b>Sigirr</b>   | 5.667940547 | 6.979751 | 1.31181  | 0.593321 | 0.028890153 | 0.069447483 |
| <b>Slamf1</b>   | 5.097172507 | 3.697638 | -1.39953 | 0.646368 | 0.028844174 | 0.069447483 |
| <b>Chil3</b>    | 9.625430378 | 7.668434 | -1.957   | 0.975427 | 0.029712398 | 0.071195842 |
| <b>Flt3</b>     | 5.318388579 | 4.366007 | -0.95238 | 0.360493 | 0.030015423 | 0.07169289  |
| <b>Cd69</b>     | 6.831389577 | 5.624097 | -1.20729 | 0.536936 | 0.030470112 | 0.072451607 |
| <b>Tmem173</b>  | 5.870001299 | 7.03985  | 1.169849 | 0.513113 | 0.030526277 | 0.072451607 |
| <b>Csf2</b>     | 5.008791729 | 3.897075 | -1.11172 | 0.477177 | 0.030960264 | 0.072811792 |
| <b>Xcr1</b>     | 6.304517814 | 5.085838 | -1.21868 | 0.546974 | 0.030969282 | 0.072811792 |
| <b>Ccl20</b>    | 5.666837667 | 4.127751 | -1.53909 | 0.742615 | 0.030871982 | 0.072811792 |
| <b>Thbs1</b>    | 10.65699517 | 9.515919 | -1.14108 | 0.498469 | 0.031304957 | 0.073370993 |
| <b>Ccr4</b>     | 5.172951638 | 3.511966 | -1.66099 | 0.819456 | 0.031622384 | 0.073884075 |
| <b>Apoe</b>     | 13.30372285 | 12.0539  | -1.24982 | 0.574553 | 0.032381084 | 0.07542178  |
| <b>Lcn2</b>     | 8.305666868 | 6.556861 | -1.74881 | 0.880304 | 0.032992199 | 0.076323559 |
| <b>Tnfrsf18</b> | 6.007970051 | 4.741453 | -1.26652 | 0.59003  | 0.033277072 | 0.076323559 |
| <b>Il10ra</b>   | 6.283263127 | 7.257034 | 0.973771 | 0.392132 | 0.033190718 | 0.076323559 |
| <b>Ppbp</b>     | 6.50338121  | 5.239005 | -1.26438 | 0.587944 | 0.033142988 | 0.076323559 |
| <b>Sh2b2</b>    | 4.53206908  | 5.457069 | 0.925    | 0.35446  | 0.0329686   | 0.076323559 |
| <b>Cd274</b>    | 6.539699567 | 7.558494 | 1.018795 | 0.427146 | 0.033717863 | 0.077098771 |
| <b>Tnfrsf17</b> | 4.655096128 | 3.060113 | -1.59498 | 0.795964 | 0.034003627 | 0.077515868 |
| <b>Hc</b>       | 5.299803057 | 3.161581 | -2.13822 | 1.114407 | 0.034140064 | 0.077591055 |
| <b>Cd1d2</b>    | 6.512657384 | 5.240376 | -1.27228 | 0.599743 | 0.034404129 | 0.077954976 |
| <b>Cd247</b>    | 6.695091938 | 5.760892 | -0.9342  | 0.370375 | 0.034848399 | 0.078018804 |
| <b>Psmb7</b>    | 11.6508082  | 10.41797 | -1.23283 | 0.576382 | 0.034772506 | 0.078018804 |
| <b>Itgae</b>    | 6.546680357 | 5.568849 | -0.97783 | 0.402788 | 0.03481101  | 0.078018804 |
| <b>Fcer1g</b>   | 10.60010129 | 9.683561 | -0.91654 | 0.355913 | 0.034657689 | 0.078018804 |
| <b>Cfd</b>      | 8.177882822 | 6.380231 | -1.79765 | 0.924007 | 0.035167705 | 0.078266406 |

|                |             |          |          |          |             |             |
|----------------|-------------|----------|----------|----------|-------------|-------------|
| <b>Arg1</b>    | 10.36179238 | 11.5277  | 1.165908 | 0.534349 | 0.035102138 | 0.078266406 |
| <b>Ccrl2</b>   | 6.254511662 | 5.20168  | -1.05283 | 0.459529 | 0.035488542 | 0.078746765 |
| <b>Ncf4</b>    | 8.485576725 | 9.351264 | 0.865687 | 0.320617 | 0.035826362 | 0.079261864 |
| <b>Tal1</b>    | 6.585354913 | 5.266525 | -1.31883 | 0.637569 | 0.035955843 | 0.079314359 |
| <b>Mrc1</b>    | 12.63009733 | 11.37082 | -1.25927 | 0.600328 | 0.036109242 | 0.079419154 |
| <b>Socs1</b>   | 8.876175158 | 7.733087 | -1.14309 | 0.524954 | 0.036281669 | 0.079565064 |
| <b>Casp3</b>   | 10.11717055 | 9.200449 | -0.91672 | 0.364768 | 0.036570911 | 0.079965549 |
| <b>Cd4</b>     | 5.9611638   | 4.898861 | -1.0623  | 0.473681 | 0.037108049 | 0.080686311 |
| <b>Ptgdr2</b>  | 6.022828902 | 4.281608 | -1.74122 | 0.903435 | 0.037115703 | 0.080686311 |
| <b>Batf</b>    | 6.622562401 | 5.564946 | -1.05762 | 0.471035 | 0.037244375 | 0.080732026 |
| <b>Klrb1</b>   | 6.229717811 | 4.658503 | -1.57121 | 0.808957 | 0.038516805 | 0.08324958  |
| <b>Epsti1</b>  | 3.932066497 | 2.316874 | -1.61519 | 0.837053 | 0.038709308 | 0.083425233 |
| <b>Cfh</b>     | 10.87081195 | 9.781593 | -1.08922 | 0.504542 | 0.039789243 | 0.08550697  |
| <b>Pin1</b>    | 7.080097158 | 6.212636 | -0.86746 | 0.341574 | 0.040302185 | 0.086361825 |
| <b>Tgfb3</b>   | 7.721487664 | 8.704955 | 0.983467 | 0.435418 | 0.041271193 | 0.088186309 |
| <b>Igf1r</b>   | 7.843422652 | 8.742834 | 0.899412 | 0.374281 | 0.041999218 | 0.089486969 |
| <b>Klrc2</b>   | 6.495975464 | 5.192897 | -1.30308 | 0.663443 | 0.043120363 | 0.091615501 |
| <b>Dock9</b>   | 8.616338454 | 7.878119 | -0.73822 | 0.238366 | 0.043823226 | 0.09214085  |
| <b>Ccl1</b>    | 6.172002535 | 4.914993 | -1.25701 | 0.63651  | 0.043859044 | 0.09214085  |
| <b>Syt17</b>   | 6.516728105 | 5.283853 | -1.23287 | 0.619992 | 0.043763869 | 0.09214085  |
| <b>Mill2</b>   | 8.510379975 | 7.709418 | -0.80096 | 0.298556 | 0.043755865 | 0.09214085  |
| <b>Cd200r1</b> | 8.131508822 | 6.858359 | -1.27315 | 0.649656 | 0.044385743 | 0.092986893 |
| <b>Hras</b>    | 6.113176818 | 5.054599 | -1.05858 | 0.51023  | 0.046220844 | 0.096561652 |
| <b>H2-Eb1</b>  | 9.977117219 | 11.25847 | 1.281355 | 0.666733 | 0.046928932 | 0.097683417 |
| <b>Tpsab1</b>  | 6.202183906 | 4.940171 | -1.26201 | 0.654176 | 0.047018285 | 0.097683417 |
| <b>Notch1</b>  | 7.378967767 | 8.25926  | 0.880293 | 0.380403 | 0.047519404 | 0.098451805 |
