# Supplementary material
Source: PubMed Central journal article supplement (PMC6440870)
Supplement: NIHMS1509874-supplement-11.pdf [file NIHMS1509874-supplement-11.pdf]

**Supplementary Table 7.** Antibodies used in IHC, Western blot, flow cytometry and in vivo protocols

| <b>Marker</b> | <b>Application (Details)</b>      | <b>Primary Ab (dilution)</b>                                         |
|---------------|-----------------------------------|----------------------------------------------------------------------|
| CD8           | IHC<br>(Tris-EDTA Buffer, pH 9.0) | Cell Signaling, clone D4W2Z (1:100)                                  |
| FoxP3         | IHC<br>(Tris-EDTA Buffer, pH 9.0) | eBioscience, clone FJK-16s (1:50)                                    |
| CD274         | IHC<br>(Citrate Buffer, pH 6.0)   | R&D Systems, polyclonal (1:100)                                      |
| CD274         | Western blot                      | Cell Signaling, clone (E1L3N <sup>®</sup> ) XP <sup>®</sup> (1:1000) |
| cGAS          | Western blot                      | Cell Signaling, clone D3080 (1:1000)                                 |
| STING         | Western blot                      | Cell Signaling, clone D2P2F (1:1000)                                 |
| GAPDH         | Western blot                      | Cell Signaling, clone 14C10 (1:5000)                                 |
| CD274         | Flow cytometry (PE)               | BD Pharmingen, clone MIH1 (1:100)                                    |
| CD274         | Flow cytometry (APC)              | BD Pharmingen, clone MIH5 (1:100)                                    |
| H-2K[b]       | Flow cytometry (BV421)            | BD Pharmingen, clone AF6-88.5 (1:100)                                |
| CRT           | Flow cytometry (Purified)         | Abcam, polyclonal (1:100)                                            |
| CD274         | <i>In Vivo</i> treatment          | BioXCell, clone 10F.9G2 (200 µg/ml)                                  |
| Rat IgG       | <i>In Vivo</i> treatment          | BioXCell, polyclonal (200 µg/ml)                                     |

\* N/A- Not Applicable

**Secondary Ab (dilution)**

HRP anti-rabbit IgG Dako, EnVision+ System

eBioscience, anti-rat IgG-HRP (1:200)

Vector Laboratories, ImmPRESS HRP anti-goat IgG

Bio-Rad, anti-rabbit IgG-HRP (1:5000)

Bio-Rad, anti-rabbit IgG-HRP (1:5000)

Bio-Rad, anti-rabbit IgG-HRP (1:5000)

Bio-Rad, anti-rabbit IgG-HRP (1:5000)

N/A \*

N/A

N/A

Life Technologies, Alexa Fluor 488 anti-rabbit IgG (1:500)

N/A

N/A
